# Supplementary material for: Target Gene and Function Prediction of Differentially Expressed MicroRNAs in Lactating Mammary Glands of Dairy Goats
Source: Int J Genomics. 2013 Sep 30;2013:917342. doi: 10.1155/2013/917342 (PMC3806118; doi:10.1155/2013/917342)
Supplement: Supplementary file 1 — Additional file 1 contains all GO terms that are annotated to candidate target genes. The table contains all GO terms, ID, score and the number of genes be annotated to this term. The three sheets respectively are GO terms of biological process, cell component and molecular function. [file 917342.f1.xls]

## Sheet: biological_process
LevelGO	Term(Acc)	Term(Name)	#Seq	Score	Parents(Acc)	Parents(Name)
1	GO:0008150	biological_process	195	180.95
2	GO:0009987	cellular process	185	136.79	GO:0008150	biological_process
4	GO:0050794	regulation of cellular process	150	98.57	GO:0050789, GO:0009987	regulation of biological process, cellular process
3	GO:0050789	regulation of biological process	157	79.43	GO:0008150, GO:0065007	biological_process, biological regulation
2	GO:0032502	developmental process	115	74.99	GO:0008150	biological_process
3	GO:0048856	anatomical structure development	103	72.83	GO:0032502	developmental process
2	GO:0032501	multicellular organismal process	126	62.86	GO:0008150	biological_process
3	GO:0007275	multicellular organismal development	106	62.29	GO:0032501, GO:0032502	multicellular organismal process, developmental process
2	GO:0050896	response to stimulus	123	62.25	GO:0008150	biological_process
4	GO:0048731	system development	85	55.98	GO:0007275, GO:0048856	multicellular organismal development, anatomical structure development
7	GO:0006355	regulation of transcription, DNA-dependent	76	54.91	GO:2000112, GO:0010468, GO:2001141, GO:0006351	regulation of cellular macromolecule biosynthetic process, regulation of gene expression, regulation of RNA biosynthetic process, transcription, DNA-dependent
5	GO:0048513	organ development	65	53.96	GO:0048731, GO:0048856	system development, anatomical structure development
2	GO:0065007	biological regulation	160	53.53	GO:0008150	biological_process
4	GO:0030154	cell differentiation	81	52.71	GO:0048869	cellular developmental process
5	GO:0048523	negative regulation of cellular process	86	49.68	GO:0050794, GO:0048519, GO:0009987	regulation of cellular process, negative regulation of biological process, cellular process
5	GO:0048522	positive regulation of cellular process	72	45.5	GO:0050794, GO:0009987, GO:0048518	regulation of cellular process, cellular process, positive regulation of biological process
4	GO:0007165	signal transduction	84	43.52	GO:0007154, GO:0051716, GO:0050794, GO:0023052	cell communication, cellular response to stimulus, regulation of cellular process, signaling
6	GO:0010468	regulation of gene expression	91	42.64	GO:0010467, GO:0060255	gene expression, regulation of macromolecule metabolic process
6	GO:0006351	transcription, DNA-dependent	77	42.52	GO:0034645, GO:0010467, GO:0032774	cellular macromolecule biosynthetic process, gene expression, RNA biosynthetic process
4	GO:0048519	negative regulation of biological process	90	40.84	GO:0008150, GO:0050789	biological_process, regulation of biological process
4	GO:0044260	cellular macromolecule metabolic process	129	40.68	GO:0044237, GO:0043170	cellular metabolic process, macromolecule metabolic process
2	GO:0008152	metabolic process	154	39.7	GO:0008150	biological_process
3	GO:0051716	cellular response to stimulus	98	39.57	GO:0050896, GO:0009987	response to stimulus, cellular process
4	GO:0010467	gene expression	96	39.46	GO:0043170	macromolecule metabolic process
7	GO:0006366	transcription from RNA polymerase II promoter	51	39.16	GO:0006351	transcription, DNA-dependent
7	GO:2000112	regulation of cellular macromolecule biosynthetic process	87	38.41	GO:0010556, GO:0034645, GO:0031326	regulation of macromolecule biosynthetic process, cellular macromolecule biosynthetic process, regulation of cellular biosynthetic process
3	GO:0007154	cell communication	97	38.2	GO:0009987	cellular process
4	GO:0009653	anatomical structure morphogenesis	58	37.61	GO:0032502, GO:0048856	developmental process, anatomical structure development
8	GO:0006357	regulation of transcription from RNA polymerase II promoter	48	37.36	GO:0006355, GO:0006366	regulation of transcription, DNA-dependent, transcription from RNA polymerase II promoter
4	GO:0048518	positive regulation of biological process	74	37.24	GO:0008150, GO:0050789	biological_process, regulation of biological process
3	GO:0042221	response to chemical stimulus	69	36.47	GO:0050896	response to stimulus
5	GO:0034645	cellular macromolecule biosynthetic process	93	35.47	GO:0044260, GO:0044249, GO:0009059	cellular macromolecule metabolic process, cellular biosynthetic process, macromolecule biosynthetic process
3	GO:0048869	cellular developmental process	81	34.95	GO:0032502, GO:0009987	developmental process, cellular process
2	GO:0023052	signaling	96	33.55	GO:0008150	biological_process
3	GO:0044237	cellular metabolic process	146	33.03	GO:0008152, GO:0009987	metabolic process, cellular process
7	GO:2001141	regulation of RNA biosynthetic process	76	32.95	GO:0051252, GO:0031326, GO:0032774	regulation of RNA metabolic process, regulation of cellular biosynthetic process, RNA biosynthetic process
3	GO:0043170	macromolecule metabolic process	131	31.03	GO:0008152	metabolic process
5	GO:0007166	cell surface receptor signaling pathway	57	30.29	GO:0007165	signal transduction
9	GO:0045944	positive regulation of transcription from RNA polymerase II promoter	30	29.6	GO:0045893, GO:0006366, GO:0006357	positive regulation of transcription, DNA-dependent, transcription from RNA polymerase II promoter, regulation of transcription from RNA polymerase II promoter
6	GO:0031326	regulation of cellular biosynthetic process	90	27.19	GO:0031323, GO:0044249, GO:0009889	regulation of cellular metabolic process, cellular biosynthetic process, regulation of biosynthetic process
5	GO:0009966	regulation of signal transduction	41	27.07	GO:0050794, GO:0048583, GO:0023051, GO:0007165	regulation of cellular process, regulation of response to stimulus, regulation of signaling, signal transduction
4	GO:0006810	transport	56	26.74	GO:0051234	establishment of localization
5	GO:0006915	apoptotic process	37	26.66	GO:0012501	programmed cell death
3	GO:0044238	primary metabolic process	145	26.64	GO:0008152	metabolic process
5	GO:0060255	regulation of macromolecule metabolic process	103	26.5	GO:0019222, GO:0043170	regulation of metabolic process, macromolecule metabolic process
9	GO:0000122	negative regulation of transcription from RNA polymerase II promoter	26	26	GO:0045892, GO:0006366, GO:0006357	negative regulation of transcription, DNA-dependent, transcription from RNA polymerase II promoter, regulation of transcription from RNA polymerase II promoter
5	GO:0032774	RNA biosynthetic process	77	25.51	GO:0016070, GO:0044249	RNA metabolic process, cellular biosynthetic process
5	GO:0031323	regulation of cellular metabolic process	104	25.21	GO:0044237, GO:0019222, GO:0050794	cellular metabolic process, regulation of metabolic process, regulation of cellular process
3	GO:0006950	response to stress	59	25.11	GO:0050896	response to stimulus
4	GO:0044249	cellular biosynthetic process	99	25.04	GO:0044237, GO:0009058	cellular metabolic process, biosynthetic process
8	GO:0045893	positive regulation of transcription, DNA-dependent	37	24.76	GO:0006355, GO:0051254, GO:0031328, GO:0010557, GO:0006351, GO:0010628	regulation of transcription, DNA-dependent, positive regulation of RNA metabolic process, positive regulation of cellular biosynthetic process, positive regulation of macromolecule biosynthetic process, transcription, DNA-dependent, positive regulation of gene expression
8	GO:0045892	negative regulation of transcription, DNA-dependent	33	24.72	GO:0006351, GO:0051253, GO:0006355, GO:2000113, GO:0010629	transcription, DNA-dependent, negative regulation of RNA metabolic process, regulation of transcription, DNA-dependent, negative regulation of cellular macromolecule biosynthetic process, negative regulation of gene expression
6	GO:0010556	regulation of macromolecule biosynthetic process	87	24.7	GO:0060255, GO:0009889, GO:0009059	regulation of macromolecule metabolic process, regulation of biosynthetic process, macromolecule biosynthetic process
5	GO:0007399	nervous system development	51	24.07	GO:0048731	system development
5	GO:0042127	regulation of cell proliferation	37	24.08	GO:0050794, GO:0008283	regulation of cellular process, cell proliferation
7	GO:0051252	regulation of RNA metabolic process	77	23.76	GO:0016070, GO:0019219, GO:0060255	RNA metabolic process, regulation of nucleobase-containing compound metabolic process, regulation of macromolecule metabolic process
6	GO:0006464	cellular protein modification process	55	23.49	GO:0044267, GO:0036211	cellular protein metabolic process, protein modification process
4	GO:0009059	macromolecule biosynthetic process	94	22.68	GO:0043170, GO:0009058	macromolecule metabolic process, biosynthetic process
2	GO:0008283	cell proliferation	42	22.05	GO:0008150	biological_process
5	GO:0009887	organ morphogenesis	28	21.94	GO:0009653, GO:0048513	anatomical structure morphogenesis, organ development
5	GO:0044267	cellular protein metabolic process	69	21.65	GO:0019538, GO:0044260	protein metabolic process, cellular macromolecule metabolic process
4	GO:0023051	regulation of signaling	49	21.41	GO:0050789, GO:0023052	regulation of biological process, signaling
4	GO:0048583	regulation of response to stimulus	48	20.93	GO:0050789, GO:0050896	regulation of biological process, response to stimulus
6	GO:0016070	RNA metabolic process	88	20.9	GO:0090304, GO:0044260	nucleic acid metabolic process, cellular macromolecule metabolic process
3	GO:0016043	cellular component organization	87	20.83	GO:0071840	cellular component organization or biogenesis
4	GO:0019222	regulation of metabolic process	110	20.52	GO:0008152, GO:0050789	metabolic process, regulation of biological process
4	GO:0010033	response to organic substance	50	20.44	GO:0042221	response to chemical stimulus
7	GO:0031328	positive regulation of cellular biosynthetic process	43	20.36	GO:0031326, GO:0044249, GO:0031325, GO:0009891	regulation of cellular biosynthetic process, cellular biosynthetic process, positive regulation of cellular metabolic process, positive regulation of biosynthetic process
7	GO:0010557	positive regulation of macromolecule biosynthetic process	40	19.78	GO:0009059, GO:0010556, GO:0010604, GO:0009891	macromolecule biosynthetic process, regulation of macromolecule biosynthetic process, positive regulation of macromolecule metabolic process, positive regulation of biosynthetic process
6	GO:0008284	positive regulation of cell proliferation	22	19.6	GO:0048522, GO:0042127, GO:0008283	positive regulation of cellular process, regulation of cell proliferation, cell proliferation
7	GO:0006468	protein phosphorylation	33	19.3	GO:0016310, GO:0006464	phosphorylation, cellular protein modification process
8	GO:0043066	negative regulation of apoptotic process	24	18.68	GO:0043069, GO:0006915, GO:0042981	negative regulation of programmed cell death, apoptotic process, regulation of apoptotic process
3	GO:0009058	biosynthetic process	102	18.52	GO:0008152	metabolic process
5	GO:0090304	nucleic acid metabolic process	95	18.43	GO:0006139	nucleobase-containing compound metabolic process
7	GO:0010629	negative regulation of gene expression	40	18.32	GO:0010467, GO:0010468, GO:0010605	gene expression, regulation of gene expression, negative regulation of macromolecule metabolic process
5	GO:0080090	regulation of primary metabolic process	102	18.32	GO:0019222, GO:0044238	regulation of metabolic process, primary metabolic process
5	GO:0048468	cell development	53	18.13	GO:0048869, GO:0048856, GO:0030154	cellular developmental process, anatomical structure development, cell differentiation
4	GO:0019538	protein metabolic process	74	17.95	GO:0044238, GO:0043170	primary metabolic process, macromolecule metabolic process
3	GO:0051234	establishment of localization	58	17.94	GO:0008150, GO:0051179	biological_process, localization
3	GO:0065008	regulation of biological quality	57	17.84	GO:0065007	biological regulation
8	GO:2000113	negative regulation of cellular macromolecule biosynthetic process	40	17.62	GO:2000112, GO:0031327, GO:0034645, GO:0010558	regulation of cellular macromolecule biosynthetic process, negative regulation of cellular biosynthetic process, cellular macromolecule biosynthetic process, negative regulation of macromolecule biosynthetic process
4	GO:0012501	programmed cell death	38	17.59	GO:0008219	cell death
7	GO:0042981	regulation of apoptotic process	32	17.42	GO:0006915, GO:0043067	apoptotic process, regulation of programmed cell death
4	GO:0050793	regulation of developmental process	48	17.39	GO:0032502, GO:0050789	developmental process, regulation of biological process
3	GO:0008219	cell death	45	17.36	GO:0016265, GO:0009987	death, cellular process
8	GO:0007409	axonogenesis	22	17.2	GO:0048667, GO:0048812	cell morphogenesis involved in neuron differentiation, neuron projection morphogenesis
4	GO:0071842	cellular component organization at cellular level	68	17	GO:0071841, GO:0016043	cellular component organization or biogenesis at cellular level, cellular component organization
5	GO:0009889	regulation of biosynthetic process	90	16.88	GO:0019222, GO:0009058	regulation of metabolic process, biosynthetic process
7	GO:0010628	positive regulation of gene expression	39	16.86	GO:0010468, GO:0010604, GO:0010467	regulation of gene expression, positive regulation of macromolecule metabolic process, gene expression
6	GO:0009968	negative regulation of signal transduction	21	16.74	GO:0007165, GO:0009966, GO:0048585, GO:0023057, GO:0010648	signal transduction, regulation of signal transduction, negative regulation of response to stimulus, negative regulation of signaling, negative regulation of cell communication
6	GO:0010604	positive regulation of macromolecule metabolic process	54	16.37	GO:0043170, GO:0009893, GO:0060255	macromolecule metabolic process, positive regulation of metabolic process, regulation of macromolecule metabolic process
6	GO:0019219	regulation of nucleobase-containing compound metabolic process	85	15.98	GO:0006139, GO:0051171, GO:0080090, GO:0031323	nucleobase-containing compound metabolic process, regulation of nitrogen compound metabolic process, regulation of primary metabolic process, regulation of cellular metabolic process
5	GO:0045595	regulation of cell differentiation	42	15.91	GO:0050794, GO:0030154, GO:0050793	regulation of cellular process, cell differentiation, regulation of developmental process
4	GO:0009790	embryo development	32	15.84	GO:0007275, GO:0048856	multicellular organismal development, anatomical structure development
5	GO:0010646	regulation of cell communication	43	15.53	GO:0007154, GO:0050794	cell communication, regulation of cellular process
2	GO:0051179	localization	72	15.44	GO:0008150	biological_process
9	GO:0007411	axon guidance	17	15.16	GO:0007409, GO:0006935	axonogenesis, chemotaxis
4	GO:0009888	tissue development	37	14.85	GO:0048856	anatomical structure development
7	GO:0051254	positive regulation of RNA metabolic process	37	14.86	GO:0051252, GO:0045935, GO:0010604, GO:0016070	regulation of RNA metabolic process, positive regulation of nucleobase-containing compound metabolic process, positive regulation of macromolecule metabolic process, RNA metabolic process
7	GO:0051253	negative regulation of RNA metabolic process	33	14.83	GO:0051252, GO:0045934, GO:0016070, GO:0010605	regulation of RNA metabolic process, negative regulation of nucleobase-containing compound metabolic process, RNA metabolic process, negative regulation of macromolecule metabolic process
6	GO:0016310	phosphorylation	35	14.79	GO:0006796	phosphate-containing compound metabolic process
4	GO:0051239	regulation of multicellular organismal process	46	14.78	GO:0050789, GO:0032501	regulation of biological process, multicellular organismal process
3	GO:0007267	cell-cell signaling	32	14.66	GO:0007154, GO:0023052	cell communication, signaling
5	GO:0048585	negative regulation of response to stimulus	24	14.24	GO:0048583, GO:0048519, GO:0050896	regulation of response to stimulus, negative regulation of biological process, response to stimulus
4	GO:0033554	cellular response to stress	31	14.16	GO:0006950, GO:0051716	response to stress, cellular response to stimulus
5	GO:0036211	protein modification process	55	14.09	GO:0043412, GO:0019538	macromolecule modification, protein metabolic process
5	GO:0071310	cellular response to organic substance	41	14.07	GO:0010033, GO:0070887	response to organic substance, cellular response to chemical stimulus
3	GO:0007049	cell cycle	28	14.04	GO:0009987	cellular process
5	GO:0051093	negative regulation of developmental process	31	13.77	GO:0032502, GO:0048519, GO:0050793	developmental process, negative regulation of biological process, regulation of developmental process
6	GO:0010605	negative regulation of macromolecule metabolic process	47	13.72	GO:0043170, GO:0060255, GO:0009892	macromolecule metabolic process, regulation of macromolecule metabolic process, negative regulation of metabolic process
4	GO:0070887	cellular response to chemical stimulus	46	13.73	GO:0042221, GO:0051716	response to chemical stimulus, cellular response to stimulus
7	GO:0007169	transmembrane receptor protein tyrosine kinase signaling pathway	21	13.73	GO:0007167	enzyme linked receptor protein signaling pathway
5	GO:0007268	synaptic transmission	21	13.65	GO:0019226, GO:0007267	transmission of nerve impulse, cell-cell signaling
7	GO:0030182	neuron differentiation	32	13.59	GO:0048699, GO:0030154	generation of neurons, cell differentiation
6	GO:0008285	negative regulation of cell proliferation	17	13.24	GO:0048523, GO:0042127, GO:0008283	negative regulation of cellular process, regulation of cell proliferation, cell proliferation
6	GO:0007507	heart development	17	13.19	GO:0048513, GO:0072358	organ development, cardiovascular system development
9	GO:0016567	protein ubiquitination	16	13.17	GO:0032446	protein modification by small protein conjugation
6	GO:0031325	positive regulation of cellular metabolic process	54	13.06	GO:0044237, GO:0048522, GO:0009893, GO:0031323	cellular metabolic process, positive regulation of cellular process, positive regulation of metabolic process, regulation of cellular metabolic process
7	GO:0031327	negative regulation of cellular biosynthetic process	42	12.97	GO:0044249, GO:0031326, GO:0031324, GO:0009890	cellular biosynthetic process, regulation of cellular biosynthetic process, negative regulation of cellular metabolic process, negative regulation of biosynthetic process
6	GO:0009891	positive regulation of biosynthetic process	43	12.94	GO:0009058, GO:0009893, GO:0009889	biosynthetic process, positive regulation of metabolic process, regulation of biosynthetic process
5	GO:0035556	intracellular signal transduction	34	12.93	GO:0007165	signal transduction
6	GO:0007167	enzyme linked receptor protein signaling pathway	31	12.82	GO:0007166	cell surface receptor signaling pathway
6	GO:0045596	negative regulation of cell differentiation	28	12.76	GO:0030154, GO:0048523, GO:0045595, GO:0051093	cell differentiation, negative regulation of cellular process, regulation of cell differentiation, negative regulation of developmental process
2	GO:0071840	cellular component organization or biogenesis	87	12.66	GO:0008150	biological_process
4	GO:0051128	regulation of cellular component organization	33	12.65	GO:0016043, GO:0050789	cellular component organization, regulation of biological process
5	GO:0006996	organelle organization	38	12.59	GO:0071842	cellular component organization at cellular level
4	GO:0006139	nucleobase-containing compound metabolic process	111	12.53	GO:0044238, GO:0034641	primary metabolic process, cellular nitrogen compound metabolic process
7	GO:0048667	cell morphogenesis involved in neuron differentiation	24	12.36	GO:0000904, GO:0048666	cell morphogenesis involved in differentiation, neuron development
7	GO:0048812	neuron projection morphogenesis	24	12.36	GO:0031175, GO:0048858	neuron projection development, cell projection morphogenesis
4	GO:0022402	cell cycle process	21	12.22	GO:0007049, GO:0009987	cell cycle, cellular process
6	GO:0072358	cardiovascular system development	30	12.19	GO:0072359, GO:0048731	circulatory system development, system development
5	GO:2000026	regulation of multicellular organismal development	37	12.1	GO:0007275, GO:0051239, GO:0050793	multicellular organismal development, regulation of multicellular organismal process, regulation of developmental process
5	GO:0051094	positive regulation of developmental process	24	12.07	GO:0032502, GO:0050793, GO:0048518	developmental process, regulation of developmental process, positive regulation of biological process
4	GO:0042493	response to drug	12	12	GO:0042221	response to chemical stimulus
7	GO:0048699	generation of neurons	34	11.91	GO:0022008	neurogenesis
3	GO:0003008	system process	43	11.67	GO:0032501	multicellular organismal process
7	GO:0010558	negative regulation of macromolecule biosynthetic process	42	11.65	GO:0009059, GO:0010556, GO:0010605, GO:0009890	macromolecule biosynthetic process, regulation of macromolecule biosynthetic process, negative regulation of macromolecule metabolic process, negative regulation of biosynthetic process
4	GO:0048646	anatomical structure formation involved in morphogenesis	24	11.42	GO:0009653, GO:0032502	anatomical structure morphogenesis, developmental process
7	GO:0043069	negative regulation of programmed cell death	24	11.21	GO:0012501, GO:0043067, GO:0060548	programmed cell death, regulation of programmed cell death, negative regulation of cell death
6	GO:0001568	blood vessel development	24	11.14	GO:0001944, GO:0048856	vasculature development, anatomical structure development
6	GO:0031324	negative regulation of cellular metabolic process	46	11.15	GO:0048523, GO:0044237, GO:0031323, GO:0009892	negative regulation of cellular process, cellular metabolic process, regulation of cellular metabolic process, negative regulation of metabolic process
4	GO:0051649	establishment of localization in cell	38	11.06	GO:0051234, GO:0051641	establishment of localization, cellular localization
4	GO:0006935	chemotaxis	19	11.06	GO:0042221, GO:0042330	response to chemical stimulus, taxis
6	GO:0009967	positive regulation of signal transduction	18	11.06	GO:0023056, GO:0009966, GO:0048584, GO:0010647, GO:0007165	positive regulation of signaling, regulation of signal transduction, positive regulation of response to stimulus, positive regulation of cell communication, signal transduction
5	GO:0001501	skeletal system development	14	10.99	GO:0048731	system development
6	GO:0031175	neuron projection development	29	10.85	GO:0048666, GO:0030030	neuron development, cell projection organization
5	GO:0016477	cell migration	18	10.79	GO:0048870	cell motility
3	GO:0065009	regulation of molecular function	40	10.75	GO:0065007	biological regulation
7	GO:0045935	positive regulation of nucleobase-containing compound metabolic process	40	10.71	GO:0006139, GO:0051173, GO:0019219, GO:0031325	nucleobase-containing compound metabolic process, positive regulation of nitrogen compound metabolic process, regulation of nucleobase-containing compound metabolic process, positive regulation of cellular metabolic process
9	GO:0001934	positive regulation of protein phosphorylation	19	10.62	GO:0001932, GO:0042327, GO:0031401, GO:0006468	regulation of protein phosphorylation, positive regulation of phosphorylation, positive regulation of protein modification process, protein phosphorylation
3	GO:0007155	cell adhesion	18	10.58	GO:0022610, GO:0009987	biological adhesion, cellular process
6	GO:0007417	central nervous system development	20	10.58	GO:0007399, GO:0048731	nervous system development, system development
5	GO:0048514	blood vessel morphogenesis	19	10.51	GO:0001568, GO:0009653	blood vessel development, anatomical structure morphogenesis
6	GO:0043067	regulation of programmed cell death	32	10.45	GO:0010941, GO:0012501	regulation of cell death, programmed cell death
5	GO:0051171	regulation of nitrogen compound metabolic process	86	10.44	GO:0019222, GO:0006807	regulation of metabolic process, nitrogen compound metabolic process
2	GO:0016265	death	45	10.41	GO:0008150	biological_process
4	GO:0050877	neurological system process	33	10.42	GO:0003008	system process
3	GO:0071841	cellular component organization or biogenesis at cellular level	68	10.38	GO:0071840, GO:0009987	cellular component organization or biogenesis, cellular process
6	GO:0048666	neuron development	30	10.35	GO:0030182, GO:0048468	neuron differentiation, cell development
5	GO:0001525	angiogenesis	14	10.32	GO:0048646, GO:0048514	anatomical structure formation involved in morphogenesis, blood vessel morphogenesis
4	GO:0043412	macromolecule modification	57	10.16	GO:0043170	macromolecule metabolic process
3	GO:0022414	reproductive process	27	10.14	GO:0008150, GO:0000003	biological_process, reproduction
5	GO:0006796	phosphate-containing compound metabolic process	39	10.14	GO:0006793	phosphorus metabolic process
6	GO:0015031	protein transport	21	10.12	GO:0045184, GO:0006810	establishment of protein localization, transport
4	GO:0008104	protein localization	28	10.13	GO:0033036	macromolecule localization
6	GO:0043009	chordate embryonic development	20	10.05	GO:0009792	embryo development ending in birth or egg hatching
5	GO:0023057	negative regulation of signaling	21	10.04	GO:0023052, GO:0048519, GO:0023051	signaling, negative regulation of biological process, regulation of signaling
6	GO:0010648	negative regulation of cell communication	21	10.04	GO:0048523, GO:0010646, GO:0007154	negative regulation of cellular process, regulation of cell communication, cell communication
8	GO:0045860	positive regulation of protein kinase activity	14	9.95	GO:0033674, GO:0045859, GO:0001934	positive regulation of kinase activity, regulation of protein kinase activity, positive regulation of protein phosphorylation
5	GO:0009893	positive regulation of metabolic process	56	9.83	GO:0008152, GO:0019222, GO:0048518	metabolic process, regulation of metabolic process, positive regulation of biological process
8	GO:0001932	regulation of protein phosphorylation	24	9.81	GO:0031399, GO:0042325, GO:0006468	regulation of protein modification process, regulation of phosphorylation, protein phosphorylation
5	GO:0016192	vesicle-mediated transport	18	9.74	GO:0006810	transport
5	GO:0048598	embryonic morphogenesis	18	9.75	GO:0009790, GO:0009653	embryo development, anatomical structure morphogenesis
2	GO:0040007	growth	23	9.75	GO:0008150	biological_process
6	GO:0032268	regulation of cellular protein metabolic process	37	9.61	GO:0051246, GO:0031323, GO:0044267	regulation of protein metabolic process, regulation of cellular metabolic process, cellular protein metabolic process
6	GO:0006259	DNA metabolic process	16	9.58	GO:0090304, GO:0044260	nucleic acid metabolic process, cellular macromolecule metabolic process
6	GO:0048562	embryonic organ morphogenesis	13	9.58	GO:0048598, GO:0009887, GO:0048568	embryonic morphogenesis, organ morphogenesis, embryonic organ development
7	GO:0045934	negative regulation of nucleobase-containing compound metabolic process	36	9.52	GO:0051172, GO:0006139, GO:0031324, GO:0019219	negative regulation of nitrogen compound metabolic process, nucleobase-containing compound metabolic process, negative regulation of cellular metabolic process, regulation of nucleobase-containing compound metabolic process
7	GO:0001701	in utero embryonic development	10	9.42	GO:0043009	chordate embryonic development
6	GO:0007596	blood coagulation	12	9.36	GO:0007599, GO:0050817, GO:0042060	hemostasis, coagulation, wound healing
5	GO:0048584	positive regulation of response to stimulus	22	9.32	GO:0050896, GO:0048583, GO:0048518	response to stimulus, regulation of response to stimulus, positive regulation of biological process
4	GO:0035295	tube development	19	9.3	GO:0007275, GO:0048856	multicellular organismal development, anatomical structure development
4	GO:0019226	transmission of nerve impulse	24	9.29	GO:0035637, GO:0007154, GO:0050877	multicellular organismal signaling, cell communication, neurological system process
3	GO:0007610	behavior	20	9.21	GO:0050896	response to stimulus
5	GO:0051726	regulation of cell cycle	19	9.2	GO:0050794, GO:0007049	regulation of cellular process, cell cycle
2	GO:0000003	reproduction	30	9.08	GO:0008150	biological_process
3	GO:0009605	response to external stimulus	39	8.96	GO:0050896	response to stimulus
8	GO:0045859	regulation of protein kinase activity	19	8.9	GO:0001932, GO:0043549	regulation of protein phosphorylation, regulation of kinase activity
3	GO:0051641	cellular localization	41	8.75	GO:0051179, GO:0009987	localization, cellular process
6	GO:0060548	negative regulation of cell death	26	8.72	GO:0048523, GO:0008219, GO:0010941	negative regulation of cellular process, cell death, regulation of cell death
6	GO:0022008	neurogenesis	34	8.71	GO:0007399, GO:0030154	nervous system development, cell differentiation
6	GO:0045597	positive regulation of cell differentiation	18	8.72	GO:0051094, GO:0045595, GO:0048522, GO:0030154	positive regulation of developmental process, regulation of cell differentiation, positive regulation of cellular process, cell differentiation
8	GO:0046777	protein autophosphorylation	10	8.72	GO:0006468	protein phosphorylation
8	GO:0031401	positive regulation of protein modification process	22	8.65	GO:0032270, GO:0006464, GO:0031399	positive regulation of cellular protein metabolic process, cellular protein modification process, regulation of protein modification process
7	GO:0031399	regulation of protein modification process	26	8.65	GO:0032268, GO:0006464	regulation of cellular protein metabolic process, cellular protein modification process
6	GO:0010647	positive regulation of cell communication	21	8.63	GO:0010646, GO:0007154, GO:0048522	regulation of cell communication, cell communication, positive regulation of cellular process
3	GO:0009628	response to abiotic stimulus	17	8.57	GO:0050896	response to stimulus
5	GO:0051049	regulation of transport	30	8.53	GO:0006810, GO:0032879	transport, regulation of localization
8	GO:0032446	protein modification by small protein conjugation	17	8.5	GO:0070647	protein modification by small protein conjugation or removal
2	GO:0051704	multi-organism process	21	8.45	GO:0008150	biological_process
7	GO:0007283	spermatogenesis	11	8.44	GO:0048232	male gamete generation
3	GO:0033036	macromolecule localization	35	8.43	GO:0051179	localization
4	GO:0032879	regulation of localization	37	8.33	GO:0050789, GO:0051179	regulation of biological process, localization
5	GO:0009892	negative regulation of metabolic process	49	8.31	GO:0008152, GO:0019222, GO:0048519	metabolic process, regulation of metabolic process, negative regulation of biological process
2	GO:0040011	locomotion	30	8.26	GO:0008150	biological_process
4	GO:0006629	lipid metabolic process	26	8.26	GO:0044238	primary metabolic process
5	GO:0030030	cell projection organization	31	8.26	GO:0071842	cellular component organization at cellular level
4	GO:0044093	positive regulation of molecular function	26	8.25	GO:0065009	regulation of molecular function
6	GO:0000904	cell morphogenesis involved in differentiation	27	8.21	GO:0048468, GO:0000902	cell development, cell morphogenesis
5	GO:0046907	intracellular transport	22	8.2	GO:0051649, GO:0006810	establishment of localization in cell, transport
3	GO:0009719	response to endogenous stimulus	32	8.16	GO:0050896	response to stimulus
5	GO:0055085	transmembrane transport	17	8.14	GO:0006810, GO:0009987	transport, cellular process
8	GO:0043065	positive regulation of apoptotic process	12	8.08	GO:0006915, GO:0043068, GO:0042981	apoptotic process, positive regulation of programmed cell death, regulation of apoptotic process
6	GO:0001944	vasculature development	25	8.06	GO:0048731, GO:0072358	system development, cardiovascular system development
5	GO:0010941	regulation of cell death	35	8.07	GO:0008219, GO:0050794	cell death, regulation of cellular process
4	GO:0034641	cellular nitrogen compound metabolic process	113	8.05	GO:0044237, GO:0006807	cellular metabolic process, nitrogen compound metabolic process
8	GO:0006184	GTP catabolic process	12	8.04	GO:0046039, GO:1901069, GO:0009207	GTP metabolic process, guanosine-containing compound catabolic process, purine ribonucleoside triphosphate catabolic process
7	GO:0051090	regulation of sequence-specific DNA binding transcription factor activity	15	8.04	GO:0006355, GO:0065009	regulation of transcription, DNA-dependent, regulation of molecular function
5	GO:0023056	positive regulation of signaling	20	8.03	GO:0023051, GO:0023052, GO:0048518	regulation of signaling, signaling, positive regulation of biological process
6	GO:0051246	regulation of protein metabolic process	38	7.99	GO:0080090, GO:0019538, GO:0060255	regulation of primary metabolic process, protein metabolic process, regulation of macromolecule metabolic process
6	GO:0006461	protein complex assembly	17	7.95	GO:0065003, GO:0070271, GO:0071822	macromolecular complex assembly, protein complex biogenesis, protein complex subunit organization
5	GO:0048568	embryonic organ development	15	7.95	GO:0048513, GO:0009790	organ development, embryo development
6	GO:0007420	brain development	15	7.96	GO:0007417, GO:0048513	central nervous system development, organ development
9	GO:0045664	regulation of neuron differentiation	18	7.82	GO:0030182, GO:0050767	neuron differentiation, regulation of neurogenesis
4	GO:0071495	cellular response to endogenous stimulus	27	7.83	GO:0009719	response to endogenous stimulus
8	GO:0042325	regulation of phosphorylation	25	7.82	GO:0016310, GO:0019220	phosphorylation, regulation of phosphate metabolic process
6	GO:0009890	negative regulation of biosynthetic process	42	7.78	GO:0009058, GO:0009892, GO:0009889	biosynthetic process, negative regulation of metabolic process, regulation of biosynthetic process
8	GO:0016568	chromatin modification	16	7.76	GO:0006325	chromatin organization
6	GO:0006897	endocytosis	11	7.71	GO:0016192	vesicle-mediated transport
4	GO:0009611	response to wounding	22	7.63	GO:0006950	response to stress
7	GO:0007178	transmembrane receptor protein serine/threonine kinase signaling pathway	13	7.64	GO:0007167	enzyme linked receptor protein signaling pathway
4	GO:0040008	regulation of growth	15	7.6	GO:0050789, GO:0040007	regulation of biological process, growth
4	GO:0003006	developmental process involved in reproduction	16	7.59	GO:0022414, GO:0032502	reproductive process, developmental process
5	GO:0046903	secretion	20	7.53	GO:0006810	transport
5	GO:0042060	wound healing	15	7.43	GO:0009611	response to wounding
5	GO:0003002	regionalization	11	7.44	GO:0007389	pattern specification process
4	GO:0000278	mitotic cell cycle	17	7.43	GO:0007049	cell cycle
6	GO:0048858	cell projection morphogenesis	24	7.42	GO:0030030, GO:0000902, GO:0032990	cell projection organization, cell morphogenesis, cell part morphogenesis
8	GO:0033674	positive regulation of kinase activity	15	7.41	GO:0043549, GO:0051347	regulation of kinase activity, positive regulation of transferase activity
8	GO:0051091	positive regulation of sequence-specific DNA binding transcription factor activity	8	7.4	GO:0051090, GO:0044093	regulation of sequence-specific DNA binding transcription factor activity, positive regulation of molecular function
8	GO:0007179	transforming growth factor beta receptor signaling pathway	10	7.36	GO:0007178	transmembrane receptor protein serine/threonine kinase signaling pathway
5	GO:0072359	circulatory system development	30	7.31	GO:0048731	system development
5	GO:0051130	positive regulation of cellular component organization	18	7.31	GO:0051128, GO:0016043, GO:0048518	regulation of cellular component organization, cellular component organization, positive regulation of biological process
4	GO:0044092	negative regulation of molecular function	17	7.31	GO:0065009	regulation of molecular function
2	GO:0002376	immune system process	29	7.29	GO:0008150	biological_process
7	GO:0032270	positive regulation of cellular protein metabolic process	24	7.23	GO:0032268, GO:0051247, GO:0044267, GO:0031325	regulation of cellular protein metabolic process, positive regulation of protein metabolic process, cellular protein metabolic process, positive regulation of cellular metabolic process
5	GO:0034097	response to cytokine stimulus	15	7.22	GO:0010033	response to organic substance
7	GO:0030334	regulation of cell migration	10	7.18	GO:2000145, GO:0016477	regulation of cell motility, cell migration
6	GO:0030324	lung development	8	7.15	GO:0060541, GO:0030323, GO:0048513	respiratory system development, respiratory tube development, organ development
7	GO:0048839	inner ear development	9	7.14	GO:0048856, GO:0043583	anatomical structure development, ear development
5	GO:0042692	muscle cell differentiation	14	7.15	GO:0030154, GO:0061061	cell differentiation, muscle structure development
5	GO:0006974	response to DNA damage stimulus	10	7.14	GO:0033554	cellular response to stress
6	GO:0016071	mRNA metabolic process	16	7.1	GO:0016070	RNA metabolic process
5	GO:0045184	establishment of protein localization	22	7.07	GO:0051234, GO:0008104	establishment of localization, protein localization
5	GO:0060429	epithelium development	15	7.06	GO:0009888	tissue development
3	GO:0044419	interspecies interaction between organisms	8	7.05	GO:0051704	multi-organism process
6	GO:0051173	positive regulation of nitrogen compound metabolic process	40	7.02	GO:0051171, GO:0009893, GO:0006807	regulation of nitrogen compound metabolic process, positive regulation of metabolic process, nitrogen compound metabolic process
10	GO:0010975	regulation of neuron projection development	13	7.03	GO:0031175, GO:0031344, GO:0045664	neuron projection development, regulation of cell projection organization, regulation of neuron differentiation
3	GO:0044281	small molecule metabolic process	41	6.97	GO:0008152	metabolic process
7	GO:0050767	regulation of neurogenesis	20	6.97	GO:0022008, GO:0048699, GO:0060284, GO:0051960	neurogenesis, generation of neurons, regulation of cell development, regulation of nervous system development
6	GO:0009952	anterior/posterior pattern specification	8	6.94	GO:0003002	regionalization
8	GO:0006397	mRNA processing	12	6.9	GO:0016071, GO:0006396	mRNA metabolic process, RNA processing
4	GO:0050790	regulation of catalytic activity	28	6.88	GO:0019222, GO:0065009	regulation of metabolic process, regulation of molecular function
7	GO:0010627	regulation of intracellular protein kinase cascade	19	6.86	GO:0009966, GO:0007243	regulation of signal transduction, intracellular protein kinase cascade
3	GO:0016049	cell growth	11	6.84	GO:0040007, GO:0009987	growth, cellular process
4	GO:0009725	response to hormone stimulus	21	6.82	GO:0010033, GO:0009719	response to organic substance, response to endogenous stimulus
6	GO:0003007	heart morphogenesis	9	6.8	GO:0007507, GO:0009887	heart development, organ morphogenesis
9	GO:0006916	anti-apoptosis	8	6.8	GO:0043066	negative regulation of apoptotic process
6	GO:0030308	negative regulation of cell growth	7	6.8	GO:0048523, GO:0016049, GO:0045926, GO:0001558	negative regulation of cellular process, cell growth, negative regulation of growth, regulation of cell growth
7	GO:0010608	posttranscriptional regulation of gene expression	19	6.75	GO:0010468	regulation of gene expression
5	GO:0008406	gonad development	11	6.74	GO:0048513, GO:0048608, GO:0045137	organ development, reproductive structure development, development of primary sexual characteristics
10	GO:0002224	toll-like receptor signaling pathway	2	6.72	GO:0002221	pattern recognition receptor signaling pathway
5	GO:0051129	negative regulation of cellular component organization	15	6.69	GO:0051128, GO:0016043, GO:0048519	regulation of cellular component organization, cellular component organization, negative regulation of biological process
6	GO:0007010	cytoskeleton organization	13	6.66	GO:0006996	organelle organization
6	GO:0007243	intracellular protein kinase cascade	22	6.65	GO:0035556	intracellular signal transduction
3	GO:0042330	taxis	19	6.64	GO:0040011, GO:0009605	locomotion, response to external stimulus
5	GO:0009792	embryo development ending in birth or egg hatching	20	6.63	GO:0009790	embryo development
5	GO:0032940	secretion by cell	18	6.63	GO:0046903, GO:0051649, GO:0009987	secretion, establishment of localization in cell, cellular process
6	GO:0019221	cytokine-mediated signaling pathway	8	6.62	GO:0007166, GO:0071345	cell surface receptor signaling pathway, cellular response to cytokine stimulus
7	GO:0009207	purine ribonucleoside triphosphate catabolic process	15	6.63	GO:0009205, GO:0009154, GO:0009203, GO:0009146	purine ribonucleoside triphosphate metabolic process, purine ribonucleotide catabolic process, ribonucleoside triphosphate catabolic process, purine nucleoside triphosphate catabolic process
7	GO:0043549	regulation of kinase activity	21	6.56	GO:0051338, GO:0042325	regulation of transferase activity, regulation of phosphorylation
6	GO:0071363	cellular response to growth factor stimulus	13	6.57	GO:0071310, GO:0070848	cellular response to organic substance, response to growth factor stimulus
3	GO:0001503	ossification	13	6.55	GO:0032501	multicellular organismal process
4	GO:0016337	cell-cell adhesion	10	6.56	GO:0007155	cell adhesion
4	GO:0048870	cell motility	18	6.47	GO:0040011, GO:0006928, GO:0051674	locomotion, cellular component movement, localization of cell
6	GO:0051276	chromosome organization	20	6.48	GO:0006996	organelle organization
5	GO:0071844	cellular component assembly at cellular level	18	6.43	GO:0022607, GO:0071842	cellular component assembly, cellular component organization at cellular level
7	GO:0030097	hemopoiesis	11	6.42	GO:0048534	hemopoietic or lymphoid organ development
6	GO:0007423	sensory organ development	16	6.41	GO:0048513	organ development
6	GO:0006412	translation	11	6.36	GO:0034645, GO:0044267, GO:0010467	cellular macromolecule biosynthetic process, cellular protein metabolic process, gene expression
9	GO:0042327	positive regulation of phosphorylation	19	6.37	GO:0016310, GO:0042325, GO:0045937	phosphorylation, regulation of phosphorylation, positive regulation of phosphate metabolic process
6	GO:0006886	intracellular protein transport	14	6.37	GO:0034613, GO:0015031, GO:0046907	cellular protein localization, protein transport, intracellular transport
5	GO:0060341	regulation of cellular localization	17	6.35	GO:0032879, GO:0050794, GO:0051641	regulation of localization, regulation of cellular process, cellular localization
2	GO:0022610	biological adhesion	18	6.35	GO:0008150	biological_process
4	GO:0061061	muscle structure development	19	6.35	GO:0048856	anatomical structure development
6	GO:0030323	respiratory tube development	10	6.29	GO:0035295, GO:0048513	tube development, organ development
4	GO:0007389	pattern specification process	13	6.17	GO:0007275, GO:0032502	multicellular organismal development, developmental process
4	GO:0022607	cellular component assembly	29	6.12	GO:0044085, GO:0016043	cellular component biogenesis, cellular component organization
6	GO:0007186	G-protein coupled receptor signaling pathway	8	6.11	GO:0007166	cell surface receptor signaling pathway
4	GO:0006793	phosphorus metabolic process	39	6.09	GO:0044237	cellular metabolic process
7	GO:0048704	embryonic skeletal system morphogenesis	8	6.08	GO:0048706, GO:0048562, GO:0048705	embryonic skeletal system development, embryonic organ morphogenesis, skeletal system morphogenesis
5	GO:0048729	tissue morphogenesis	18	6.07	GO:0009888, GO:0009653	tissue development, anatomical structure morphogenesis
6	GO:0006396	RNA processing	13	6.06	GO:0016070, GO:0010467	RNA metabolic process, gene expression
6	GO:0006260	DNA replication	8	6.02	GO:0034645, GO:0006259	cellular macromolecule biosynthetic process, DNA metabolic process
4	GO:0001666	response to hypoxia	8	6	GO:0006950, GO:0036293	response to stress, response to decreased oxygen levels
7	GO:0000082	G1/S transition of mitotic cell cycle	6	6	GO:0022402, GO:0051329	cell cycle process, interphase of mitotic cell cycle
8	GO:0043433	negative regulation of sequence-specific DNA binding transcription factor activity	8	6	GO:0051090, GO:0044092	regulation of sequence-specific DNA binding transcription factor activity, negative regulation of molecular function
6	GO:0051172	negative regulation of nitrogen compound metabolic process	37	5.93	GO:0051171, GO:0006807, GO:0009892	regulation of nitrogen compound metabolic process, nitrogen compound metabolic process, negative regulation of metabolic process
9	GO:0071900	regulation of protein serine/threonine kinase activity	11	5.91	GO:0045859	regulation of protein kinase activity
3	GO:0006928	cellular component movement	22	5.92	GO:0009987	cellular process
3	GO:0050878	regulation of body fluid levels	15	5.91	GO:0032501, GO:0065008	multicellular organismal process, regulation of biological quality
7	GO:0070647	protein modification by small protein conjugation or removal	19	5.89	GO:0006464	cellular protein modification process
7	GO:0051247	positive regulation of protein metabolic process	26	5.83	GO:0010604, GO:0051246, GO:0019538	positive regulation of macromolecule metabolic process, regulation of protein metabolic process, protein metabolic process
8	GO:0090092	regulation of transmembrane receptor protein serine/threonine kinase signaling pathway	8	5.83	GO:0007178, GO:0009966	transmembrane receptor protein serine/threonine kinase signaling pathway, regulation of signal transduction
5	GO:0034613	cellular protein localization	17	5.83	GO:0070727, GO:0008104	cellular macromolecule localization, protein localization
8	GO:0030336	negative regulation of cell migration	7	5.82	GO:0030334, GO:0016477, GO:2000146	regulation of cell migration, cell migration, negative regulation of cell motility
5	GO:0001558	regulation of cell growth	9	5.82	GO:0051128, GO:0050794, GO:0016049, GO:0040008	regulation of cellular component organization, regulation of cellular process, cell growth, regulation of growth
8	GO:0008286	insulin receptor signaling pathway	7	5.8	GO:0007169, GO:0032869	transmembrane receptor protein tyrosine kinase signaling pathway, cellular response to insulin stimulus
6	GO:0007264	small GTPase mediated signal transduction	9	5.79	GO:0035556	intracellular signal transduction
6	GO:0071345	cellular response to cytokine stimulus	11	5.77	GO:0071310, GO:0034097	cellular response to organic substance, response to cytokine stimulus
7	GO:0043583	ear development	10	5.72	GO:0007423	sensory organ development
4	GO:0006952	defense response	11	5.7	GO:0006950	response to stress
6	GO:0048705	skeletal system morphogenesis	9	5.67	GO:0001501, GO:0009887	skeletal system development, organ morphogenesis
5	GO:0048534	hemopoietic or lymphoid organ development	13	5.65	GO:0002520, GO:0048513	immune system development, organ development
5	GO:0035239	tube morphogenesis	12	5.62	GO:0035295, GO:0009653	tube development, anatomical structure morphogenesis
4	GO:0007599	hemostasis	12	5.62	GO:0050878	regulation of body fluid levels
6	GO:0051329	interphase of mitotic cell cycle	8	5.62	GO:0000278, GO:0051325	mitotic cell cycle, interphase
6	GO:0051960	regulation of nervous system development	20	5.62	GO:0007399, GO:2000026	nervous system development, regulation of multicellular organismal development
3	GO:0050817	coagulation	12	5.62	GO:0032501	multicellular organismal process
5	GO:0030168	platelet activation	6	5.6	GO:0001775, GO:0007596	cell activation, blood coagulation
4	GO:0060021	palate development	6	5.6	GO:0048856	anatomical structure development
6	GO:0007219	Notch signaling pathway	6	5.6	GO:0007166	cell surface receptor signaling pathway
6	GO:0051216	cartilage development	8	5.58	GO:0061448, GO:0001501, GO:0048513	connective tissue development, skeletal system development, organ development
3	GO:0035637	multicellular organismal signaling	24	5.58	GO:0032501, GO:0023052	multicellular organismal process, signaling
8	GO:0009205	purine ribonucleoside triphosphate metabolic process	17	5.54	GO:0009199, GO:0009144, GO:0009150	ribonucleoside triphosphate metabolic process, purine nucleoside triphosphate metabolic process, purine ribonucleotide metabolic process
5	GO:0032870	cellular response to hormone stimulus	17	5.52	GO:0071310, GO:0071495, GO:0009725	cellular response to organic substance, cellular response to endogenous stimulus, response to hormone stimulus
8	GO:0090101	negative regulation of transmembrane receptor protein serine/threonine kinase signaling pathway	5	5.52	GO:0090092, GO:0009968, GO:0007178	regulation of transmembrane receptor protein serine/threonine kinase signaling pathway, negative regulation of signal transduction, transmembrane receptor protein serine/threonine kinase signaling pathway
6	GO:0048732	gland development	11	5.52	GO:0048513	organ development
4	GO:0044255	cellular lipid metabolic process	15	5.5	GO:0044237, GO:0006629	cellular metabolic process, lipid metabolic process
6	GO:0006281	DNA repair	6	5.48	GO:0006974, GO:0006259	response to DNA damage stimulus, DNA metabolic process
7	GO:0032869	cellular response to insulin stimulus	9	5.48	GO:0071375, GO:0032868	cellular response to peptide hormone stimulus, response to insulin stimulus
5	GO:0048878	chemical homeostasis	24	5.44	GO:0042592	homeostatic process
6	GO:0060284	regulation of cell development	23	5.44	GO:0045595, GO:0048468	regulation of cell differentiation, cell development
5	GO:0044057	regulation of system process	16	5.35	GO:0051239, GO:0003008	regulation of multicellular organismal process, system process
5	GO:0007050	cell cycle arrest	7	5.32	GO:0045786, GO:0022402	negative regulation of cell cycle, cell cycle process
7	GO:0030001	metal ion transport	15	5.3	GO:0006812	cation transport
8	GO:0006417	regulation of translation	9	5.29	GO:0032268, GO:0006412, GO:2000112, GO:0010608	regulation of cellular protein metabolic process, translation, regulation of cellular macromolecule biosynthetic process, posttranscriptional regulation of gene expression
8	GO:0000398	nuclear mRNA splicing, via spliceosome	7	5.3	GO:0006397, GO:0000377	mRNA processing, RNA splicing, via transesterification reactions with bulged adenosine as nucleophile
4	GO:0055082	cellular chemical homeostasis	21	5.28	GO:0048878, GO:0019725	chemical homeostasis, cellular homeostasis
5	GO:0065003	macromolecular complex assembly	21	5.27	GO:0043933, GO:0022607	macromolecular complex subunit organization, cellular component assembly
4	GO:0023061	signal release	15	5.28	GO:0003001, GO:0009987	generation of a signal involved in cell-cell signaling, cellular process
6	GO:0000902	cell morphogenesis	27	5.28	GO:0032989	cellular component morphogenesis
5	GO:0045926	negative regulation of growth	9	5.28	GO:0040007, GO:0048519, GO:0040008	growth, negative regulation of biological process, regulation of growth
6	GO:0031344	regulation of cell projection organization	14	5.26	GO:0030030, GO:0051128, GO:0050794	cell projection organization, regulation of cellular component organization, regulation of cellular process
7	GO:0042471	ear morphogenesis	5	5.26	GO:0048562, GO:0043583	embryonic organ morphogenesis, ear development
7	GO:0007067	mitosis	8	5.16	GO:0000087, GO:0022403, GO:0000280	M phase of mitotic cell cycle, cell cycle phase, nuclear division
7	GO:0040029	regulation of gene expression, epigenetic	8	5.17	GO:0010468	regulation of gene expression
7	GO:0010740	positive regulation of intracellular protein kinase cascade	10	5.16	GO:0010627, GO:0007243, GO:0009967	regulation of intracellular protein kinase cascade, intracellular protein kinase cascade, positive regulation of signal transduction
6	GO:0030855	epithelial cell differentiation	8	5.16	GO:0030154, GO:0060429	cell differentiation, epithelium development
6	GO:0051046	regulation of secretion	13	5.15	GO:0046903, GO:0051049	secretion, regulation of transport
7	GO:0019220	regulation of phosphate metabolic process	26	5.12	GO:0006796, GO:0051174	phosphate-containing compound metabolic process, regulation of phosphorus metabolic process
9	GO:0006511	ubiquitin-dependent protein catabolic process	9	5.1	GO:0019941	modification-dependent protein catabolic process
4	GO:0048609	multicellular organismal reproductive process	17	5.09	GO:0022414, GO:0032501, GO:0032504	reproductive process, multicellular organismal process, multicellular organism reproduction
11	GO:0071902	positive regulation of protein serine/threonine kinase activity	7	5.06	GO:0045860, GO:0071900	positive regulation of protein kinase activity, regulation of protein serine/threonine kinase activity
6	GO:0048232	male gamete generation	11	5.06	GO:0007276	gamete generation
5	GO:0043085	positive regulation of catalytic activity	19	5.02	GO:0050790, GO:0044093	regulation of catalytic activity, positive regulation of molecular function
7	GO:0010769	regulation of cell morphogenesis involved in differentiation	11	5.02	GO:0000904, GO:0022604, GO:0060284	cell morphogenesis involved in differentiation, regulation of cell morphogenesis, regulation of cell development
5	GO:0045165	cell fate commitment	8	5.01	GO:0048869, GO:0030154	cellular developmental process, cell differentiation
10	GO:0042059	negative regulation of epidermal growth factor receptor signaling pathway	5	5	GO:0042058, GO:0007173, GO:1901185	regulation of epidermal growth factor receptor signaling pathway, epidermal growth factor receptor signaling pathway, negative regulation of ERBB signaling pathway
4	GO:0009314	response to radiation	10	5	GO:0009628	response to abiotic stimulus
9	GO:0032088	negative regulation of NF-kappaB transcription factor activity	5	5	GO:0043433	negative regulation of sequence-specific DNA binding transcription factor activity
6	GO:0030198	extracellular matrix organization	6	5	GO:0043062	extracellular structure organization
9	GO:0043524	negative regulation of neuron apoptotic process	5	5	GO:0043066, GO:0043523, GO:0051402	negative regulation of apoptotic process, regulation of neuron apoptotic process, neuron apoptotic process
8	GO:0048011	nerve growth factor receptor signaling pathway	5	5	GO:0007169	transmembrane receptor protein tyrosine kinase signaling pathway
5	GO:0071456	cellular response to hypoxia	5	5	GO:0033554, GO:0001666, GO:0036294	cellular response to stress, response to hypoxia, cellular response to decreased oxygen levels
4	GO:0048610	cellular process involved in reproduction	10	4.95	GO:0022414, GO:0009987	reproductive process, cellular process
3	GO:0006807	nitrogen compound metabolic process	113	4.94	GO:0008152	metabolic process
8	GO:0048593	camera-type eye morphogenesis	7	4.93	GO:0043010, GO:0048592	camera-type eye development, eye morphogenesis
7	GO:0006325	chromatin organization	16	4.87	GO:0051276	chromosome organization
6	GO:0001822	kidney development	3	4.86	GO:0072001, GO:0048513	renal system development, organ development
7	GO:0043068	positive regulation of programmed cell death	12	4.85	GO:0012501, GO:0043067, GO:0010942	programmed cell death, regulation of programmed cell death, positive regulation of cell death
5	GO:0071822	protein complex subunit organization	18	4.85	GO:0043933	macromolecular complex subunit organization
3	GO:0001775	cell activation	14	4.85	GO:0009987	cellular process
9	GO:0046039	GTP metabolic process	12	4.83	GO:1901068, GO:0009205	guanosine-containing compound metabolic process, purine ribonucleoside triphosphate metabolic process
8	GO:1901069	guanosine-containing compound catabolic process	12	4.83	GO:1901068, GO:0046130	guanosine-containing compound metabolic process, purine ribonucleoside catabolic process
5	GO:0043086	negative regulation of catalytic activity	13	4.83	GO:0050790, GO:0044092	regulation of catalytic activity, negative regulation of molecular function
7	GO:0060070	canonical Wnt receptor signaling pathway	8	4.8	GO:0016055	Wnt receptor signaling pathway
6	GO:0045786	negative regulation of cell cycle	9	4.79	GO:0048523, GO:0051726, GO:0007049	negative regulation of cellular process, regulation of cell cycle, cell cycle
8	GO:0018105	peptidyl-serine phosphorylation	6	4.8	GO:0006468, GO:0018209	protein phosphorylation, peptidyl-serine modification
5	GO:0051240	positive regulation of multicellular organismal process	7	4.8	GO:0051239, GO:0032501, GO:0048518	regulation of multicellular organismal process, multicellular organismal process, positive regulation of biological process
5	GO:0060411	cardiac septum morphogenesis	6	4.8	GO:0003206, GO:0009653, GO:0003279	cardiac chamber morphogenesis, anatomical structure morphogenesis, cardiac septum development
7	GO:0042476	odontogenesis	7	4.78	GO:0009887	organ morphogenesis
4	GO:0070271	protein complex biogenesis	17	4.77	GO:0044085	cellular component biogenesis
7	GO:0042472	inner ear morphogenesis	4	4.76	GO:0048839, GO:0042471, GO:0048598	inner ear development, ear morphogenesis, embryonic morphogenesis
9	GO:0002221	pattern recognition receptor signaling pathway	3	4.75	GO:0002758	innate immune response-activating signal transduction
5	GO:0035270	endocrine system development	6	4.75	GO:0048731	system development
5	GO:0022603	regulation of anatomical structure morphogenesis	19	4.73	GO:0009653, GO:0050793	anatomical structure morphogenesis, regulation of developmental process
4	GO:0042592	homeostatic process	26	4.68	GO:0065008	regulation of biological quality
6	GO:0008584	male gonad development	6	4.68	GO:0008406, GO:0046546	gonad development, development of primary male sexual characteristics
7	GO:0048706	embryonic skeletal system development	9	4.65	GO:0001501, GO:0043009	skeletal system development, chordate embryonic development
3	GO:0050673	epithelial cell proliferation	8	4.66	GO:0008283	cell proliferation
5	GO:0060541	respiratory system development	8	4.65	GO:0048731	system development
5	GO:0030522	intracellular receptor mediated signaling pathway	11	4.61	GO:0007165	signal transduction
7	GO:0030326	embryonic limb morphogenesis	4	4.6	GO:0035113, GO:0035108	embryonic appendage morphogenesis, limb morphogenesis
9	GO:0030512	negative regulation of transforming growth factor beta receptor signaling pathway	5	4.6	GO:0090101, GO:0007179, GO:0017015	negative regulation of transmembrane receptor protein serine/threonine kinase signaling pathway, transforming growth factor beta receptor signaling pathway, regulation of transforming growth factor beta receptor signaling pathway
7	GO:0007605	sensory perception of sound	5	4.6	GO:0050954	sensory perception of mechanical stimulus
8	GO:0043010	camera-type eye development	10	4.59	GO:0001654	eye development
7	GO:0032269	negative regulation of cellular protein metabolic process	12	4.58	GO:0044267, GO:0032268, GO:0031324, GO:0051248	cellular protein metabolic process, regulation of cellular protein metabolic process, negative regulation of cellular metabolic process, negative regulation of protein metabolic process
7	GO:0006875	cellular metal ion homeostasis	10	4.57	GO:0055065, GO:0030003	metal ion homeostasis, cellular cation homeostasis
6	GO:0010564	regulation of cell cycle process	9	4.56	GO:0022402, GO:0051726	cell cycle process, regulation of cell cycle
5	GO:0006508	proteolysis	13	4.56	GO:0019538	protein metabolic process
6	GO:0003206	cardiac chamber morphogenesis	7	4.54	GO:0003007, GO:0009653, GO:0003205	heart morphogenesis, anatomical structure morphogenesis, cardiac chamber development
7	GO:0018193	peptidyl-amino acid modification	14	4.51	GO:0006464	cellular protein modification process
5	GO:0008544	epidermis development	7	4.49	GO:0009888, GO:0048513	tissue development, organ development
9	GO:0007254	JNK cascade	9	4.48	GO:0051403	stress-activated MAPK cascade
7	GO:0051347	positive regulation of transferase activity	15	4.45	GO:0043085, GO:0051338	positive regulation of catalytic activity, regulation of transferase activity
6	GO:0032990	cell part morphogenesis	24	4.45	GO:0032989	cellular component morphogenesis
6	GO:0031345	negative regulation of cell projection organization	7	4.44	GO:0048523, GO:0030030, GO:0031344, GO:0051129	negative regulation of cellular process, cell projection organization, regulation of cell projection organization, negative regulation of cellular component organization
6	GO:0031346	positive regulation of cell projection organization	8	4.44	GO:0030030, GO:0048522, GO:0031344, GO:0051130	cell projection organization, positive regulation of cellular process, regulation of cell projection organization, positive regulation of cellular component organization
9	GO:0042326	negative regulation of phosphorylation	8	4.43	GO:0045936, GO:0016310, GO:0042325	negative regulation of phosphate metabolic process, phosphorylation, regulation of phosphorylation
6	GO:0019827	stem cell maintenance	6	4.4	GO:0045596, GO:0048864, GO:0032502	negative regulation of cell differentiation, stem cell development, developmental process
6	GO:0050804	regulation of synaptic transmission	9	4.4	GO:0051969, GO:0007268	regulation of transmission of nerve impulse, synaptic transmission
9	GO:0046034	ATP metabolic process	6	4.4	GO:0009205	purine ribonucleoside triphosphate metabolic process
5	GO:0048608	reproductive structure development	11	4.4	GO:0003006, GO:0048856	developmental process involved in reproduction, anatomical structure development
7	GO:0050679	positive regulation of epithelial cell proliferation	6	4.4	GO:0050673, GO:0008284, GO:0050678	epithelial cell proliferation, positive regulation of cell proliferation, regulation of epithelial cell proliferation
7	GO:0031647	regulation of protein stability	6	4.4	GO:0010608, GO:0065008	posttranscriptional regulation of gene expression, regulation of biological quality
4	GO:0006979	response to oxidative stress	7	4.38	GO:0042221, GO:0006950	response to chemical stimulus, response to stress
7	GO:0002521	leukocyte differentiation	8	4.36	GO:0030097, GO:0030154	hemopoiesis, cell differentiation
5	GO:0048545	response to steroid hormone stimulus	9	4.34	GO:0009725	response to hormone stimulus
5	GO:2000145	regulation of cell motility	10	4.31	GO:0051270, GO:0048870, GO:0040012	regulation of cellular component movement, cell motility, regulation of locomotion
6	GO:0032868	response to insulin stimulus	10	4.29	GO:0043434	response to peptide hormone stimulus
5	GO:0006811	ion transport	16	4.29	GO:0006810	transport
3	GO:0009056	catabolic process	34	4.28	GO:0008152	metabolic process
5	GO:0045444	fat cell differentiation	6	4.28	GO:0030154	cell differentiation
3	GO:0044085	cellular component biogenesis	30	4.22	GO:0071840	cellular component organization or biogenesis
7	GO:0006342	chromatin silencing	3	4.2	GO:0045892, GO:0045814, GO:0016458	negative regulation of transcription, DNA-dependent, negative regulation of gene expression, epigenetic, gene silencing
4	GO:0009791	post-embryonic development	4	4.2	GO:0007275, GO:0032502	multicellular organismal development, developmental process
6	GO:0050678	regulation of epithelial cell proliferation	8	4.2	GO:0050673, GO:0042127	epithelial cell proliferation, regulation of cell proliferation
7	GO:0007088	regulation of mitosis	5	4.2	GO:0007067, GO:0051783, GO:0007346, GO:0010564	mitosis, regulation of nuclear division, regulation of mitotic cell cycle, regulation of cell cycle process
4	GO:0007611	learning or memory	8	4.15	GO:0007610, GO:0050890	behavior, cognition
4	GO:0040012	regulation of locomotion	12	4.16	GO:0050789, GO:0040011	regulation of biological process, locomotion
6	GO:0007346	regulation of mitotic cell cycle	7	4.12	GO:0051726, GO:0000278	regulation of cell cycle, mitotic cell cycle
5	GO:0022403	cell cycle phase	15	4.1	GO:0022402	cell cycle process
6	GO:0043405	regulation of MAP kinase activity	6	4.1	GO:0009966, GO:0071900	regulation of signal transduction, regulation of protein serine/threonine kinase activity
3	GO:0048589	developmental growth	8	4.05	GO:0040007, GO:0032502	growth, developmental process
4	GO:0007276	gamete generation	12	4.06	GO:0048609, GO:0019953	multicellular organismal reproductive process, sexual reproduction
4	GO:0045137	development of primary sexual characteristics	11	4.04	GO:0007548, GO:0003006, GO:0007275	sex differentiation, developmental process involved in reproduction, multicellular organismal development
5	GO:0051051	negative regulation of transport	9	4.05	GO:0006810, GO:0048519, GO:0051049	transport, negative regulation of biological process, regulation of transport
5	GO:0051050	positive regulation of transport	13	4.05	GO:0006810, GO:0051049, GO:0048518	transport, regulation of transport, positive regulation of biological process
7	GO:0030098	lymphocyte differentiation	5	4.05	GO:0046649, GO:0002521	lymphocyte activation, leukocyte differentiation
5	GO:0009416	response to light stimulus	6	4.04	GO:0009314	response to radiation
9	GO:0001933	negative regulation of protein phosphorylation	6	4.05	GO:0006468, GO:0031400, GO:0042326, GO:0001932	protein phosphorylation, negative regulation of protein modification process, negative regulation of phosphorylation, regulation of protein phosphorylation
3	GO:0051301	cell division	6	4.02	GO:0009987	cellular process
6	GO:0034220	ion transmembrane transport	8	4.02	GO:0055085, GO:0006811	transmembrane transport, ion transport
5	GO:0003148	outflow tract septum morphogenesis	4	4	GO:0003151, GO:0060411	outflow tract morphogenesis, cardiac septum morphogenesis
8	GO:0006367	transcription initiation from RNA polymerase II promoter	4	4	GO:0006352, GO:0006366	DNA-dependent transcription, initiation, transcription from RNA polymerase II promoter
7	GO:0007613	memory	4	4	GO:0007611	learning or memory
8	GO:0001938	positive regulation of endothelial cell proliferation	4	4	GO:0001935, GO:0001936, GO:0050679	endothelial cell proliferation, regulation of endothelial cell proliferation, positive regulation of epithelial cell proliferation
7	GO:0001764	neuron migration	4	4	GO:0016477, GO:0048699	cell migration, generation of neurons
5	GO:0007286	spermatid development	4	4	GO:0048515, GO:0007281	spermatid differentiation, germ cell development
8	GO:0035019	somatic stem cell maintenance	4	4	GO:0019827	stem cell maintenance
5	GO:0001570	vasculogenesis	4	4	GO:0030154, GO:0048514	cell differentiation, blood vessel morphogenesis
8	GO:0043552	positive regulation of phosphatidylinositol 3-kinase activity	4	4	GO:0090218, GO:0043551	positive regulation of lipid kinase activity, regulation of phosphatidylinositol 3-kinase activity
7	GO:0006195	purine nucleotide catabolic process	17	3.99	GO:0072523, GO:0006163, GO:0009166	purine-containing compound catabolic process, purine nucleotide metabolic process, nucleotide catabolic process
8	GO:0009146	purine nucleoside triphosphate catabolic process	15	3.98	GO:0009143, GO:0006195, GO:0009144	nucleoside triphosphate catabolic process, purine nucleotide catabolic process, purine nucleoside triphosphate metabolic process
6	GO:0009154	purine ribonucleotide catabolic process	15	3.98	GO:0009261, GO:0006195, GO:0009150	ribonucleotide catabolic process, purine nucleotide catabolic process, purine ribonucleotide metabolic process
7	GO:0051248	negative regulation of protein metabolic process	14	3.97	GO:0051246, GO:0019538, GO:0010605	regulation of protein metabolic process, protein metabolic process, negative regulation of macromolecule metabolic process
6	GO:0009203	ribonucleoside triphosphate catabolic process	15	3.98	GO:0009261, GO:0009143, GO:0009199	ribonucleotide catabolic process, nucleoside triphosphate catabolic process, ribonucleoside triphosphate metabolic process
11	GO:0010976	positive regulation of neuron projection development	5	3.96	GO:0031175, GO:0031346, GO:0010975	neuron projection development, positive regulation of cell projection organization, regulation of neuron projection development
5	GO:0034599	cellular response to oxidative stress	5	3.96	GO:0033554, GO:0070887, GO:0006979	cellular response to stress, cellular response to chemical stimulus, response to oxidative stress
11	GO:0050770	regulation of axonogenesis	6	3.96	GO:0007409, GO:0010769, GO:0010975	axonogenesis, regulation of cell morphogenesis involved in differentiation, regulation of neuron projection development
5	GO:0051338	regulation of transferase activity	21	3.94	GO:0050790	regulation of catalytic activity
5	GO:0070848	response to growth factor stimulus	13	3.94	GO:0010033	response to organic substance
5	GO:0006873	cellular ion homeostasis	17	3.92	GO:0050801, GO:0055082	ion homeostasis, cellular chemical homeostasis
6	GO:0019216	regulation of lipid metabolic process	13	3.93	GO:0006629, GO:0080090	lipid metabolic process, regulation of primary metabolic process
4	GO:0030036	actin cytoskeleton organization	7	3.91	GO:0007010, GO:0030029	cytoskeleton organization, actin filament-based process
6	GO:0010942	positive regulation of cell death	13	3.91	GO:0008219, GO:0048522, GO:0010941	cell death, positive regulation of cellular process, regulation of cell death
5	GO:0061448	connective tissue development	9	3.91	GO:0009888	tissue development
6	GO:0016055	Wnt receptor signaling pathway	9	3.88	GO:0007166	cell surface receptor signaling pathway
7	GO:0051259	protein oligomerization	7	3.88	GO:0006461	protein complex assembly
3	GO:0051674	localization of cell	18	3.88	GO:0051179	localization
7	GO:0001656	metanephros development	3	3.87	GO:0001822	kidney development
7	GO:0015672	monovalent inorganic cation transport	7	3.86	GO:0006812	cation transport
6	GO:0007517	muscle organ development	12	3.86	GO:0048513, GO:0061061	organ development, muscle structure development
8	GO:0045937	positive regulation of phosphate metabolic process	19	3.82	GO:0006796, GO:0010562, GO:0019220	phosphate-containing compound metabolic process, positive regulation of phosphorus metabolic process, regulation of phosphate metabolic process
5	GO:0014070	response to organic cyclic compound	5	3.82	GO:0010033	response to organic substance
10	GO:0050771	negative regulation of axonogenesis	4	3.8	GO:0007409, GO:0050770, GO:0031345, GO:0050768	axonogenesis, regulation of axonogenesis, negative regulation of cell projection organization, negative regulation of neurogenesis
7	GO:0032526	response to retinoic acid	5	3.8	GO:0033189	response to vitamin A
6	GO:0045667	regulation of osteoblast differentiation	5	3.8	GO:0045595, GO:0030278, GO:0001649	regulation of cell differentiation, regulation of ossification, osteoblast differentiation
8	GO:0007266	Rho protein signal transduction	4	3.78	GO:0007265	Ras protein signal transduction
9	GO:0017015	regulation of transforming growth factor beta receptor signaling pathway	6	3.76	GO:0090092, GO:0007179	regulation of transmembrane receptor protein serine/threonine kinase signaling pathway, transforming growth factor beta receptor signaling pathway
8	GO:0031400	negative regulation of protein modification process	6	3.75	GO:0032269, GO:0031399, GO:0006464	negative regulation of cellular protein metabolic process, regulation of protein modification process, cellular protein modification process
7	GO:0006306	DNA methylation	2	3.74	GO:0040029, GO:0043414, GO:0006305	regulation of gene expression, epigenetic, macromolecule methylation, DNA alkylation
7	GO:0016570	histone modification	8	3.74	GO:0006464, GO:0016569	cellular protein modification process, covalent chromatin modification
8	GO:0046328	regulation of JNK cascade	7	3.74	GO:0032872, GO:0007254	regulation of stress-activated MAPK cascade, JNK cascade
8	GO:0006813	potassium ion transport	5	3.72	GO:0030001, GO:0015672	metal ion transport, monovalent inorganic cation transport
7	GO:0000165	MAPK cascade	14	3.73	GO:0007243	intracellular protein kinase cascade
6	GO:0051146	striated muscle cell differentiation	7	3.7	GO:0042692	muscle cell differentiation
8	GO:0051403	stress-activated MAPK cascade	10	3.69	GO:0031098, GO:0000165	stress-activated protein kinase signaling cascade, MAPK cascade
9	GO:0050768	negative regulation of neurogenesis	8	3.67	GO:0022008, GO:0010721, GO:0050767	neurogenesis, negative regulation of cell development, regulation of neurogenesis
4	GO:0043933	macromolecular complex subunit organization	22	3.68	GO:0016043	cellular component organization
7	GO:0007265	Ras protein signal transduction	6	3.66	GO:0007264	small GTPase mediated signal transduction
6	GO:0021675	nerve development	9	3.66	GO:0007399, GO:0048856	nervous system development, anatomical structure development
6	GO:0071375	cellular response to peptide hormone stimulus	10	3.65	GO:0043434, GO:0032870	response to peptide hormone stimulus, cellular response to hormone stimulus
5	GO:0031667	response to nutrient levels	12	3.64	GO:0009991	response to extracellular stimulus
6	GO:0042176	regulation of protein catabolic process	7	3.64	GO:0030163, GO:0051246, GO:0009894	protein catabolic process, regulation of protein metabolic process, regulation of catabolic process
8	GO:0006874	cellular calcium ion homeostasis	6	3.62	GO:0072503, GO:0006875, GO:0055074	cellular divalent inorganic cation homeostasis, cellular metal ion homeostasis, calcium ion homeostasis
5	GO:0051336	regulation of hydrolase activity	13	3.63	GO:0050790	regulation of catalytic activity
8	GO:0043523	regulation of neuron apoptotic process	6	3.6	GO:0051402, GO:0042981	neuron apoptotic process, regulation of apoptotic process
6	GO:0006887	exocytosis	7	3.61	GO:0032940, GO:0016192	secretion by cell, vesicle-mediated transport
7	GO:0006006	glucose metabolic process	6	3.61	GO:0019318	hexose metabolic process
5	GO:0051591	response to cAMP	4	3.6	GO:0010033	response to organic substance
5	GO:0036293	response to decreased oxygen levels	8	3.6	GO:0070482	response to oxygen levels
6	GO:0022604	regulation of cell morphogenesis	11	3.61	GO:0051128, GO:0050794, GO:0022603, GO:0000902	regulation of cellular component organization, regulation of cellular process, regulation of anatomical structure morphogenesis, cell morphogenesis
7	GO:0030099	myeloid cell differentiation	6	3.61	GO:0030097, GO:0030154	hemopoiesis, cell differentiation
4	GO:0022602	ovulation cycle process	5	3.6	GO:0048511, GO:0042698	rhythmic process, ovulation cycle
6	GO:0035051	cardiac cell differentiation	3	3.6	GO:0007507, GO:0030154	heart development, cell differentiation
7	GO:0055010	ventricular cardiac muscle tissue morphogenesis	4	3.6	GO:0055008, GO:0003229, GO:0003208	cardiac muscle tissue morphogenesis, ventricular cardiac muscle tissue development, cardiac ventricle morphogenesis
2	GO:0048511	rhythmic process	8	3.58	GO:0008150	biological_process
7	GO:0010741	negative regulation of intracellular protein kinase cascade	5	3.58	GO:0007243, GO:0010627, GO:0009968	intracellular protein kinase cascade, regulation of intracellular protein kinase cascade, negative regulation of signal transduction
6	GO:0032496	response to lipopolysaccharide	5	3.56	GO:0002237	response to molecule of bacterial origin
6	GO:0006163	purine nucleotide metabolic process	20	3.54	GO:0009117, GO:0072521	nucleotide metabolic process, purine-containing compound metabolic process
3	GO:0019725	cellular homeostasis	21	3.53	GO:0042592, GO:0009987	homeostatic process, cellular process
8	GO:0043410	positive regulation of MAPK cascade	5	3.52	GO:0043408, GO:0000165, GO:0010740	regulation of MAPK cascade, MAPK cascade, positive regulation of intracellular protein kinase cascade
6	GO:0002009	morphogenesis of an epithelium	10	3.53	GO:0048729, GO:0060429	tissue morphogenesis, epithelium development
5	GO:0032989	cellular component morphogenesis	28	3.53	GO:0048869, GO:0009653, GO:0016043	cellular developmental process, anatomical structure morphogenesis, cellular component organization
9	GO:0006917	induction of apoptosis	6	3.54	GO:0043065, GO:0012502	positive regulation of apoptotic process, induction of programmed cell death
4	GO:0070727	cellular macromolecule localization	17	3.5	GO:0033036, GO:0051641	macromolecule localization, cellular localization
5	GO:0050890	cognition	9	3.49	GO:0050877	neurological system process
8	GO:0030335	positive regulation of cell migration	4	3.48	GO:0030334, GO:0016477, GO:2000147	regulation of cell migration, cell migration, positive regulation of cell motility
7	GO:2000146	negative regulation of cell motility	7	3.49	GO:2000145, GO:0048870, GO:0040013, GO:0051271	regulation of cell motility, cell motility, negative regulation of locomotion, negative regulation of cellular component movement
5	GO:0006954	inflammatory response	5	3.48	GO:0006952, GO:0009611	defense response, response to wounding
5	GO:0002520	immune system development	14	3.47	GO:0002376, GO:0048731	immune system process, system development
6	GO:0021953	central nervous system neuron differentiation	7	3.46	GO:0007417, GO:0030182	central nervous system development, neuron differentiation
9	GO:0016569	covalent chromatin modification	9	3.45	GO:0016568	chromatin modification
7	GO:0034765	regulation of ion transmembrane transport	6	3.44	GO:0043269, GO:0034762, GO:0034220	regulation of ion transport, regulation of transmembrane transport, ion transmembrane transport
5	GO:0007548	sex differentiation	12	3.43	GO:0003006	developmental process involved in reproduction
7	GO:0030072	peptide hormone secretion	7	3.43	GO:0046879, GO:0002790	hormone secretion, peptide secretion
6	GO:0030902	hindbrain development	5	3.43	GO:0007420, GO:0048856	brain development, anatomical structure development
8	GO:0048813	dendrite morphogenesis	5	3.4	GO:0016358, GO:0048667, GO:0048812	dendrite development, cell morphogenesis involved in neuron differentiation, neuron projection morphogenesis
3	GO:0016044	cellular membrane organization	5	3.39	GO:0061024, GO:0009987	membrane organization, cellular process
10	GO:0000209	protein polyubiquitination	3	3.4	GO:0016567	protein ubiquitination
7	GO:0006352	DNA-dependent transcription, initiation	5	3.4	GO:0006351, GO:0032774	transcription, DNA-dependent, RNA biosynthetic process
8	GO:0043551	regulation of phosphatidylinositol 3-kinase activity	5	3.4	GO:0043550	regulation of lipid kinase activity
8	GO:0043408	regulation of MAPK cascade	11	3.38	GO:0010627, GO:0000165	regulation of intracellular protein kinase cascade, MAPK cascade
8	GO:0030217	T cell differentiation	4	3.39	GO:0042110, GO:0030098	T cell activation, lymphocyte differentiation
7	GO:0043623	cellular protein complex assembly	6	3.38	GO:0034622, GO:0006461	cellular macromolecular complex assembly, protein complex assembly
7	GO:0061039	ovum-producing ovary development	5	3.36	GO:0008585	female gonad development
5	GO:0001649	osteoblast differentiation	6	3.36	GO:0001503, GO:0030154	ossification, cell differentiation
5	GO:0051241	negative regulation of multicellular organismal process	7	3.36	GO:0032501, GO:0051239, GO:0048519	multicellular organismal process, regulation of multicellular organismal process, negative regulation of biological process
7	GO:0008277	regulation of G-protein coupled receptor protein signaling pathway	4	3.36	GO:0009966, GO:0007186	regulation of signal transduction, G-protein coupled receptor signaling pathway
6	GO:0051325	interphase	8	3.37	GO:0022403	cell cycle phase
3	GO:0032259	methylation	4	3.34	GO:0008152	metabolic process
7	GO:0042593	glucose homeostasis	5	3.33	GO:0033500	carbohydrate homeostasis
6	GO:0016458	gene silencing	7	3.33	GO:0010629, GO:0009987	negative regulation of gene expression, cellular process
8	GO:0009199	ribonucleoside triphosphate metabolic process	17	3.32	GO:0009259, GO:0009141	ribonucleotide metabolic process, nucleoside triphosphate metabolic process
5	GO:0001655	urogenital system development	5	3.32	GO:0048731	system development
7	GO:0009144	purine nucleoside triphosphate metabolic process	17	3.32	GO:0009141, GO:0006163	nucleoside triphosphate metabolic process, purine nucleotide metabolic process
7	GO:0009150	purine ribonucleotide metabolic process	17	3.32	GO:0009259, GO:0006163	ribonucleotide metabolic process, purine nucleotide metabolic process
5	GO:0008015	blood circulation	9	3.31	GO:0003013	circulatory system process
6	GO:0006812	cation transport	15	3.31	GO:0006811	ion transport
5	GO:0006836	neurotransmitter transport	6	3.32	GO:0006810	transport
6	GO:0021510	spinal cord development	6	3.32	GO:0007417, GO:0048856	central nervous system development, anatomical structure development
4	GO:0046649	lymphocyte activation	8	3.29	GO:0045321	leukocyte activation
6	GO:0072001	renal system development	3	3.27	GO:0001655, GO:0048731	urogenital system development, system development
8	GO:0017148	negative regulation of translation	5	3.28	GO:0006417, GO:0006412, GO:0032269, GO:2000113	regulation of translation, translation, negative regulation of cellular protein metabolic process, negative regulation of cellular macromolecule biosynthetic process
6	GO:0048565	digestive tract development	5	3.28	GO:0055123, GO:0048856	digestive system development, anatomical structure development
3	GO:0019953	sexual reproduction	13	3.25	GO:0000003	reproduction
9	GO:0050769	positive regulation of neurogenesis	7	3.24	GO:0022008, GO:0050767, GO:0010720	neurogenesis, regulation of neurogenesis, positive regulation of cell development
5	GO:0032880	regulation of protein localization	7	3.23	GO:0032879, GO:0008104	regulation of localization, protein localization
5	GO:0030278	regulation of ossification	7	3.24	GO:0051239, GO:0001503	regulation of multicellular organismal process, ossification
7	GO:0090276	regulation of peptide hormone secretion	6	3.24	GO:0046883, GO:0002791, GO:0030072	regulation of hormone secretion, regulation of peptide secretion, peptide hormone secretion
7	GO:0002573	myeloid leukocyte differentiation	5	3.22	GO:0030099, GO:0002521	myeloid cell differentiation, leukocyte differentiation
6	GO:0008585	female gonad development	6	3.22	GO:0008406, GO:0046545	gonad development, development of primary female sexual characteristics
5	GO:0006986	response to unfolded protein	4	3.22	GO:0035966	response to topologically incorrect protein
6	GO:0030518	intracellular steroid hormone receptor signaling pathway	7	3.22	GO:0030522	intracellular receptor mediated signaling pathway
6	GO:0002790	peptide secretion	8	3.2	GO:0046903, GO:0015833	secretion, peptide transport
7	GO:0030521	androgen receptor signaling pathway	4	3.2	GO:0030518	intracellular steroid hormone receptor signaling pathway
8	GO:0050796	regulation of insulin secretion	4	3.2	GO:0090276, GO:0030073	regulation of peptide hormone secretion, insulin secretion
10	GO:0031398	positive regulation of protein ubiquitination	4	3.2	GO:0016567, GO:0031396, GO:0031401	protein ubiquitination, regulation of protein ubiquitination, positive regulation of protein modification process
6	GO:0016197	endosomal transport	4	3.2	GO:0016192, GO:0046907	vesicle-mediated transport, intracellular transport
8	GO:0008306	associative learning	4	3.2	GO:0007612	learning
8	GO:0051260	protein homooligomerization	4	3.2	GO:0051259	protein oligomerization
7	GO:0006892	post-Golgi vesicle-mediated transport	4	3.2	GO:0048193	Golgi vesicle transport
7	GO:0010001	glial cell differentiation	5	3.21	GO:0042063, GO:0030154	gliogenesis, cell differentiation
8	GO:0009749	response to glucose stimulus	4	3.22	GO:0009746	response to hexose stimulus
5	GO:0048754	branching morphogenesis of a tube	4	3.2	GO:0001763, GO:0035239	morphogenesis of a branching structure, tube morphogenesis
5	GO:0060627	regulation of vesicle-mediated transport	8	3.19	GO:0016192, GO:0050794, GO:0051049	vesicle-mediated transport, regulation of cellular process, regulation of transport
6	GO:0048844	artery morphogenesis	3	3.2	GO:0048514, GO:0060840	blood vessel morphogenesis, artery development
5	GO:0033273	response to vitamin	7	3.17	GO:0007584	response to nutrient
9	GO:0000377	RNA splicing, via transesterification reactions with bulged adenosine as nucleophile	7	3.18	GO:0000375	RNA splicing, via transesterification reactions
6	GO:0033043	regulation of organelle organization	10	3.17	GO:0051128, GO:0006996, GO:0050794	regulation of cellular component organization, organelle organization, regulation of cellular process
4	GO:0003001	generation of a signal involved in cell-cell signaling	15	3.17	GO:0007267, GO:0009987	cell-cell signaling, cellular process
10	GO:0043406	positive regulation of MAP kinase activity	4	3.16	GO:0071902, GO:0043405	positive regulation of protein serine/threonine kinase activity, regulation of MAP kinase activity
6	GO:0001890	placenta development	5	3.16	GO:0048513	organ development
5	GO:0080134	regulation of response to stress	16	3.17	GO:0006950, GO:0048583	response to stress, regulation of response to stimulus
5	GO:0006869	lipid transport	5	3.14	GO:0071702, GO:0010876	organic substance transport, lipid localization
7	GO:0048167	regulation of synaptic plasticity	5	3.14	GO:0050804, GO:0065008	regulation of synaptic transmission, regulation of biological quality
8	GO:0008380	RNA splicing	9	3.14	GO:0006396	RNA processing
6	GO:0007224	smoothened signaling pathway	3	3.12	GO:0007166	cell surface receptor signaling pathway
5	GO:0034762	regulation of transmembrane transport	10	3.13	GO:0055085, GO:0050794, GO:0051049	transmembrane transport, regulation of cellular process, regulation of transport
6	GO:0021602	cranial nerve morphogenesis	5	3.12	GO:0021545, GO:0009653	cranial nerve development, anatomical structure morphogenesis
5	GO:0080135	regulation of cellular response to stress	11	3.11	GO:0033554, GO:0080134, GO:0050794	cellular response to stress, regulation of response to stress, regulation of cellular process
9	GO:0043281	regulation of cysteine-type endopeptidase activity involved in apoptotic process	5	3.12	GO:0006915, GO:2000116	apoptotic process, regulation of cysteine-type endopeptidase activity
6	GO:0000087	M phase of mitotic cell cycle	8	3.1	GO:0000278, GO:0000279	mitotic cell cycle, M phase
7	GO:0000280	nuclear division	8	3.1	GO:0048285	organelle fission
6	GO:0046879	hormone secretion	9	3.07	GO:0032940, GO:0023061, GO:0009914	secretion by cell, signal release, hormone transport
6	GO:0051174	regulation of phosphorus metabolic process	26	3.07	GO:0031323, GO:0006793	regulation of cellular metabolic process, phosphorus metabolic process
8	GO:0019941	modification-dependent protein catabolic process	9	3.06	GO:0043632, GO:0051603	modification-dependent macromolecule catabolic process, proteolysis involved in cellular protein catabolic process
6	GO:0031329	regulation of cellular catabolic process	11	3.06	GO:0044248, GO:0031323, GO:0009894	cellular catabolic process, regulation of cellular metabolic process, regulation of catabolic process
4	GO:0002682	regulation of immune system process	13	3.07	GO:0050789, GO:0002376	regulation of biological process, immune system process
4	GO:0005975	carbohydrate metabolic process	10	3.05	GO:0044238	primary metabolic process
8	GO:0006605	protein targeting	9	3.06	GO:0006886	intracellular protein transport
3	GO:0006955	immune response	11	3.06	GO:0050896, GO:0002376	response to stimulus, immune system process
3	GO:0032504	multicellular organism reproduction	17	3.05	GO:0032501, GO:0000003	multicellular organismal process, reproduction
3	GO:0055114	oxidation-reduction process	9	3	GO:0008152	metabolic process
7	GO:0048661	positive regulation of smooth muscle cell proliferation	3	3	GO:0048660, GO:0048659, GO:0008284	regulation of smooth muscle cell proliferation, smooth muscle cell proliferation, positive regulation of cell proliferation
8	GO:0090090	negative regulation of canonical Wnt receptor signaling pathway	3	3	GO:0060828, GO:0060070, GO:0030178	regulation of canonical Wnt receptor signaling pathway, canonical Wnt receptor signaling pathway, negative regulation of Wnt receptor signaling pathway
11	GO:0043154	negative regulation of cysteine-type endopeptidase activity involved in apoptotic process	3	3	GO:0006915, GO:0043281, GO:2000117	apoptotic process, regulation of cysteine-type endopeptidase activity involved in apoptotic process, negative regulation of cysteine-type endopeptidase activity
6	GO:0060412	ventricular septum morphogenesis	3	3	GO:0060411, GO:0003281	cardiac septum morphogenesis, ventricular septum development
7	GO:0045599	negative regulation of fat cell differentiation	3	3	GO:0045598, GO:0045596, GO:0045444	regulation of fat cell differentiation, negative regulation of cell differentiation, fat cell differentiation
7	GO:0001755	neural crest cell migration	3	3	GO:0014032, GO:0001667	neural crest cell development, ameboidal cell migration
6	GO:0014706	striated muscle tissue development	9	3	GO:0060537	muscle tissue development
9	GO:1901185	negative regulation of ERBB signaling pathway	5	3	GO:0038127, GO:0009968, GO:1901184	ERBB signaling pathway, negative regulation of signal transduction, regulation of ERBB signaling pathway
6	GO:0071230	cellular response to amino acid stimulus	3	3	GO:0043200, GO:0071418, GO:0071229	response to amino acid stimulus, cellular response to amine stimulus, cellular response to acid
8	GO:0043123	positive regulation of I-kappaB kinase/NF-kappaB cascade	3	3	GO:0043122, GO:0007249, GO:0010740	regulation of I-kappaB kinase/NF-kappaB cascade, I-kappaB kinase/NF-kappaB cascade, positive regulation of intracellular protein kinase cascade
8	GO:0043122	regulation of I-kappaB kinase/NF-kappaB cascade	5	3	GO:0010627, GO:0007249	regulation of intracellular protein kinase cascade, I-kappaB kinase/NF-kappaB cascade
10	GO:0045768	positive regulation of anti-apoptosis	3	3	GO:0006916, GO:0045767, GO:0048518	anti-apoptosis, regulation of anti-apoptosis, positive regulation of biological process
6	GO:0036294	cellular response to decreased oxygen levels	5	3	GO:0036293, GO:0071453	response to decreased oxygen levels, cellular response to oxygen levels
8	GO:0001541	ovarian follicle development	3	3	GO:0061039, GO:0022602	ovum-producing ovary development, ovulation cycle process
5	GO:0043062	extracellular structure organization	6	3	GO:0071842	cellular component organization at cellular level
7	GO:0045879	negative regulation of smoothened signaling pathway	3	3	GO:0007224, GO:0009968, GO:0008589	smoothened signaling pathway, negative regulation of signal transduction, regulation of smoothened signaling pathway
7	GO:0042733	embryonic digit morphogenesis	3	3	GO:0030326, GO:0048598	embryonic limb morphogenesis, embryonic morphogenesis
6	GO:0045766	positive regulation of angiogenesis	3	3	GO:0001525, GO:0051094, GO:0045765	angiogenesis, positive regulation of developmental process, regulation of angiogenesis
10	GO:0045665	negative regulation of neuron differentiation	3	3	GO:0045596, GO:0030182, GO:0045664	negative regulation of cell differentiation, neuron differentiation, regulation of neuron differentiation
6	GO:0033280	response to vitamin D	3	3	GO:0033273	response to vitamin
10	GO:0070934	CRD-mediated mRNA stabilization	3	3	GO:0048255	mRNA stabilization
5	GO:0010038	response to metal ion	5	3	GO:0010035	response to inorganic substance
8	GO:0006406	mRNA export from nucleus	3	3	GO:0006405, GO:0051028	RNA export from nucleus, mRNA transport
8	GO:0060828	regulation of canonical Wnt receptor signaling pathway	5	3	GO:0030111, GO:0060070	regulation of Wnt receptor signaling pathway, canonical Wnt receptor signaling pathway
6	GO:0048660	regulation of smooth muscle cell proliferation	5	3	GO:0042127, GO:0048659	regulation of cell proliferation, smooth muscle cell proliferation
7	GO:0030199	collagen fibril organization	3	3	GO:0030198	extracellular matrix organization
10	GO:0045666	positive regulation of neuron differentiation	3	3	GO:0030182, GO:0045597, GO:0045664	neuron differentiation, positive regulation of cell differentiation, regulation of neuron differentiation
10	GO:0042058	regulation of epidermal growth factor receptor signaling pathway	5	3	GO:0007173, GO:1901184	epidermal growth factor receptor signaling pathway, regulation of ERBB signaling pathway
5	GO:0071702	organic substance transport	11	3.01	GO:0006810	transport
4	GO:0009636	response to toxin	3	3	GO:0042221	response to chemical stimulus
9	GO:0051092	positive regulation of NF-kappaB transcription factor activity	3	3	GO:0051091	positive regulation of sequence-specific DNA binding transcription factor activity
6	GO:0006457	protein folding	3	3	GO:0044267	cellular protein metabolic process
11	GO:0035278	negative regulation of translation involved in gene silencing by miRNA	3	3	GO:0040033, GO:0035195	negative regulation of translation, ncRNA-mediated, gene silencing by miRNA
8	GO:0071300	cellular response to retinoic acid	3	3	GO:0032526, GO:0071299	response to retinoic acid, cellular response to vitamin A
8	GO:0006200	ATP catabolic process	3	3	GO:0046034, GO:0009207	ATP metabolic process, purine ribonucleoside triphosphate catabolic process
6	GO:0007030	Golgi organization	3	3	GO:0006996	organelle organization
9	GO:0014068	positive regulation of phosphatidylinositol 3-kinase cascade	3	3	GO:0014065, GO:0014066, GO:0009967	phosphatidylinositol 3-kinase cascade, regulation of phosphatidylinositol 3-kinase cascade, positive regulation of signal transduction
4	GO:0010035	response to inorganic substance	6	2.98	GO:0042221	response to chemical stimulus
5	GO:0007600	sensory perception	7	2.98	GO:0050877	neurological system process
8	GO:0042475	odontogenesis of dentin-containing tooth	4	2.96	GO:0042476	odontogenesis
7	GO:0002062	chondrocyte differentiation	4	2.96	GO:0051216, GO:0030154	cartilage development, cell differentiation
7	GO:0048592	eye morphogenesis	7	2.96	GO:0001654, GO:0009887	eye development, organ morphogenesis
10	GO:0000079	regulation of cyclin-dependent protein kinase activity	4	2.96	GO:0051726, GO:0071900	regulation of cell cycle, regulation of protein serine/threonine kinase activity
6	GO:0006631	fatty acid metabolic process	8	2.94	GO:0044255, GO:0032787	cellular lipid metabolic process, monocarboxylic acid metabolic process
7	GO:0007612	learning	5	2.92	GO:0007611	learning or memory
8	GO:0060840	artery development	4	2.92	GO:0001568	blood vessel development
4	GO:0008610	lipid biosynthetic process	7	2.92	GO:0006629, GO:0009058	lipid metabolic process, biosynthetic process
6	GO:0030031	cell projection assembly	3	2.92	GO:0030030, GO:0071844	cell projection organization, cellular component assembly at cellular level
5	GO:0048645	organ formation	5	2.92	GO:0048646, GO:0009887	anatomical structure formation involved in morphogenesis, organ morphogenesis
4	GO:0007626	locomotory behavior	4	2.92	GO:0007610	behavior
6	GO:0007269	neurotransmitter secretion	5	2.92	GO:0001505, GO:0032940, GO:0023061, GO:0006836	regulation of neurotransmitter levels, secretion by cell, signal release, neurotransmitter transport
8	GO:0030073	insulin secretion	5	2.92	GO:0030072	peptide hormone secretion
7	GO:0010721	negative regulation of cell development	10	2.92	GO:0048468, GO:0045596, GO:0060284	cell development, negative regulation of cell differentiation, regulation of cell development
6	GO:0048193	Golgi vesicle transport	5	2.92	GO:0016192, GO:0046907	vesicle-mediated transport, intracellular transport
8	GO:1901068	guanosine-containing compound metabolic process	12	2.9	GO:0046128	purine ribonucleoside metabolic process
8	GO:0046130	purine ribonucleoside catabolic process	12	2.9	GO:0042454, GO:0006152, GO:0046128	ribonucleoside catabolic process, purine nucleoside catabolic process, purine ribonucleoside metabolic process
4	GO:0007584	response to nutrient	8	2.9	GO:0042221, GO:0031667	response to chemical stimulus, response to nutrient levels
5	GO:0009894	regulation of catabolic process	13	2.88	GO:0019222, GO:0009056	regulation of metabolic process, catabolic process
5	GO:0003279	cardiac septum development	6	2.88	GO:0003205, GO:0048856	cardiac chamber development, anatomical structure development
8	GO:0018209	peptidyl-serine modification	6	2.88	GO:0018193	peptidyl-amino acid modification
9	GO:0006816	calcium ion transport	6	2.88	GO:0070838	divalent metal ion transport
7	GO:0042063	gliogenesis	7	2.86	GO:0022008	neurogenesis
5	GO:0007015	actin filament organization	4	2.85	GO:0030036	actin cytoskeleton organization
8	GO:0002758	innate immune response-activating signal transduction	3	2.85	GO:0002218, GO:0002757	activation of innate immune response, immune response-activating signal transduction
6	GO:0042391	regulation of membrane potential	9	2.84	GO:0006873	cellular ion homeostasis
7	GO:0048738	cardiac muscle tissue development	5	2.83	GO:0007507, GO:0014706	heart development, striated muscle tissue development
7	GO:0021545	cranial nerve development	7	2.83	GO:0021675	nerve development
9	GO:0006338	chromatin remodeling	4	2.82	GO:0016568	chromatin modification
9	GO:0043161	proteasomal ubiquitin-dependent protein catabolic process	4	2.8	GO:0010498, GO:0006511	proteasomal protein catabolic process, ubiquitin-dependent protein catabolic process
10	GO:0050772	positive regulation of axonogenesis	4	2.8	GO:0007409, GO:0050769, GO:0031346, GO:0050770	axonogenesis, positive regulation of neurogenesis, positive regulation of cell projection organization, regulation of axonogenesis
6	GO:0051592	response to calcium ion	4	2.8	GO:0010038	response to metal ion
6	GO:0017157	regulation of exocytosis	4	2.8	GO:0060627, GO:0051046, GO:0060341, GO:0006887	regulation of vesicle-mediated transport, regulation of secretion, regulation of cellular localization, exocytosis
8	GO:0042312	regulation of vasodilation	4	2.8	GO:0044057, GO:0042311	regulation of system process, vasodilation
6	GO:0048640	negative regulation of developmental growth	3	2.8	GO:0048638, GO:0045926, GO:0051093, GO:0048589	regulation of developmental growth, negative regulation of growth, negative regulation of developmental process, developmental growth
7	GO:0051028	mRNA transport	4	2.8	GO:0050658	RNA transport
6	GO:0006939	smooth muscle contraction	4	2.79	GO:0006936	muscle contraction
4	GO:0007565	female pregnancy	3	2.8	GO:0022414, GO:0051704	reproductive process, multi-organism process
6	GO:0046546	development of primary male sexual characteristics	6	2.81	GO:0046661, GO:0045137	male sex differentiation, development of primary sexual characteristics
7	GO:0090277	positive regulation of peptide hormone secretion	3	2.8	GO:0046887, GO:0002793, GO:0090276, GO:0030072	positive regulation of hormone secretion, positive regulation of peptide secretion, regulation of peptide hormone secretion, peptide hormone secretion
4	GO:0009991	response to extracellular stimulus	13	2.78	GO:0009605	response to external stimulus
6	GO:0050801	ion homeostasis	17	2.79	GO:0048878	chemical homeostasis
5	GO:0043434	response to peptide hormone stimulus	11	2.79	GO:0009725	response to hormone stimulus
6	GO:0061005	cell differentiation involved in kidney development	3	2.8	GO:0001822, GO:0030154	kidney development, cell differentiation
6	GO:0045765	regulation of angiogenesis	5	2.76	GO:0022603, GO:2000026, GO:0001525	regulation of anatomical structure morphogenesis, regulation of multicellular organismal development, angiogenesis
5	GO:0007281	germ cell development	5	2.76	GO:0007276, GO:0048468, GO:0003006, GO:0048610	gamete generation, cell development, developmental process involved in reproduction, cellular process involved in reproduction
6	GO:0043542	endothelial cell migration	6	2.77	GO:0016477	cell migration
7	GO:0001654	eye development	10	2.75	GO:0007423	sensory organ development
8	GO:0016358	dendrite development	7	2.76	GO:0048856, GO:0031175	anatomical structure development, neuron projection development
9	GO:0035195	gene silencing by miRNA	3	2.76	GO:0035194	posttranscriptional gene silencing by RNA
6	GO:0050954	sensory perception of mechanical stimulus	5	2.76	GO:0007600	sensory perception
6	GO:0035108	limb morphogenesis	4	2.76	GO:0035107, GO:0060173	appendage morphogenesis, limb development
6	GO:0003208	cardiac ventricle morphogenesis	4	2.76	GO:0003231, GO:0003206	cardiac ventricle development, cardiac chamber morphogenesis
7	GO:0051346	negative regulation of hydrolase activity	8	2.76	GO:0051336, GO:0043086	regulation of hydrolase activity, negative regulation of catalytic activity
8	GO:0003231	cardiac ventricle development	5	2.74	GO:0003205	cardiac chamber development
6	GO:0030003	cellular cation homeostasis	10	2.74	GO:0055080, GO:0006873	cation homeostasis, cellular ion homeostasis
8	GO:0055065	metal ion homeostasis	10	2.74	GO:0055080	cation homeostasis
4	GO:0044087	regulation of cellular component biogenesis	7	2.75	GO:0044085, GO:0050789	cellular component biogenesis, regulation of biological process
11	GO:0032147	activation of protein kinase activity	4	2.76	GO:0045860	positive regulation of protein kinase activity
11	GO:0050773	regulation of dendrite development	5	2.76	GO:0016358, GO:0010975	dendrite development, regulation of neuron projection development
6	GO:0035113	embryonic appendage morphogenesis	4	2.76	GO:0035107, GO:0048598	appendage morphogenesis, embryonic morphogenesis
5	GO:0002237	response to molecule of bacterial origin	5	2.74	GO:0010033, GO:0009617, GO:0009607	response to organic substance, response to bacterium, response to biotic stimulus
6	GO:0006633	fatty acid biosynthetic process	4	2.74	GO:0008610, GO:0006631, GO:0046394	lipid biosynthetic process, fatty acid metabolic process, carboxylic acid biosynthetic process
11	GO:0030819	positive regulation of cAMP biosynthetic process	3	2.72	GO:1900373, GO:0030816, GO:0030804, GO:0006171, GO:0030817	positive regulation of purine nucleotide biosynthetic process, positive regulation of cAMP metabolic process, positive regulation of cyclic nucleotide biosynthetic process, cAMP biosynthetic process, regulation of cAMP biosynthetic process
6	GO:0003205	cardiac chamber development	7	2.72	GO:0007507, GO:0048856	heart development, anatomical structure development
8	GO:0046128	purine ribonucleoside metabolic process	14	2.7	GO:0009119, GO:0042278	ribonucleoside metabolic process, purine nucleoside metabolic process
8	GO:0045936	negative regulation of phosphate metabolic process	8	2.66	GO:0006796, GO:0019220, GO:0010563	phosphate-containing compound metabolic process, regulation of phosphate metabolic process, negative regulation of phosphorus metabolic process
6	GO:0030900	forebrain development	9	2.63	GO:0007420, GO:0048856	brain development, anatomical structure development
5	GO:0051969	regulation of transmission of nerve impulse	9	2.64	GO:0031644, GO:0010646, GO:0019226, GO:0023051	regulation of neurological system process, regulation of cell communication, transmission of nerve impulse, regulation of signaling
6	GO:0048864	stem cell development	6	2.64	GO:0048863, GO:0048468	stem cell differentiation, cell development
4	GO:0009617	response to bacterium	6	2.64	GO:0051707	response to other organism
6	GO:0060562	epithelial tube morphogenesis	7	2.63	GO:0035239, GO:0002009	tube morphogenesis, morphogenesis of an epithelium
6	GO:0010837	regulation of keratinocyte proliferation	3	2.6	GO:0043616, GO:0042127	keratinocyte proliferation, regulation of cell proliferation
11	GO:0043507	positive regulation of JUN kinase activity	3	2.6	GO:0043506, GO:0043406	regulation of JUN kinase activity, positive regulation of MAP kinase activity
12	GO:0048814	regulation of dendrite morphogenesis	3	2.6	GO:0050773, GO:0048813, GO:0010769	regulation of dendrite development, dendrite morphogenesis, regulation of cell morphogenesis involved in differentiation
7	GO:0006413	translational initiation	3	2.6	GO:0006412, GO:0009987	translation, cellular process
7	GO:0051149	positive regulation of muscle cell differentiation	3	2.6	GO:0051147, GO:0045597, GO:0042692	regulation of muscle cell differentiation, positive regulation of cell differentiation, muscle cell differentiation
8	GO:0031623	receptor internalization	3	2.6	GO:0006898, GO:0043112	receptor-mediated endocytosis, receptor metabolic process
6	GO:0040023	establishment of nucleus localization	3	2.6	GO:0051647, GO:0051649, GO:0051656	nucleus localization, establishment of localization in cell, establishment of organelle localization
8	GO:0048010	vascular endothelial growth factor receptor signaling pathway	3	2.6	GO:0007169	transmembrane receptor protein tyrosine kinase signaling pathway
8	GO:0018108	peptidyl-tyrosine phosphorylation	5	2.6	GO:0006468, GO:0018212	protein phosphorylation, peptidyl-tyrosine modification
6	GO:0007229	integrin-mediated signaling pathway	3	2.6	GO:0007166	cell surface receptor signaling pathway
7	GO:0043588	skin development	3	2.6	GO:0008544	epidermis development
7	GO:0045807	positive regulation of endocytosis	3	2.6	GO:0051050, GO:0048522, GO:0006897, GO:0030100, GO:0051130	positive regulation of transport, positive regulation of cellular process, endocytosis, regulation of endocytosis, positive regulation of cellular component organization
11	GO:0010977	negative regulation of neuron projection development	3	2.6	GO:0031175, GO:0010975, GO:0031345	neuron projection development, regulation of neuron projection development, negative regulation of cell projection organization
7	GO:0051603	proteolysis involved in cellular protein catabolic process	10	2.6	GO:0006508, GO:0044257	proteolysis, cellular protein catabolic process
9	GO:0030514	negative regulation of BMP signaling pathway	3	2.6	GO:0090101, GO:0030510, GO:0030509	negative regulation of transmembrane receptor protein serine/threonine kinase signaling pathway, regulation of BMP signaling pathway, BMP signaling pathway
9	GO:0048169	regulation of long-term neuronal synaptic plasticity	3	2.6	GO:0048168	regulation of neuronal synaptic plasticity
7	GO:0071222	cellular response to lipopolysaccharide	3	2.6	GO:0071219, GO:0032496	cellular response to molecule of bacterial origin, response to lipopolysaccharide
9	GO:0032925	regulation of activin receptor signaling pathway	3	2.6	GO:0032924, GO:0090092	activin receptor signaling pathway, regulation of transmembrane receptor protein serine/threonine kinase signaling pathway
7	GO:0050680	negative regulation of epithelial cell proliferation	3	2.6	GO:0008285, GO:0050673, GO:0050678	negative regulation of cell proliferation, epithelial cell proliferation, regulation of epithelial cell proliferation
6	GO:0043627	response to estrogen stimulus	3	2.6	GO:0048545	response to steroid hormone stimulus
2	GO:0016032	viral reproduction	4	2.58	GO:0008150	biological_process
5	GO:0051270	regulation of cellular component movement	10	2.58	GO:0032879, GO:0006928, GO:0050794	regulation of localization, cellular component movement, regulation of cellular process
5	GO:0048863	stem cell differentiation	7	2.58	GO:0030154	cell differentiation
7	GO:0006898	receptor-mediated endocytosis	4	2.56	GO:0006897	endocytosis
5	GO:0007160	cell-matrix adhesion	4	2.56	GO:0031589	cell-substrate adhesion
4	GO:0006644	phospholipid metabolic process	5	2.56	GO:0019637, GO:0044255	organophosphate metabolic process, cellular lipid metabolic process
5	GO:0030155	regulation of cell adhesion	4	2.57	GO:0007155, GO:0050794	cell adhesion, regulation of cellular process
7	GO:0006414	translational elongation	3	2.56	GO:0006412, GO:0034645	translation, cellular macromolecule biosynthetic process
5	GO:0055123	digestive system development	6	2.57	GO:0048731	system development
8	GO:0010594	regulation of endothelial cell migration	5	2.54	GO:0030334, GO:0043542	regulation of cell migration, endothelial cell migration
6	GO:0043269	regulation of ion transport	9	2.54	GO:0006811, GO:0051049	ion transport, regulation of transport
5	GO:0048638	regulation of developmental growth	4	2.53	GO:0048589, GO:0050793, GO:0040008	developmental growth, regulation of developmental process, regulation of growth
9	GO:0051924	regulation of calcium ion transport	5	2.54	GO:0006816, GO:0010959	calcium ion transport, regulation of metal ion transport
6	GO:0030100	regulation of endocytosis	5	2.52	GO:0060627, GO:0051128, GO:0006897	regulation of vesicle-mediated transport, regulation of cellular component organization, endocytosis
8	GO:0051783	regulation of nuclear division	5	2.52	GO:0000280, GO:0033043	nuclear division, regulation of organelle organization
8	GO:0045814	negative regulation of gene expression, epigenetic	3	2.52	GO:0040029, GO:0010629	regulation of gene expression, epigenetic, negative regulation of gene expression
8	GO:0006606	protein import into nucleus	6	2.5	GO:0006605, GO:0034504, GO:0051170, GO:0017038	protein targeting, protein localization to nucleus, nuclear import, protein import
6	GO:0034622	cellular macromolecular complex assembly	9	2.5	GO:0065003, GO:0034621, GO:0071844	macromolecular complex assembly, cellular macromolecular complex subunit organization, cellular component assembly at cellular level
7	GO:0051056	regulation of small GTPase mediated signal transduction	5	2.5	GO:0007264, GO:0009966	small GTPase mediated signal transduction, regulation of signal transduction
8	GO:0046578	regulation of Ras protein signal transduction	4	2.5	GO:0007265, GO:0051056	Ras protein signal transduction, regulation of small GTPase mediated signal transduction
3	GO:0045321	leukocyte activation	10	2.48	GO:0002376, GO:0001775	immune system process, cell activation
5	GO:0072521	purine-containing compound metabolic process	22	2.47	GO:0046483, GO:0034641	heterocycle metabolic process, cellular nitrogen compound metabolic process
7	GO:0017038	protein import	8	2.46	GO:0015031	protein transport
6	GO:0042110	T cell activation	6	2.47	GO:0046649	lymphocyte activation
5	GO:0030163	protein catabolic process	11	2.45	GO:0019538, GO:0009057	protein metabolic process, macromolecule catabolic process
6	GO:0019752	carboxylic acid metabolic process	13	2.46	GO:0043436	oxoacid metabolic process
5	GO:0009914	hormone transport	10	2.44	GO:0010817, GO:0006810	regulation of hormone levels, transport
5	GO:0040013	negative regulation of locomotion	8	2.45	GO:0048519, GO:0040012, GO:0040011	negative regulation of biological process, regulation of locomotion, locomotion
6	GO:0046394	carboxylic acid biosynthetic process	6	2.43	GO:0016053, GO:0019752	organic acid biosynthetic process, carboxylic acid metabolic process
4	GO:0045087	innate immune response	6	2.43	GO:0006955, GO:0006952	immune response, defense response
6	GO:0007005	mitochondrion organization	4	2.42	GO:0006996	organelle organization
6	GO:0042113	B cell activation	4	2.42	GO:0046649	lymphocyte activation
9	GO:0014066	regulation of phosphatidylinositol 3-kinase cascade	4	2.4	GO:0014065, GO:0009966	phosphatidylinositol 3-kinase cascade, regulation of signal transduction
6	GO:0072523	purine-containing compound catabolic process	17	2.39	GO:0046700, GO:0044270, GO:0072521	heterocycle catabolic process, cellular nitrogen compound catabolic process, purine-containing compound metabolic process
4	GO:0044248	cellular catabolic process	30	2.39	GO:0044237, GO:0009056	cellular metabolic process, catabolic process
9	GO:0048255	mRNA stabilization	4	2.4	GO:0043488, GO:0043489	regulation of mRNA stability, RNA stabilization
6	GO:0009166	nucleotide catabolic process	17	2.39	GO:0034655, GO:0009117	nucleobase-containing compound catabolic process, nucleotide metabolic process
7	GO:0090218	positive regulation of lipid kinase activity	4	2.4	GO:0045834, GO:0033674, GO:0043550	positive regulation of lipid metabolic process, positive regulation of kinase activity, regulation of lipid kinase activity
8	GO:0014065	phosphatidylinositol 3-kinase cascade	4	2.4	GO:0048015	phosphatidylinositol-mediated signaling
6	GO:0003151	outflow tract morphogenesis	4	2.4	GO:0003007, GO:0009653	heart morphogenesis, anatomical structure morphogenesis
4	GO:0001935	endothelial cell proliferation	4	2.4	GO:0050673	epithelial cell proliferation
7	GO:0001936	regulation of endothelial cell proliferation	4	2.4	GO:0001935, GO:0050678	endothelial cell proliferation, regulation of epithelial cell proliferation
4	GO:2000241	regulation of reproductive process	4	2.4	GO:0050789, GO:0022414	regulation of biological process, reproductive process
7	GO:0051054	positive regulation of DNA metabolic process	3	2.4	GO:0045935, GO:0010604, GO:0006259, GO:0051052	positive regulation of nucleobase-containing compound metabolic process, positive regulation of macromolecule metabolic process, DNA metabolic process, regulation of DNA metabolic process
7	GO:0048515	spermatid differentiation	4	2.4	GO:0003006, GO:0048610, GO:0030154, GO:0007283	developmental process involved in reproduction, cellular process involved in reproduction, cell differentiation, spermatogenesis
5	GO:0009261	ribonucleotide catabolic process	15	2.39	GO:1901136, GO:0009259, GO:0009166	carbohydrate derivative catabolic process, ribonucleotide metabolic process, nucleotide catabolic process
7	GO:0009143	nucleoside triphosphate catabolic process	15	2.39	GO:0009141, GO:0009166	nucleoside triphosphate metabolic process, nucleotide catabolic process
6	GO:0009117	nucleotide metabolic process	22	2.39	GO:0006753	nucleoside phosphate metabolic process
5	GO:0046883	regulation of hormone secretion	7	2.38	GO:0051046, GO:0060341, GO:0010646, GO:0046879, GO:0023051	regulation of secretion, regulation of cellular localization, regulation of cell communication, hormone secretion, regulation of signaling
10	GO:0042787	protein ubiquitination involved in ubiquitin-dependent protein catabolic process	3	2.36	GO:0006511, GO:0016567	ubiquitin-dependent protein catabolic process, protein ubiquitination
4	GO:0050808	synapse organization	5	2.37	GO:0016043	cellular component organization
8	GO:0030225	macrophage differentiation	3	2.36	GO:0002573	myeloid leukocyte differentiation
5	GO:0001657	ureteric bud development	3	2.36	GO:0035295	tube development
7	GO:0000086	G2/M transition of mitotic cell cycle	3	2.36	GO:0022402, GO:0051329	cell cycle process, interphase of mitotic cell cycle
8	GO:0030183	B cell differentiation	3	2.36	GO:0030098, GO:0042113	lymphocyte differentiation, B cell activation
8	GO:0006814	sodium ion transport	3	2.36	GO:0030001, GO:0015672	metal ion transport, monovalent inorganic cation transport
6	GO:0050900	leukocyte migration	3	2.36	GO:0016477, GO:0002376	cell migration, immune system process
3	GO:0007623	circadian rhythm	3	2.36	GO:0048511	rhythmic process
6	GO:0051781	positive regulation of cell division	3	2.36	GO:0051301, GO:0048522, GO:0051302	cell division, positive regulation of cellular process, regulation of cell division
6	GO:0000279	M phase	9	2.35	GO:0022403	cell cycle phase
3	GO:0030029	actin filament-based process	7	2.35	GO:0009987	cellular process
7	GO:0051493	regulation of cytoskeleton organization	5	2.34	GO:0007010, GO:0033043	cytoskeleton organization, regulation of organelle organization
3	GO:0007568	aging	3	2.35	GO:0032502	developmental process
7	GO:0008366	axon ensheathment	4	2.32	GO:0007272	ensheathment of neurons
6	GO:0009913	epidermal cell differentiation	3	2.32	GO:0030154, GO:0008544	cell differentiation, epidermis development
5	GO:0044344	cellular response to fibroblast growth factor stimulus	4	2.32	GO:0071495, GO:0071774, GO:0071363	cellular response to endogenous stimulus, response to fibroblast growth factor stimulus, cellular response to growth factor stimulus
5	GO:0046620	regulation of organ growth	4	2.33	GO:0035265, GO:0040008	organ growth, regulation of growth
7	GO:0060538	skeletal muscle organ development	5	2.31	GO:0007517	muscle organ development
4	GO:0006091	generation of precursor metabolites and energy	6	2.31	GO:0044237	cellular metabolic process
7	GO:0010720	positive regulation of cell development	8	2.3	GO:0048468, GO:0045597, GO:0060284	cell development, positive regulation of cell differentiation, regulation of cell development
7	GO:0010562	positive regulation of phosphorus metabolic process	19	2.29	GO:0006793, GO:0051174, GO:0031325	phosphorus metabolic process, regulation of phosphorus metabolic process, positive regulation of cellular metabolic process
6	GO:0060415	muscle tissue morphogenesis	5	2.3	GO:0048644, GO:0048729	muscle organ morphogenesis, tissue morphogenesis
6	GO:0050658	RNA transport	5	2.28	GO:0050657, GO:0051236	nucleic acid transport, establishment of RNA localization
8	GO:0010498	proteasomal protein catabolic process	5	2.28	GO:0051603	proteolysis involved in cellular protein catabolic process
6	GO:0055088	lipid homeostasis	2	2.28	GO:0048878	chemical homeostasis
7	GO:0042311	vasodilation	4	2.28	GO:0050880	regulation of blood vessel size
6	GO:0033189	response to vitamin A	5	2.28	GO:0033273	response to vitamin
7	GO:0030301	cholesterol transport	3	2.28	GO:0015918	sterol transport
4	GO:0060560	developmental growth involved in morphogenesis	4	2.28	GO:0009653, GO:0048589	anatomical structure morphogenesis, developmental growth
10	GO:0031396	regulation of protein ubiquitination	4	2.28	GO:0016567, GO:0031399	protein ubiquitination, regulation of protein modification process
5	GO:0001763	morphogenesis of a branching structure	5	2.28	GO:0032501, GO:0009653	multicellular organismal process, anatomical structure morphogenesis
6	GO:0051147	regulation of muscle cell differentiation	5	2.28	GO:0045595, GO:0042692	regulation of cell differentiation, muscle cell differentiation
6	GO:0071383	cellular response to steroid hormone stimulus	5	2.28	GO:0048545, GO:0032870	response to steroid hormone stimulus, cellular response to hormone stimulus
5	GO:0021515	cell differentiation in spinal cord	3	2.27	GO:0021510, GO:0030154	spinal cord development, cell differentiation
8	GO:0035194	posttranscriptional gene silencing by RNA	4	2.26	GO:0031047, GO:0016441	gene silencing by RNA, posttranscriptional gene silencing
5	GO:0008202	steroid metabolic process	7	2.24	GO:0006629	lipid metabolic process
6	GO:0006305	DNA alkylation	2	2.24	GO:0006304	DNA modification
7	GO:0010959	regulation of metal ion transport	7	2.24	GO:0043269, GO:0030001	regulation of ion transport, metal ion transport
5	GO:0032101	regulation of response to external stimulus	8	2.25	GO:0009605, GO:0048583	response to external stimulus, regulation of response to stimulus
9	GO:0032872	regulation of stress-activated MAPK cascade	7	2.24	GO:0070302, GO:0043408, GO:0051403	regulation of stress-activated protein kinase signaling cascade, regulation of MAPK cascade, stress-activated MAPK cascade
4	GO:0043414	macromolecule methylation	2	2.24	GO:0043412, GO:0044260, GO:0032259	macromolecule modification, cellular macromolecule metabolic process, methylation
6	GO:0010565	regulation of cellular ketone metabolic process	5	2.24	GO:0042180, GO:0031323	cellular ketone metabolic process, regulation of cellular metabolic process
7	GO:0048596	embryonic camera-type eye morphogenesis	3	2.22	GO:0048593, GO:0048048, GO:0031076	camera-type eye morphogenesis, embryonic eye morphogenesis, embryonic camera-type eye development
7	GO:0031098	stress-activated protein kinase signaling cascade	10	2.21	GO:0033554, GO:0007243	cellular response to stress, intracellular protein kinase cascade
5	GO:0034621	cellular macromolecular complex subunit organization	10	2.22	GO:0043933, GO:0071842	macromolecular complex subunit organization, cellular component organization at cellular level
7	GO:0006913	nucleocytoplasmic transport	9	2.22	GO:0051169	nuclear transport
5	GO:0001678	cellular glucose homeostasis	3	2.22	GO:0042593, GO:0055082	glucose homeostasis, cellular chemical homeostasis
4	GO:0042594	response to starvation	5	2.22	GO:0006950, GO:0031667	response to stress, response to nutrient levels
10	GO:0043280	positive regulation of cysteine-type endopeptidase activity involved in apoptotic process	3	2.2	GO:0006915, GO:0043281, GO:2001056	apoptotic process, regulation of cysteine-type endopeptidase activity involved in apoptotic process, positive regulation of cysteine-type endopeptidase activity
7	GO:0071156	regulation of cell cycle arrest	3	2.2	GO:0007050, GO:0010564	cell cycle arrest, regulation of cell cycle process
8	GO:0045727	positive regulation of translation	2	2.2	GO:0032270, GO:0006412, GO:0006417, GO:0031328, GO:0010557	positive regulation of cellular protein metabolic process, translation, regulation of translation, positive regulation of cellular biosynthetic process, positive regulation of macromolecule biosynthetic process
9	GO:0021955	central nervous system neuron axonogenesis	3	2.2	GO:0007409, GO:0021954	axonogenesis, central nervous system neuron development
5	GO:0090102	cochlea development	3	2.2	GO:0048839, GO:0048856	inner ear development, anatomical structure development
5	GO:0048730	epidermis morphogenesis	3	2.2	GO:0009887, GO:0048729, GO:0008544	organ morphogenesis, tissue morphogenesis, epidermis development
5	GO:0048546	digestive tract morphogenesis	2	2.2	GO:0048565, GO:0009653	digestive tract development, anatomical structure morphogenesis
6	GO:0008217	regulation of blood pressure	4	2.21	GO:0008015, GO:0065008	blood circulation, regulation of biological quality
7	GO:0030216	keratinocyte differentiation	2	2.2	GO:0030855, GO:0009913	epithelial cell differentiation, epidermal cell differentiation
8	GO:0030833	regulation of actin filament polymerization	2	2.2	GO:0008064, GO:0030041, GO:0032271	regulation of actin polymerization or depolymerization, actin filament polymerization, regulation of protein polymerization
8	GO:0008543	fibroblast growth factor receptor signaling pathway	3	2.2	GO:0007169, GO:0044344	transmembrane receptor protein tyrosine kinase signaling pathway, cellular response to fibroblast growth factor stimulus
4	GO:0008344	adult locomotory behavior	3	2.2	GO:0030534, GO:0007626	adult behavior, locomotory behavior
6	GO:0030307	positive regulation of cell growth	3	2.2	GO:0048522, GO:0045927, GO:0001558, GO:0016049	positive regulation of cellular process, positive regulation of growth, regulation of cell growth, cell growth
7	GO:0050806	positive regulation of synaptic transmission	3	2.2	GO:0050804, GO:0051971, GO:0007268	regulation of synaptic transmission, positive regulation of transmission of nerve impulse, synaptic transmission
9	GO:0016579	protein deubiquitination	3	2.2	GO:0070646	protein modification by small protein removal
5	GO:0050919	negative chemotaxis	2	2.2	GO:0006935	chemotaxis
7	GO:0006470	protein dephosphorylation	3	2.2	GO:0016311, GO:0006464	dephosphorylation, cellular protein modification process
7	GO:0045732	positive regulation of protein catabolic process	3	2.2	GO:0042176, GO:0051247, GO:0030163, GO:0009896	regulation of protein catabolic process, positive regulation of protein metabolic process, protein catabolic process, positive regulation of catabolic process
8	GO:0010595	positive regulation of endothelial cell migration	3	2.2	GO:0043542, GO:0010594, GO:0030335	endothelial cell migration, regulation of endothelial cell migration, positive regulation of cell migration
6	GO:0009411	response to UV	2	2.2	GO:0009416	response to light stimulus
8	GO:0042552	myelination	3	2.2	GO:0008366	axon ensheathment
6	GO:0007589	body fluid secretion	3	2.2	GO:0046903, GO:0050878	secretion, regulation of body fluid levels
8	GO:0055007	cardiac muscle cell differentiation	2	2.2	GO:0048738, GO:0051146, GO:0035051	cardiac muscle tissue development, striated muscle cell differentiation, cardiac cell differentiation
3	GO:0007017	microtubule-based process	7	2.18	GO:0009987	cellular process
9	GO:0055074	calcium ion homeostasis	6	2.17	GO:0055065, GO:0072507	metal ion homeostasis, divalent inorganic cation homeostasis
7	GO:0007519	skeletal muscle tissue development	4	2.18	GO:0014706, GO:0060538	striated muscle tissue development, skeletal muscle organ development
7	GO:0072503	cellular divalent inorganic cation homeostasis	6	2.17	GO:0030003, GO:0072507	cellular cation homeostasis, divalent inorganic cation homeostasis
6	GO:0072239	metanephric glomerulus vasculature development	2	2.18	GO:0072012, GO:0072224	glomerulus vasculature development, metanephric glomerulus development
5	GO:0001505	regulation of neurotransmitter levels	5	2.18	GO:0065008, GO:0007268	regulation of biological quality, synaptic transmission
8	GO:0003229	ventricular cardiac muscle tissue development	4	2.16	GO:0048738	cardiac muscle tissue development
5	GO:0048489	synaptic vesicle transport	4	2.16	GO:0016192, GO:0007268	vesicle-mediated transport, synaptic transmission
9	GO:0030510	regulation of BMP signaling pathway	4	2.16	GO:0090092, GO:0030509	regulation of transmembrane receptor protein serine/threonine kinase signaling pathway, BMP signaling pathway
5	GO:0042698	ovulation cycle	5	2.16	GO:0048609, GO:0048511	multicellular organismal reproductive process, rhythmic process
8	GO:0032318	regulation of Ras GTPase activity	3	2.16	GO:0046578, GO:0043087	regulation of Ras protein signal transduction, regulation of GTPase activity
4	GO:0070482	response to oxygen levels	8	2.16	GO:0042221	response to chemical stimulus
5	GO:0051402	neuron apoptotic process	6	2.16	GO:0097285, GO:0070997	cell-type specific apoptotic process, neuron death
5	GO:0060872	semicircular canal development	3	2.16	GO:0048839, GO:0048856	inner ear development, anatomical structure development
6	GO:0001667	ameboidal cell migration	4	2.16	GO:0016477	cell migration
6	GO:0055008	cardiac muscle tissue morphogenesis	4	2.16	GO:0048738, GO:0003007, GO:0060415	cardiac muscle tissue development, heart morphogenesis, muscle tissue morphogenesis
6	GO:0045787	positive regulation of cell cycle	3	2.16	GO:0051726, GO:0048522, GO:0007049	regulation of cell cycle, positive regulation of cellular process, cell cycle
7	GO:0019218	regulation of steroid metabolic process	4	2.16	GO:0019216, GO:0008202	regulation of lipid metabolic process, steroid metabolic process
6	GO:0019318	hexose metabolic process	6	2.16	GO:0005996	monosaccharide metabolic process
5	GO:0051656	establishment of organelle localization	3	2.16	GO:0051234, GO:0051640	establishment of localization, organelle localization
7	GO:0019217	regulation of fatty acid metabolic process	5	2.14	GO:0019216, GO:0010565, GO:0006631	regulation of lipid metabolic process, regulation of cellular ketone metabolic process, fatty acid metabolic process
7	GO:0051052	regulation of DNA metabolic process	6	2.15	GO:0006259, GO:0019219, GO:0060255	DNA metabolic process, regulation of nucleobase-containing compound metabolic process, regulation of macromolecule metabolic process
8	GO:0012502	induction of programmed cell death	6	2.12	GO:0043068	positive regulation of programmed cell death
6	GO:0016311	dephosphorylation	5	2.11	GO:0006796	phosphate-containing compound metabolic process
4	GO:0006520	cellular amino acid metabolic process	5	2.12	GO:0044238, GO:0019752	primary metabolic process, carboxylic acid metabolic process
4	GO:0010876	lipid localization	5	2.1	GO:0033036	macromolecule localization
3	GO:0009607	response to biotic stimulus	9	2.11	GO:0050896	response to stimulus
7	GO:0034504	protein localization to nucleus	7	2.1	GO:0033365	protein localization to organelle
5	GO:0021537	telencephalon development	6	2.09	GO:0030900, GO:0048856	forebrain development, anatomical structure development
6	GO:0051271	negative regulation of cellular component movement	7	2.09	GO:0048523, GO:0051270, GO:0006928	negative regulation of cellular process, regulation of cellular component movement, cellular component movement
8	GO:0006469	negative regulation of protein kinase activity	4	2.08	GO:0033673, GO:0045859, GO:0001933	negative regulation of kinase activity, regulation of protein kinase activity, negative regulation of protein phosphorylation
6	GO:0031960	response to corticosteroid stimulus	4	2.08	GO:0048545	response to steroid hormone stimulus
5	GO:0008361	regulation of cell size	3	2.08	GO:0032535	regulation of cellular component size
7	GO:0031333	negative regulation of protein complex assembly	4	2.08	GO:0006461, GO:0043254, GO:0051129	protein complex assembly, regulation of protein complex assembly, negative regulation of cellular component organization
8	GO:0061136	regulation of proteasomal protein catabolic process	4	2.08	GO:0042176, GO:0032268, GO:0010498, GO:0031329, GO:0030162	regulation of protein catabolic process, regulation of cellular protein metabolic process, proteasomal protein catabolic process, regulation of cellular catabolic process, regulation of proteolysis
4	GO:0001101	response to acid	4	2.08	GO:0042221	response to chemical stimulus
7	GO:2000147	positive regulation of cell motility	4	2.09	GO:2000145, GO:0051272, GO:0048870, GO:0040017	regulation of cell motility, positive regulation of cellular component movement, cell motility, positive regulation of locomotion
8	GO:0010906	regulation of glucose metabolic process	3	2.08	GO:0010675, GO:0006006	regulation of cellular carbohydrate metabolic process, glucose metabolic process
5	GO:0021517	ventral spinal cord development	3	2.07	GO:0021510, GO:0048856	spinal cord development, anatomical structure development
4	GO:0061024	membrane organization	5	2.04	GO:0016043	cellular component organization
6	GO:0046887	positive regulation of hormone secretion	4	2.04	GO:0051047, GO:0048522, GO:0046879, GO:0046883	positive regulation of secretion, positive regulation of cellular process, hormone secretion, regulation of hormone secretion
7	GO:0043550	regulation of lipid kinase activity	5	2.04	GO:0019216, GO:0043549	regulation of lipid metabolic process, regulation of kinase activity
3	GO:0019637	organophosphate metabolic process	5	2.03	GO:0008152	metabolic process
5	GO:0009267	cellular response to starvation	4	2.03	GO:0033554, GO:0031669, GO:0042594	cellular response to stress, cellular response to nutrient levels, response to starvation
5	GO:0001817	regulation of cytokine production	6	2.02	GO:0001816, GO:0051239	cytokine production, regulation of multicellular organismal process
8	GO:0006275	regulation of DNA replication	4	2.02	GO:2000112, GO:0006260, GO:0051052	regulation of cellular macromolecule biosynthetic process, DNA replication, regulation of DNA metabolic process
7	GO:0043534	blood vessel endothelial cell migration	4	2.02	GO:0043542	endothelial cell migration
6	GO:0071418	cellular response to amine stimulus	4	2.02	GO:0014075, GO:0071417	response to amine stimulus, cellular response to organic nitrogen
5	GO:0060537	muscle tissue development	10	2.02	GO:0009888	tissue development
11	GO:0034130	toll-like receptor 1 signaling pathway	2	2	GO:0002224	toll-like receptor signaling pathway
6	GO:0006921	cellular component disassembly involved in apoptotic process	2	2	GO:0071845, GO:0006915	cellular component disassembly at cellular level, apoptotic process
8	GO:0042632	cholesterol homeostasis	2	2	GO:0055092	sterol homeostasis
7	GO:0071356	cellular response to tumor necrosis factor	2	2	GO:0034612, GO:0071345	response to tumor necrosis factor, cellular response to cytokine stimulus
8	GO:0006198	cAMP catabolic process	2	2	GO:0006195, GO:0046058, GO:0009214	purine nucleotide catabolic process, cAMP metabolic process, cyclic nucleotide catabolic process
6	GO:0060017	parathyroid gland development	2	2	GO:0048732, GO:0035270	gland development, endocrine system development
8	GO:0006879	cellular iron ion homeostasis	2	2	GO:0055072, GO:0006875	iron ion homeostasis, cellular metal ion homeostasis
8	GO:0014911	positive regulation of smooth muscle cell migration	2	2	GO:0030335, GO:0014910, GO:0014909	positive regulation of cell migration, regulation of smooth muscle cell migration, smooth muscle cell migration
8	GO:0031648	protein destabilization	2	2	GO:0031647	regulation of protein stability
7	GO:0071277	cellular response to calcium ion	2	2	GO:0051592, GO:0071248	response to calcium ion, cellular response to metal ion
6	GO:0033500	carbohydrate homeostasis	5	2	GO:0048878	chemical homeostasis
7	GO:0033572	transferrin transport	2	2	GO:0015031, GO:0015682	protein transport, ferric iron transport
11	GO:0030517	negative regulation of axon extension	2	2	GO:0030516, GO:0030308, GO:0048675, GO:0048640, GO:0050771	regulation of axon extension, negative regulation of cell growth, axon extension, negative regulation of developmental growth, negative regulation of axonogenesis
4	GO:0003360	brainstem development	2	2	GO:0048856	anatomical structure development
7	GO:0045669	positive regulation of osteoblast differentiation	2	2	GO:0045597, GO:0001649, GO:0045667	positive regulation of cell differentiation, osteoblast differentiation, regulation of osteoblast differentiation
6	GO:0090103	cochlea morphogenesis	2	2	GO:0042472, GO:0090102, GO:0048598	inner ear morphogenesis, cochlea development, embryonic morphogenesis
11	GO:0070936	protein K48-linked ubiquitination	2	2	GO:0000209	protein polyubiquitination
10	GO:0033138	positive regulation of peptidyl-serine phosphorylation	2	2	GO:0001934, GO:0018105, GO:0033135	positive regulation of protein phosphorylation, peptidyl-serine phosphorylation, regulation of peptidyl-serine phosphorylation
12	GO:0042517	positive regulation of tyrosine phosphorylation of Stat3 protein	2	2	GO:0042516, GO:0042503, GO:0042531	regulation of tyrosine phosphorylation of Stat3 protein, tyrosine phosphorylation of Stat3 protein, positive regulation of tyrosine phosphorylation of STAT protein
7	GO:0016239	positive regulation of macroautophagy	2	2	GO:0032109, GO:0016241, GO:0016236, GO:0010647, GO:0010508	positive regulation of response to nutrient levels, regulation of macroautophagy, macroautophagy, positive regulation of cell communication, positive regulation of autophagy
5	GO:0014059	regulation of dopamine secretion	2	2	GO:0050433, GO:0010646, GO:0014046, GO:0023051	regulation of catecholamine secretion, regulation of cell communication, dopamine secretion, regulation of signaling
6	GO:0001889	liver development	2	2	GO:0061008, GO:0048513	hepaticobiliary system development, organ development
6	GO:0043401	steroid hormone mediated signaling pathway	2	2	GO:0071383, GO:0009755	cellular response to steroid hormone stimulus, hormone-mediated signaling pathway
8	GO:0001892	embryonic placenta development	2	2	GO:0001701, GO:0048568, GO:0001890	in utero embryonic development, embryonic organ development, placenta development
8	GO:0050821	protein stabilization	2	2	GO:0031647	regulation of protein stability
10	GO:0031954	positive regulation of protein autophosphorylation	2	2	GO:0001934, GO:0031952, GO:0046777	positive regulation of protein phosphorylation, regulation of protein autophosphorylation, protein autophosphorylation
7	GO:0042474	middle ear morphogenesis	2	2	GO:0042471, GO:0048598	ear morphogenesis, embryonic morphogenesis
7	GO:0042473	outer ear morphogenesis	2	2	GO:0042471, GO:0048598	ear morphogenesis, embryonic morphogenesis
12	GO:0000381	regulation of alternative nuclear mRNA splicing, via spliceosome	2	2	GO:0048024, GO:0000380	regulation of nuclear mRNA splicing, via spliceosome, alternative nuclear mRNA splicing, via spliceosome
6	GO:0042759	long-chain fatty acid biosynthetic process	2	2	GO:0001676, GO:0006633	long-chain fatty acid metabolic process, fatty acid biosynthetic process
4	GO:0030010	establishment of cell polarity	2	2	GO:0007163	establishment or maintenance of cell polarity
9	GO:0046627	negative regulation of insulin receptor signaling pathway	2	2	GO:1900077, GO:0008286, GO:0009968, GO:0046626	negative regulation of cellular response to insulin stimulus, insulin receptor signaling pathway, negative regulation of signal transduction, regulation of insulin receptor signaling pathway
7	GO:0043206	fibril organization	2	2	GO:0030198	extracellular matrix organization
5	GO:0071773	cellular response to BMP stimulus	2	2	GO:0071495, GO:0071772, GO:0071363	cellular response to endogenous stimulus, response to BMP stimulus, cellular response to growth factor stimulus
11	GO:0070423	nucleotide-binding oligomerization domain containing signaling pathway	2	2	GO:0002753, GO:0035872	cytoplasmic pattern recognition receptor signaling pathway, nucleotide-binding domain, leucine rich repeat containing receptor signaling pathway
8	GO:0010719	negative regulation of epithelial to mesenchymal transition	2	2	GO:0010717, GO:0001837, GO:0010771	regulation of epithelial to mesenchymal transition, epithelial to mesenchymal transition, negative regulation of cell morphogenesis involved in differentiation
9	GO:0061028	establishment of endothelial barrier	2	2	GO:0001885	endothelial cell development
5	GO:0001662	behavioral fear response	2	2	GO:0002209, GO:0042596	behavioral defense response, fear response
10	GO:0043407	negative regulation of MAP kinase activity	2	2	GO:0071901, GO:0043405	negative regulation of protein serine/threonine kinase activity, regulation of MAP kinase activity
10	GO:0031290	retinal ganglion cell axon guidance	2	2	GO:0007411	axon guidance
8	GO:0090280	positive regulation of calcium ion import	2	2	GO:0051928, GO:0070509, GO:0034767, GO:0090279	positive regulation of calcium ion transport, calcium ion import, positive regulation of ion transmembrane transport, regulation of calcium ion import
8	GO:0000731	DNA synthesis involved in DNA repair	2	2	GO:0071897, GO:0006281	DNA biosynthetic process, DNA repair
7	GO:0007601	visual perception	2	2	GO:0050953	sensory perception of light stimulus
8	GO:0045909	positive regulation of vasodilation	2	2	GO:0042312, GO:0051240, GO:0042311	regulation of vasodilation, positive regulation of multicellular organismal process, vasodilation
9	GO:0010642	negative regulation of platelet-derived growth factor receptor signaling pathway	2	2	GO:0010640, GO:0048008, GO:0009968	regulation of platelet-derived growth factor receptor signaling pathway, platelet-derived growth factor receptor signaling pathway, negative regulation of signal transduction
8	GO:0071385	cellular response to glucocorticoid stimulus	2	2	GO:0071384, GO:0051384	cellular response to corticosteroid stimulus, response to glucocorticoid stimulus
11	GO:0034142	toll-like receptor 4 signaling pathway	2	2	GO:0002224	toll-like receptor signaling pathway
6	GO:0001502	cartilage condensation	2	2	GO:0051216, GO:0016337, GO:0048705	cartilage development, cell-cell adhesion, skeletal system morphogenesis
8	GO:0010923	negative regulation of phosphatase activity	2	2	GO:0010921, GO:0051346	regulation of phosphatase activity, negative regulation of hydrolase activity
7	GO:0090307	spindle assembly involved in mitosis	2	2	GO:0007067, GO:0051225, GO:0007052	mitosis, spindle assembly, mitotic spindle organization
7	GO:0048488	synaptic vesicle endocytosis	2	2	GO:0006897, GO:0048489	endocytosis, synaptic vesicle transport
12	GO:0035666	TRIF-dependent toll-like receptor signaling pathway	2	2	GO:0002756	MyD88-independent toll-like receptor signaling pathway
4	GO:0001967	suckling behavior	2	2	GO:0007631, GO:0051705	feeding behavior, behavioral interaction between organisms
6	GO:0008063	Toll signaling pathway	2	2	GO:0007166	cell surface receptor signaling pathway
6	GO:0007628	adult walking behavior	2	2	GO:0008344	adult locomotory behavior
9	GO:0010875	positive regulation of cholesterol efflux	2	2	GO:0033344, GO:0010874, GO:0032376	cholesterol efflux, regulation of cholesterol efflux, positive regulation of cholesterol transport
7	GO:0048538	thymus development	2	2	GO:0048534	hemopoietic or lymphoid organ development
9	GO:0070374	positive regulation of ERK1 and ERK2 cascade	2	2	GO:0070371, GO:0043410, GO:0070372	ERK1 and ERK2 cascade, positive regulation of MAPK cascade, regulation of ERK1 and ERK2 cascade
9	GO:0043536	positive regulation of blood vessel endothelial cell migration	2	2	GO:0043534, GO:0010595, GO:0043535	blood vessel endothelial cell migration, positive regulation of endothelial cell migration, regulation of blood vessel endothelial cell migration
9	GO:0006607	NLS-bearing substrate import into nucleus	2	2	GO:0006606	protein import into nucleus
6	GO:0060947	cardiac vascular smooth muscle cell differentiation	2	2	GO:0060976, GO:0035886, GO:0035051	coronary vasculature development, vascular smooth muscle cell differentiation, cardiac cell differentiation
8	GO:0010738	regulation of protein kinase A signaling cascade	2	2	GO:0010627, GO:0010737	regulation of intracellular protein kinase cascade, protein kinase A signaling cascade
7	GO:0048662	negative regulation of smooth muscle cell proliferation	2	2	GO:0048660, GO:0008285, GO:0048659	regulation of smooth muscle cell proliferation, negative regulation of cell proliferation, smooth muscle cell proliferation
8	GO:0043124	negative regulation of I-kappaB kinase/NF-kappaB cascade	2	2	GO:0043122, GO:0010741, GO:0007249	regulation of I-kappaB kinase/NF-kappaB cascade, negative regulation of intracellular protein kinase cascade, I-kappaB kinase/NF-kappaB cascade
3	GO:0035264	multicellular organism growth	2	2	GO:0032501, GO:0040007	multicellular organismal process, growth
4	GO:0006970	response to osmotic stress	2	2	GO:0006950, GO:0009628	response to stress, response to abiotic stimulus
9	GO:0060083	smooth muscle contraction involved in micturition	2	2	GO:0060073, GO:0014832	micturition, urinary bladder smooth muscle contraction
12	GO:0048712	negative regulation of astrocyte differentiation	2	2	GO:0048710, GO:0045686, GO:0048708	regulation of astrocyte differentiation, negative regulation of glial cell differentiation, astrocyte differentiation
8	GO:0090263	positive regulation of canonical Wnt receptor signaling pathway	2	2	GO:0060828, GO:0060070, GO:0030177	regulation of canonical Wnt receptor signaling pathway, canonical Wnt receptor signaling pathway, positive regulation of Wnt receptor signaling pathway
7	GO:0060037	pharyngeal system development	2	2	GO:0048731, GO:0043009	system development, chordate embryonic development
8	GO:0000183	chromatin silencing at rDNA	2	2	GO:0006342	chromatin silencing
11	GO:0034138	toll-like receptor 3 signaling pathway	2	2	GO:0002224	toll-like receptor signaling pathway
9	GO:0046330	positive regulation of JNK cascade	2	2	GO:0046328, GO:0032874, GO:0007254	regulation of JNK cascade, positive regulation of stress-activated MAPK cascade, JNK cascade
6	GO:0008203	cholesterol metabolic process	2	2	GO:0016125	sterol metabolic process
9	GO:0032436	positive regulation of proteasomal ubiquitin-dependent protein catabolic process	2	2	GO:0043161, GO:0031331, GO:0045732, GO:0032434, GO:0045862	proteasomal ubiquitin-dependent protein catabolic process, positive regulation of cellular catabolic process, positive regulation of protein catabolic process, regulation of proteasomal ubiquitin-dependent protein catabolic process, positive regulation of proteolysis
8	GO:0006346	methylation-dependent chromatin silencing	2	2	GO:0006342, GO:0016569	chromatin silencing, covalent chromatin modification
11	GO:0034134	toll-like receptor 2 signaling pathway	2	2	GO:0002224	toll-like receptor signaling pathway
4	GO:0003013	circulatory system process	9	1.98	GO:0003008	system process
6	GO:0032103	positive regulation of response to external stimulus	5	1.99	GO:0009605, GO:0032101, GO:0048584	response to external stimulus, regulation of response to external stimulus, positive regulation of response to stimulus
7	GO:0021631	optic nerve morphogenesis	2	2	GO:0021554, GO:0021602	optic nerve development, cranial nerve morphogenesis
7	GO:2000020	positive regulation of male gonad development	2	2	GO:0051094, GO:2000018, GO:0008584, GO:2000243	positive regulation of developmental process, regulation of male gonad development, male gonad development, positive regulation of reproductive process
11	GO:0006919	activation of cysteine-type endopeptidase activity involved in apoptotic process	2	2	GO:0097202, GO:0006915, GO:0043280	activation of cysteine-type endopeptidase activity, apoptotic process, positive regulation of cysteine-type endopeptidase activity involved in apoptotic process
11	GO:0002755	MyD88-dependent toll-like receptor signaling pathway	2	2	GO:0002224	toll-like receptor signaling pathway
5	GO:0034616	response to laminar fluid shear stress	2	2	GO:0034405	response to fluid shear stress
6	GO:0030878	thyroid gland development	2	2	GO:0048732, GO:0035270	gland development, endocrine system development
8	GO:0009259	ribonucleotide metabolic process	17	1.99	GO:0009117	nucleotide metabolic process
8	GO:0045740	positive regulation of DNA replication	2	2	GO:0051054, GO:0006260, GO:0031328, GO:0010557, GO:0006275	positive regulation of DNA metabolic process, DNA replication, positive regulation of cellular biosynthetic process, positive regulation of macromolecule biosynthetic process, regulation of DNA replication
7	GO:0002053	positive regulation of mesenchymal cell proliferation	2	2	GO:0010464, GO:0008284, GO:0010463	regulation of mesenchymal cell proliferation, positive regulation of cell proliferation, mesenchymal cell proliferation
8	GO:0051898	negative regulation of protein kinase B signaling cascade	2	2	GO:0010741, GO:0043491, GO:0051896	negative regulation of intracellular protein kinase cascade, protein kinase B signaling cascade, regulation of protein kinase B signaling cascade
7	GO:0006895	Golgi to endosome transport	2	2	GO:0006892, GO:0016197	post-Golgi vesicle-mediated transport, endosomal transport
7	GO:2000195	negative regulation of female gonad development	2	2	GO:0008585, GO:2000242, GO:0051093, GO:2000194	female gonad development, negative regulation of reproductive process, negative regulation of developmental process, regulation of female gonad development
8	GO:0009141	nucleoside triphosphate metabolic process	17	1.99	GO:0009117	nucleotide metabolic process
7	GO:0032787	monocarboxylic acid metabolic process	8	1.98	GO:0019752	carboxylic acid metabolic process
6	GO:0097285	cell-type specific apoptotic process	9	1.99	GO:0006915	apoptotic process
4	GO:0009057	macromolecule catabolic process	14	1.97	GO:0043170, GO:0009056	macromolecule metabolic process, catabolic process
5	GO:0051101	regulation of DNA binding	3	1.96	GO:0051098	regulation of binding
9	GO:0035023	regulation of Rho protein signal transduction	3	1.96	GO:0046578, GO:0007266	regulation of Ras protein signal transduction, Rho protein signal transduction
7	GO:0051345	positive regulation of hydrolase activity	7	1.97	GO:0043085, GO:0051336	positive regulation of catalytic activity, regulation of hydrolase activity
8	GO:0035914	skeletal muscle cell differentiation	3	1.96	GO:0051146, GO:0007519	striated muscle cell differentiation, skeletal muscle tissue development
4	GO:0031668	cellular response to extracellular stimulus	8	1.96	GO:0071496, GO:0007154, GO:0051716, GO:0009991	cellular response to external stimulus, cell communication, cellular response to stimulus, response to extracellular stimulus
4	GO:0051098	regulation of binding	5	1.97	GO:0065009	regulation of molecular function
3	GO:0007059	chromosome segregation	3	1.96	GO:0009987	cellular process
6	GO:0006839	mitochondrial transport	3	1.96	GO:0046907	intracellular transport
8	GO:0018107	peptidyl-threonine phosphorylation	3	1.96	GO:0018210, GO:0006468	peptidyl-threonine modification, protein phosphorylation
6	GO:0070555	response to interleukin-1	3	1.96	GO:0034097	response to cytokine stimulus
6	GO:0030282	bone mineralization	3	1.96	GO:0001503, GO:0031214	ossification, biomineral tissue development
6	GO:0048709	oligodendrocyte differentiation	3	1.96	GO:0007417, GO:0010001	central nervous system development, glial cell differentiation
7	GO:0055080	cation homeostasis	10	1.93	GO:0050801	ion homeostasis
6	GO:0050880	regulation of blood vessel size	5	1.94	GO:0008015, GO:0003018, GO:0035150	blood circulation, vascular process in circulatory system, regulation of tube size
7	GO:0002791	regulation of peptide secretion	6	1.94	GO:0002790, GO:0051046, GO:0090087	peptide secretion, regulation of secretion, regulation of peptide transport
5	GO:0015833	peptide transport	8	1.92	GO:0006810	transport
4	GO:0035966	response to topologically incorrect protein	4	1.93	GO:0010033, GO:0006950	response to organic substance, response to stress
3	GO:0030534	adult behavior	3	1.92	GO:0032501, GO:0007610	multicellular organismal process, behavior
7	GO:0009746	response to hexose stimulus	4	1.93	GO:0034284	response to monosaccharide stimulus
5	GO:0043112	receptor metabolic process	3	1.92	GO:0044260	cellular macromolecule metabolic process
3	GO:0035265	organ growth	4	1.93	GO:0040007	growth
7	GO:0031331	positive regulation of cellular catabolic process	4	1.92	GO:0044248, GO:0031329, GO:0031325, GO:0009896	cellular catabolic process, regulation of cellular catabolic process, positive regulation of cellular metabolic process, positive regulation of catabolic process
4	GO:0000226	microtubule cytoskeleton organization	5	1.92	GO:0007017, GO:0007010	microtubule-based process, cytoskeleton organization
6	GO:0031018	endocrine pancreas development	2	1.92	GO:0031016, GO:0035270, GO:0048856	pancreas development, endocrine system development, anatomical structure development
5	GO:0045927	positive regulation of growth	4	1.92	GO:0040007, GO:0048518, GO:0040008	growth, positive regulation of biological process, regulation of growth
6	GO:0046545	development of primary female sexual characteristics	6	1.93	GO:0046660, GO:0045137	female sex differentiation, development of primary sexual characteristics
8	GO:0018205	peptidyl-lysine modification	4	1.91	GO:0018193	peptidyl-amino acid modification
8	GO:0000375	RNA splicing, via transesterification reactions	7	1.91	GO:0008380	RNA splicing
3	GO:0021700	developmental maturation	4	1.9	GO:0032502	developmental process
6	GO:0009953	dorsal/ventral pattern formation	2	1.91	GO:0003002	regionalization
5	GO:0006936	muscle contraction	5	1.89	GO:0003012	muscle system process
7	GO:0043087	regulation of GTPase activity	4	1.9	GO:0033124, GO:0051336	regulation of GTP catabolic process, regulation of hydrolase activity
5	GO:0032844	regulation of homeostatic process	5	1.91	GO:0042592, GO:0050789	homeostatic process, regulation of biological process
6	GO:0014031	mesenchymal cell development	6	1.87	GO:0048762, GO:0048468	mesenchymal cell differentiation, cell development
6	GO:0022612	gland morphogenesis	5	1.87	GO:0009653, GO:0048732	anatomical structure morphogenesis, gland development
8	GO:2000116	regulation of cysteine-type endopeptidase activity	5	1.87	GO:0052548	regulation of endopeptidase activity
5	GO:0071845	cellular component disassembly at cellular level	4	1.88	GO:0022411, GO:0071842	cellular component disassembly, cellular component organization at cellular level
5	GO:0040017	positive regulation of locomotion	4	1.85	GO:0040011, GO:0040012, GO:0048518	locomotion, regulation of locomotion, positive regulation of biological process
4	GO:0042180	cellular ketone metabolic process	13	1.86	GO:0044237, GO:0044281	cellular metabolic process, small molecule metabolic process
6	GO:0048285	organelle fission	8	1.86	GO:0006996	organelle organization
8	GO:0019228	regulation of action potential in neuron	5	1.84	GO:0001508, GO:0019226	regulation of action potential, transmission of nerve impulse
3	GO:0051707	response to other organism	8	1.84	GO:0051704, GO:0009607	multi-organism process, response to biotic stimulus
3	GO:0007586	digestion	4	1.85	GO:0032501	multicellular organismal process
6	GO:0043632	modification-dependent macromolecule catabolic process	9	1.83	GO:0044265	cellular macromolecule catabolic process
7	GO:0043254	regulation of protein complex assembly	5	1.82	GO:0051128, GO:0044087, GO:0006461	regulation of cellular component organization, regulation of cellular component biogenesis, protein complex assembly
7	GO:0051047	positive regulation of secretion	5	1.82	GO:0051050, GO:0051046, GO:0046903	positive regulation of transport, regulation of secretion, secretion
5	GO:0007498	mesoderm development	3	1.82	GO:0009888	tissue development
4	GO:0006403	RNA localization	6	1.82	GO:0033036	macromolecule localization
7	GO:0002040	sprouting angiogenesis	3	1.82	GO:0001525	angiogenesis
5	GO:0048678	response to axon injury	3	1.82	GO:0009611	response to wounding
4	GO:0009612	response to mechanical stimulus	3	1.82	GO:0009628, GO:0009605	response to abiotic stimulus, response to external stimulus
3	GO:0043616	keratinocyte proliferation	3	1.8	GO:0008283	cell proliferation
9	GO:0007173	epidermal growth factor receptor signaling pathway	5	1.8	GO:0038127	ERBB signaling pathway
7	GO:0014032	neural crest cell development	3	1.8	GO:0014033, GO:0014031	neural crest cell differentiation, mesenchymal cell development
9	GO:0032434	regulation of proteasomal ubiquitin-dependent protein catabolic process	3	1.8	GO:0061136, GO:0043161	regulation of proteasomal protein catabolic process, proteasomal ubiquitin-dependent protein catabolic process
3	GO:0051705	behavioral interaction between organisms	3	1.8	GO:0051704, GO:0007610	multi-organism process, behavior
5	GO:0001709	cell fate determination	3	1.8	GO:0048869, GO:0045165	cellular developmental process, cell fate commitment
8	GO:0042036	negative regulation of cytokine biosynthetic process	3	1.8	GO:0042035, GO:0031327, GO:0051248, GO:0010558, GO:0042089	regulation of cytokine biosynthetic process, negative regulation of cellular biosynthetic process, negative regulation of protein metabolic process, negative regulation of macromolecule biosynthetic process, cytokine biosynthetic process
9	GO:0070372	regulation of ERK1 and ERK2 cascade	3	1.8	GO:0070371, GO:0043408	ERK1 and ERK2 cascade, regulation of MAPK cascade
5	GO:2000243	positive regulation of reproductive process	3	1.8	GO:2000241, GO:0022414, GO:0048518	regulation of reproductive process, reproductive process, positive regulation of biological process
11	GO:0042531	positive regulation of tyrosine phosphorylation of STAT protein	2	1.8	GO:0042509, GO:0050731, GO:0046427, GO:0007260	regulation of tyrosine phosphorylation of STAT protein, positive regulation of peptidyl-tyrosine phosphorylation, positive regulation of JAK-STAT cascade, tyrosine phosphorylation of STAT protein
7	GO:0030111	regulation of Wnt receptor signaling pathway	5	1.8	GO:0016055, GO:0009966	Wnt receptor signaling pathway, regulation of signal transduction
7	GO:0043491	protein kinase B signaling cascade	3	1.8	GO:0007243	intracellular protein kinase cascade
10	GO:0045767	regulation of anti-apoptosis	3	1.8	GO:0050789, GO:0006916	regulation of biological process, anti-apoptosis
4	GO:0048659	smooth muscle cell proliferation	5	1.8	GO:0033002	muscle cell proliferation
9	GO:1901184	regulation of ERBB signaling pathway	5	1.8	GO:0038127, GO:0009966	ERBB signaling pathway, regulation of signal transduction
8	GO:0006641	triglyceride metabolic process	3	1.8	GO:0006639	acylglycerol metabolic process
7	GO:0030178	negative regulation of Wnt receptor signaling pathway	3	1.8	GO:0016055, GO:0030111, GO:0009968	Wnt receptor signaling pathway, regulation of Wnt receptor signaling pathway, negative regulation of signal transduction
12	GO:0030516	regulation of axon extension	2	1.8	GO:0048638, GO:0050770, GO:0048675, GO:0061387	regulation of developmental growth, regulation of axonogenesis, axon extension, regulation of extent of cell growth
6	GO:0071897	DNA biosynthetic process	3	1.8	GO:0034645, GO:0006259	cellular macromolecule biosynthetic process, DNA metabolic process
8	GO:0070371	ERK1 and ERK2 cascade	3	1.8	GO:0000165	MAPK cascade
11	GO:0071901	negative regulation of protein serine/threonine kinase activity	3	1.8	GO:0006469, GO:0071900	negative regulation of protein kinase activity, regulation of protein serine/threonine kinase activity
9	GO:0033135	regulation of peptidyl-serine phosphorylation	3	1.8	GO:0001932, GO:0018105	regulation of protein phosphorylation, peptidyl-serine phosphorylation
6	GO:0071248	cellular response to metal ion	3	1.8	GO:0071241, GO:0010038	cellular response to inorganic substance, response to metal ion
6	GO:0003281	ventricular septum development	3	1.8	GO:0003231, GO:0003279	cardiac ventricle development, cardiac septum development
9	GO:2000117	negative regulation of cysteine-type endopeptidase activity	3	1.8	GO:0010951, GO:2000116	negative regulation of endopeptidase activity, regulation of cysteine-type endopeptidase activity
7	GO:0007249	I-kappaB kinase/NF-kappaB cascade	5	1.8	GO:0007243	intracellular protein kinase cascade
8	GO:0051896	regulation of protein kinase B signaling cascade	3	1.8	GO:0010627, GO:0043491	regulation of intracellular protein kinase cascade, protein kinase B signaling cascade
7	GO:0061138	morphogenesis of a branching epithelium	3	1.8	GO:0001763, GO:0002009	morphogenesis of a branching structure, morphogenesis of an epithelium
5	GO:0071453	cellular response to oxygen levels	5	1.8	GO:0070887, GO:0070482	cellular response to chemical stimulus, response to oxygen levels
7	GO:0006405	RNA export from nucleus	3	1.8	GO:0051168, GO:0050658	nuclear export, RNA transport
7	GO:0007435	salivary gland morphogenesis	2	1.8	GO:0007431, GO:0022612	salivary gland development, gland morphogenesis
9	GO:0046626	regulation of insulin receptor signaling pathway	3	1.8	GO:0008286, GO:0009966, GO:1900076	insulin receptor signaling pathway, regulation of signal transduction, regulation of cellular response to insulin stimulus
10	GO:0040033	negative regulation of translation, ncRNA-mediated	3	1.8	GO:0045974, GO:0017148	regulation of translation, ncRNA-mediated, negative regulation of translation
6	GO:0090068	positive regulation of cell cycle process	3	1.8	GO:0022402, GO:0048522, GO:0010564	cell cycle process, positive regulation of cellular process, regulation of cell cycle process
8	GO:0010717	regulation of epithelial to mesenchymal transition	3	1.8	GO:0001837, GO:0010769, GO:2000026	epithelial to mesenchymal transition, regulation of cell morphogenesis involved in differentiation, regulation of multicellular organismal development
5	GO:0043200	response to amino acid stimulus	3	1.8	GO:0001101, GO:0014075	response to acid, response to amine stimulus
7	GO:0046058	cAMP metabolic process	5	1.79	GO:0009187, GO:0006163	cyclic nucleotide metabolic process, purine nucleotide metabolic process
5	GO:0001708	cell fate specification	3	1.79	GO:0048869, GO:0045165	cellular developmental process, cell fate commitment
7	GO:0071299	cellular response to vitamin A	3	1.8	GO:0071295, GO:0033189	cellular response to vitamin, response to vitamin A
6	GO:0045598	regulation of fat cell differentiation	3	1.8	GO:0045595, GO:0045444	regulation of cell differentiation, fat cell differentiation
6	GO:0002757	immune response-activating signal transduction	4	1.79	GO:0002764, GO:0002253	immune response-regulating signaling pathway, activation of immune response
5	GO:0050795	regulation of behavior	4	1.79	GO:0007610, GO:0048583	behavior, regulation of response to stimulus
7	GO:0046928	regulation of neurotransmitter secretion	3	1.8	GO:0051046, GO:0050804, GO:0060341, GO:0051588, GO:0007269	regulation of secretion, regulation of synaptic transmission, regulation of cellular localization, regulation of neurotransmitter transport, neurotransmitter secretion
9	GO:0030041	actin filament polymerization	2	1.8	GO:0008154, GO:0051258	actin polymerization or depolymerization, protein polymerization
7	GO:0008589	regulation of smoothened signaling pathway	3	1.8	GO:0009966, GO:0007224	regulation of signal transduction, smoothened signaling pathway
8	GO:0033344	cholesterol efflux	3	1.8	GO:0030301	cholesterol transport
7	GO:0051384	response to glucocorticoid stimulus	3	1.8	GO:0031960	response to corticosteroid stimulus
5	GO:0050807	regulation of synapse organization	4	1.8	GO:0051128, GO:0050808, GO:0050803, GO:0050794	regulation of cellular component organization, synapse organization, regulation of synapse structure and activity, regulation of cellular process
9	GO:0010874	regulation of cholesterol efflux	3	1.8	GO:0032374, GO:0033344	regulation of cholesterol transport, cholesterol efflux
6	GO:0061387	regulation of extent of cell growth	2	1.8	GO:0008361, GO:0001558	regulation of cell size, regulation of cell growth
4	GO:0007631	feeding behavior	3	1.8	GO:0007610	behavior
6	GO:0045834	positive regulation of lipid metabolic process	5	1.8	GO:0006629, GO:0019216, GO:0009893	lipid metabolic process, regulation of lipid metabolic process, positive regulation of metabolic process
5	GO:0071229	cellular response to acid	3	1.8	GO:0001101, GO:0070887	response to acid, cellular response to chemical stimulus
8	GO:0042306	regulation of protein import into nucleus	4	1.78	GO:0046822, GO:1900180, GO:0033157, GO:0034762, GO:0006606	regulation of nucleocytoplasmic transport, regulation of protein localization to nucleus, regulation of intracellular protein transport, regulation of transmembrane transport, protein import into nucleus
9	GO:0014013	regulation of gliogenesis	4	1.75	GO:0042063, GO:0050767	gliogenesis, regulation of neurogenesis
6	GO:0046890	regulation of lipid biosynthetic process	4	1.75	GO:0019216, GO:0009889, GO:0008610	regulation of lipid metabolic process, regulation of biosynthetic process, lipid biosynthetic process
6	GO:0009896	positive regulation of catabolic process	5	1.75	GO:0009893, GO:0009894, GO:0009056	positive regulation of metabolic process, regulation of catabolic process, catabolic process
7	GO:0030162	regulation of proteolysis	5	1.75	GO:0006508, GO:0051246	proteolysis, regulation of protein metabolic process
6	GO:0010675	regulation of cellular carbohydrate metabolic process	4	1.75	GO:0006109, GO:0031323, GO:0044262	regulation of carbohydrate metabolic process, regulation of cellular metabolic process, cellular carbohydrate metabolic process
6	GO:0031016	pancreas development	3	1.75	GO:0048513	organ development
6	GO:0006152	purine nucleoside catabolic process	12	1.74	GO:0072523, GO:0042278, GO:0009164	purine-containing compound catabolic process, purine nucleoside metabolic process, nucleoside catabolic process
6	GO:0042454	ribonucleoside catabolic process	12	1.74	GO:0009119, GO:0009164	ribonucleoside metabolic process, nucleoside catabolic process
4	GO:0007018	microtubule-based movement	3	1.72	GO:0007017, GO:0006928	microtubule-based process, cellular component movement
10	GO:0007204	elevation of cytosolic calcium ion concentration	3	1.73	GO:0051480	cytosolic calcium ion homeostasis
4	GO:0090066	regulation of anatomical structure size	10	1.73	GO:0065008	regulation of biological quality
7	GO:0002218	activation of innate immune response	3	1.71	GO:0045089, GO:0002253	positive regulation of innate immune response, activation of immune response
9	GO:0006826	iron ion transport	3	1.72	GO:0000041	transition metal ion transport
4	GO:0032535	regulation of cellular component size	5	1.72	GO:0090066, GO:0016043	regulation of anatomical structure size, cellular component organization
4	GO:0007588	excretion	3	1.72	GO:0003008	system process
8	GO:0070838	divalent metal ion transport	6	1.73	GO:0030001, GO:0072511	metal ion transport, divalent inorganic cation transport
10	GO:0033124	regulation of GTP catabolic process	5	1.74	GO:0033121, GO:0006184	regulation of purine nucleotide catabolic process, GTP catabolic process
4	GO:0015980	energy derivation by oxidation of organic compounds	5	1.71	GO:0055114, GO:0006091	oxidation-reduction process, generation of precursor metabolites and energy
4	GO:0003012	muscle system process	8	1.7	GO:0003008	system process
7	GO:0033143	regulation of intracellular steroid hormone receptor signaling pathway	3	1.68	GO:0009966, GO:0030518	regulation of signal transduction, intracellular steroid hormone receptor signaling pathway
5	GO:0046661	male sex differentiation	6	1.68	GO:0007275, GO:0007548	multicellular organismal development, sex differentiation
10	GO:0050731	positive regulation of peptidyl-tyrosine phosphorylation	3	1.68	GO:0001934, GO:0050730, GO:0018108	positive regulation of protein phosphorylation, regulation of peptidyl-tyrosine phosphorylation, peptidyl-tyrosine phosphorylation
9	GO:0032271	regulation of protein polymerization	3	1.68	GO:0051258, GO:0043254, GO:0050794	protein polymerization, regulation of protein complex assembly, regulation of cellular process
6	GO:0001818	negative regulation of cytokine production	3	1.68	GO:0051241, GO:0001817, GO:0001816	negative regulation of multicellular organismal process, regulation of cytokine production, cytokine production
8	GO:0002793	positive regulation of peptide secretion	3	1.68	GO:0002790, GO:0051047, GO:0002791	peptide secretion, positive regulation of secretion, regulation of peptide secretion
3	GO:0001816	cytokine production	7	1.68	GO:0032501	multicellular organismal process
8	GO:0051168	nuclear export	3	1.68	GO:0006913	nucleocytoplasmic transport
6	GO:0006638	neutral lipid metabolic process	4	1.65	GO:0044255	cellular lipid metabolic process
5	GO:0060173	limb development	4	1.66	GO:0048736	appendage development
5	GO:0035107	appendage morphogenesis	4	1.66	GO:0009653, GO:0048736	anatomical structure morphogenesis, appendage development
7	GO:0033157	regulation of intracellular protein transport	5	1.67	GO:0051223, GO:0006886, GO:0032386	regulation of protein transport, intracellular protein transport, regulation of intracellular transport
10	GO:0030816	positive regulation of cAMP metabolic process	3	1.63	GO:0030801, GO:0030814, GO:1900544, GO:0046058	positive regulation of cyclic nucleotide metabolic process, regulation of cAMP metabolic process, positive regulation of purine nucleotide metabolic process, cAMP metabolic process
10	GO:1900373	positive regulation of purine nucleotide biosynthetic process	3	1.63	GO:0006164, GO:0030810, GO:1900544, GO:1900371	purine nucleotide biosynthetic process, positive regulation of nucleotide biosynthetic process, positive regulation of purine nucleotide metabolic process, regulation of purine nucleotide biosynthetic process
10	GO:0030804	positive regulation of cyclic nucleotide biosynthetic process	3	1.63	GO:0030802, GO:0030801, GO:0009190, GO:0030810	regulation of cyclic nucleotide biosynthetic process, positive regulation of cyclic nucleotide metabolic process, cyclic nucleotide biosynthetic process, positive regulation of nucleotide biosynthetic process
10	GO:0030817	regulation of cAMP biosynthetic process	3	1.63	GO:0030802, GO:0006171, GO:0030814, GO:1900371	regulation of cyclic nucleotide biosynthetic process, cAMP biosynthetic process, regulation of cAMP metabolic process, regulation of purine nucleotide biosynthetic process
4	GO:0046483	heterocycle metabolic process	24	1.64	GO:0044237	cellular metabolic process
8	GO:0006171	cAMP biosynthetic process	3	1.63	GO:0046058, GO:0006164, GO:0009190	cAMP metabolic process, purine nucleotide biosynthetic process, cyclic nucleotide biosynthetic process
6	GO:0042278	purine nucleoside metabolic process	14	1.62	GO:0009116, GO:0072521	nucleoside metabolic process, purine-containing compound metabolic process
6	GO:0009119	ribonucleoside metabolic process	14	1.62	GO:0009116	nucleoside metabolic process
7	GO:0010563	negative regulation of phosphorus metabolic process	8	1.59	GO:0006793, GO:0051174, GO:0031324	phosphorus metabolic process, regulation of phosphorus metabolic process, negative regulation of cellular metabolic process
9	GO:0006376	mRNA splice site selection	2	1.6	GO:0000245, GO:0022618	spliceosomal complex assembly, ribonucleoprotein complex assembly
8	GO:0060765	regulation of androgen receptor signaling pathway	2	1.6	GO:0033143, GO:0030521	regulation of intracellular steroid hormone receptor signaling pathway, androgen receptor signaling pathway
7	GO:0017156	calcium ion-dependent exocytosis	2	1.6	GO:0006887	exocytosis
9	GO:0034261	negative regulation of Ras GTPase activity	2	1.6	GO:0034260, GO:0032318	negative regulation of GTPase activity, regulation of Ras GTPase activity
8	GO:0000187	activation of MAPK activity	2	1.6	GO:0043406, GO:0006468, GO:0032147	positive regulation of MAP kinase activity, protein phosphorylation, activation of protein kinase activity
6	GO:0071371	cellular response to gonadotropin stimulus	2	1.6	GO:0034698, GO:0032870	response to gonadotropin stimulus, cellular response to hormone stimulus
8	GO:0045717	negative regulation of fatty acid biosynthetic process	2	1.6	GO:0051055, GO:0031327, GO:0045922, GO:0006633, GO:0042304	negative regulation of lipid biosynthetic process, negative regulation of cellular biosynthetic process, negative regulation of fatty acid metabolic process, fatty acid biosynthetic process, regulation of fatty acid biosynthetic process
8	GO:0001553	luteinization	2	1.6	GO:0061039, GO:0022602	ovum-producing ovary development, ovulation cycle process
7	GO:0022408	negative regulation of cell-cell adhesion	2	1.6	GO:0016337, GO:0022407, GO:0007162	cell-cell adhesion, regulation of cell-cell adhesion, negative regulation of cell adhesion
9	GO:0003215	cardiac right ventricle morphogenesis	2	1.6	GO:0003208	cardiac ventricle morphogenesis
5	GO:0034332	adherens junction organization	2	1.6	GO:0045216	cell-cell junction organization
7	GO:0030500	regulation of bone mineralization	2	1.6	GO:0070167, GO:0030278, GO:0030282	regulation of biomineral tissue development, regulation of ossification, bone mineralization
5	GO:0003310	pancreatic A cell differentiation	2	1.6	GO:0030154, GO:0031018	cell differentiation, endocrine pancreas development
7	GO:0060603	mammary gland duct morphogenesis	2	1.6	GO:0061180, GO:0060443, GO:0060562	mammary gland epithelium development, mammary gland morphogenesis, epithelial tube morphogenesis
6	GO:0016079	synaptic vesicle exocytosis	2	1.6	GO:0006887, GO:0048489, GO:0007269	exocytosis, synaptic vesicle transport, neurotransmitter secretion
8	GO:0090316	positive regulation of intracellular protein transport	2	1.6	GO:0033157, GO:0006886, GO:0032388, GO:0051222	regulation of intracellular protein transport, intracellular protein transport, positive regulation of intracellular transport, positive regulation of protein transport
8	GO:0000956	nuclear-transcribed mRNA catabolic process	2	1.6	GO:0006402	mRNA catabolic process
6	GO:0033365	protein localization to organelle	9	1.6	GO:0034613	cellular protein localization
7	GO:0060113	inner ear receptor cell differentiation	2	1.6	GO:0048839, GO:0042490	inner ear development, mechanoreceptor differentiation
6	GO:0071479	cellular response to ionizing radiation	2	1.6	GO:0071478, GO:0010212	cellular response to radiation, response to ionizing radiation
7	GO:0071347	cellular response to interleukin-1	2	1.6	GO:0070555, GO:0071345	response to interleukin-1, cellular response to cytokine stimulus
7	GO:0030320	cellular monovalent inorganic anion homeostasis	2	1.6	GO:0055083, GO:0030002	monovalent inorganic anion homeostasis, cellular anion homeostasis
6	GO:0042541	hemoglobin biosynthetic process	2	1.6	GO:0020027, GO:0034645	hemoglobin metabolic process, cellular macromolecule biosynthetic process
8	GO:0006302	double-strand break repair	2	1.6	GO:0006281	DNA repair
10	GO:2000757	negative regulation of peptidyl-lysine acetylation	2	1.6	GO:0031400, GO:0018394, GO:2000756	negative regulation of protein modification process, peptidyl-lysine acetylation, regulation of peptidyl-lysine acetylation
8	GO:0046320	regulation of fatty acid oxidation	2	1.6	GO:0019217, GO:0019395	regulation of fatty acid metabolic process, fatty acid oxidation
7	GO:0021520	spinal cord motor neuron cell fate specification	2	1.6	GO:0048665, GO:0021522	neuron fate specification, spinal cord motor neuron differentiation
7	GO:0050810	regulation of steroid biosynthetic process	2	1.6	GO:0019218, GO:0006694, GO:0046890	regulation of steroid metabolic process, steroid biosynthetic process, regulation of lipid biosynthetic process
6	GO:0016525	negative regulation of angiogenesis	2	1.6	GO:0001525, GO:0051093, GO:0045765	angiogenesis, negative regulation of developmental process, regulation of angiogenesis
6	GO:0045445	myoblast differentiation	2	1.6	GO:0042692	muscle cell differentiation
8	GO:0001843	neural tube closure	2	1.6	GO:0014020, GO:0060606	primary neural tube formation, tube closure
6	GO:0050921	positive regulation of chemotaxis	2	1.6	GO:0048520, GO:0050920, GO:0032103, GO:0006935, GO:0040017	positive regulation of behavior, regulation of chemotaxis, positive regulation of response to external stimulus, chemotaxis, positive regulation of locomotion
12	GO:0010390	histone monoubiquitination	2	1.6	GO:0006513, GO:0016574	protein monoubiquitination, histone ubiquitination
7	GO:0006626	protein targeting to mitochondrion	2	1.6	GO:0006605, GO:0017038, GO:0007005, GO:0072655, GO:0006839	protein targeting, protein import, mitochondrion organization, establishment of protein localization in mitochondrion, mitochondrial transport
7	GO:0060078	regulation of postsynaptic membrane potential	2	1.6	GO:0042391, GO:0007268	regulation of membrane potential, synaptic transmission
8	GO:0010517	regulation of phospholipase activity	2	1.6	GO:0060191	regulation of lipase activity
6	GO:0043388	positive regulation of DNA binding	2	1.6	GO:0051099, GO:0051101	positive regulation of binding, regulation of DNA binding
6	GO:0034614	cellular response to reactive oxygen species	2	1.6	GO:0034599, GO:0000302	cellular response to oxidative stress, response to reactive oxygen species
6	GO:0014047	glutamate secretion	2	1.6	GO:0032940, GO:0023061	secretion by cell, signal release
6	GO:0048752	semicircular canal morphogenesis	2	1.6	GO:0035239, GO:0042472, GO:0060872, GO:0048598	tube morphogenesis, inner ear morphogenesis, semicircular canal development, embryonic morphogenesis
8	GO:0051291	protein heterooligomerization	2	1.6	GO:0051259	protein oligomerization
9	GO:0072332	signal transduction by p53 class mediator resulting in induction of apoptosis	2	1.6	GO:0072331, GO:0008629	signal transduction by p53 class mediator, induction of apoptosis by intracellular signals
9	GO:0061097	regulation of protein tyrosine kinase activity	2	1.6	GO:0045859	regulation of protein kinase activity
5	GO:0031669	cellular response to nutrient levels	7	1.61	GO:0031667, GO:0031668	response to nutrient levels, cellular response to extracellular stimulus
9	GO:0032319	regulation of Rho GTPase activity	2	1.6	GO:0032318, GO:0035023	regulation of Ras GTPase activity, regulation of Rho protein signal transduction
6	GO:0045785	positive regulation of cell adhesion	2	1.6	GO:0030155, GO:0007155, GO:0048522	regulation of cell adhesion, cell adhesion, positive regulation of cellular process
4	GO:0010817	regulation of hormone levels	12	1.59	GO:0065008	regulation of biological quality
8	GO:0030252	growth hormone secretion	2	1.6	GO:0030072	peptide hormone secretion
10	GO:0045737	positive regulation of cyclin-dependent protein kinase activity	2	1.6	GO:0071902, GO:0045787, GO:0000079	positive regulation of protein serine/threonine kinase activity, positive regulation of cell cycle, regulation of cyclin-dependent protein kinase activity
7	GO:0035924	cellular response to vascular endothelial growth factor stimulus	2	1.6	GO:0071363	cellular response to growth factor stimulus
8	GO:0043547	positive regulation of GTPase activity	2	1.6	GO:0051345, GO:0043087	positive regulation of hydrolase activity, regulation of GTPase activity
9	GO:0003266	regulation of secondary heart field cardioblast proliferation	2	1.6	GO:0003264	regulation of cardioblast proliferation
5	GO:0060384	innervation	2	1.6	GO:0032502, GO:0021675	developmental process, nerve development
9	GO:0010827	regulation of glucose transport	2	1.6	GO:0015758, GO:0051049	glucose transport, regulation of transport
5	GO:0048469	cell maturation	2	1.6	GO:0048468, GO:0048869, GO:0021700	cell development, cellular developmental process, developmental maturation
5	GO:0060430	lung saccule development	2	1.6	GO:0048856, GO:0048286	anatomical structure development, lung alveolus development
7	GO:0043586	tongue development	2	1.6	GO:0007423	sensory organ development
6	GO:0003143	embryonic heart tube morphogenesis	2	1.6	GO:0003007, GO:0035050, GO:0048598, GO:0060562	heart morphogenesis, embryonic heart tube development, embryonic morphogenesis, epithelial tube morphogenesis
5	GO:0021549	cerebellum development	2	1.6	GO:0022037, GO:0048856	metencephalon development, anatomical structure development
7	GO:0046847	filopodium assembly	2	1.6	GO:0030031	cell projection assembly
8	GO:0019229	regulation of vasoconstriction	2	1.6	GO:0044057, GO:0042310	regulation of system process, vasoconstriction
5	GO:0050905	neuromuscular process	2	1.6	GO:0050877	neurological system process
5	GO:0044265	cellular macromolecule catabolic process	12	1.58	GO:0044260, GO:0044248, GO:0009057	cellular macromolecule metabolic process, cellular catabolic process, macromolecule catabolic process
6	GO:0021513	spinal cord dorsal/ventral patterning	2	1.58	GO:0009953, GO:0021511	dorsal/ventral pattern formation, spinal cord patterning
5	GO:0050776	regulation of immune response	7	1.57	GO:0006955, GO:0002682, GO:0048583	immune response, regulation of immune system process, regulation of response to stimulus
6	GO:0031644	regulation of neurological system process	9	1.58	GO:0044057, GO:0050877	regulation of system process, neurological system process
6	GO:0034101	erythrocyte homeostasis	3	1.58	GO:0048872	homeostasis of number of cells
6	GO:0051588	regulation of neurotransmitter transport	3	1.56	GO:0006836, GO:0051049	neurotransmitter transport, regulation of transport
10	GO:0008629	induction of apoptosis by intracellular signals	3	1.56	GO:0006917	induction of apoptosis
7	GO:0001942	hair follicle development	2	1.56	GO:0022405, GO:0008544	hair cycle process, epidermis development
6	GO:0071219	cellular response to molecule of bacterial origin	3	1.56	GO:0002237, GO:0071216	response to molecule of bacterial origin, cellular response to biotic stimulus
6	GO:0060976	coronary vasculature development	3	1.56	GO:0001568, GO:0007507	blood vessel development, heart development
6	GO:2000177	regulation of neural precursor cell proliferation	3	1.56	GO:0042127, GO:0061351	regulation of cell proliferation, neural precursor cell proliferation
8	GO:0032924	activin receptor signaling pathway	3	1.56	GO:0007178	transmembrane receptor protein serine/threonine kinase signaling pathway
8	GO:0043535	regulation of blood vessel endothelial cell migration	3	1.56	GO:0010594, GO:0043534	regulation of endothelial cell migration, blood vessel endothelial cell migration
4	GO:0006790	sulfur compound metabolic process	2	1.56	GO:0044237	cellular metabolic process
8	GO:0048168	regulation of neuronal synaptic plasticity	3	1.56	GO:0048167	regulation of synaptic plasticity
3	GO:0007163	establishment or maintenance of cell polarity	2	1.56	GO:0009987	cellular process
6	GO:0022407	regulation of cell-cell adhesion	3	1.56	GO:0016337, GO:0030155	cell-cell adhesion, regulation of cell adhesion
7	GO:0043506	regulation of JUN kinase activity	3	1.56	GO:0046328, GO:0043405	regulation of JNK cascade, regulation of MAP kinase activity
5	GO:0051647	nucleus localization	3	1.56	GO:0051640	organelle localization
5	GO:0019395	fatty acid oxidation	3	1.56	GO:0034440, GO:0006631	lipid oxidation, fatty acid metabolic process
6	GO:0044257	cellular protein catabolic process	10	1.56	GO:0044267, GO:0030163, GO:0044265	cellular protein metabolic process, protein catabolic process, cellular macromolecule catabolic process
8	GO:0018212	peptidyl-tyrosine modification	5	1.56	GO:0018193	peptidyl-amino acid modification
6	GO:0021522	spinal cord motor neuron differentiation	2	1.56	GO:0021517, GO:0021515, GO:0021953	ventral spinal cord development, cell differentiation in spinal cord, central nervous system neuron differentiation
9	GO:0051928	positive regulation of calcium ion transport	3	1.56	GO:0051924, GO:0006816, GO:0043270	regulation of calcium ion transport, calcium ion transport, positive regulation of ion transport
5	GO:0031214	biomineral tissue development	4	1.54	GO:0009888, GO:0048513	tissue development, organ development
4	GO:0031589	cell-substrate adhesion	4	1.54	GO:0007155	cell adhesion
5	GO:0072012	glomerulus vasculature development	2	1.52	GO:0061440, GO:0001568, GO:0032835	kidney vasculature development, blood vessel development, glomerulus development
7	GO:0030879	mammary gland development	4	1.52	GO:0048732	gland development
6	GO:0051952	regulation of amine transport	2	1.51	GO:0015837, GO:0051049	amine transport, regulation of transport
8	GO:0051170	nuclear import	6	1.5	GO:0006913	nucleocytoplasmic transport
5	GO:0043436	oxoacid metabolic process	13	1.48	GO:0042180, GO:0006082	cellular ketone metabolic process, organic acid metabolic process
5	GO:0016053	organic acid biosynthetic process	6	1.46	GO:0044283, GO:0006082, GO:0044249	small molecule biosynthetic process, organic acid metabolic process, cellular biosynthetic process
5	GO:0002683	negative regulation of immune system process	5	1.46	GO:0002682, GO:0048519, GO:0002376	regulation of immune system process, negative regulation of biological process, immune system process
6	GO:0006112	energy reserve metabolic process	2	1.43	GO:0015980	energy derivation by oxidation of organic compounds
5	GO:0046700	heterocycle catabolic process	17	1.43	GO:0046483, GO:0044248	heterocycle metabolic process, cellular catabolic process
6	GO:0006753	nucleoside phosphate metabolic process	22	1.43	GO:0055086	nucleobase-containing small molecule metabolic process
7	GO:0048015	phosphatidylinositol-mediated signaling	4	1.44	GO:0048017	inositol lipid-mediated signaling
8	GO:0043488	regulation of mRNA stability	4	1.44	GO:0043487	regulation of RNA stability
5	GO:0034655	nucleobase-containing compound catabolic process	17	1.43	GO:0044270, GO:0006139	cellular nitrogen compound catabolic process, nucleobase-containing compound metabolic process
8	GO:0043489	RNA stabilization	4	1.44	GO:0043487	regulation of RNA stability
6	GO:0045333	cellular respiration	3	1.42	GO:0015980	energy derivation by oxidation of organic compounds
6	GO:0046488	phosphatidylinositol metabolic process	3	1.42	GO:0006650	glycerophospholipid metabolic process
6	GO:0060759	regulation of response to cytokine stimulus	3	1.42	GO:0034097, GO:0048583	response to cytokine stimulus, regulation of response to stimulus
7	GO:0051048	negative regulation of secretion	3	1.42	GO:0051046, GO:0051051, GO:0046903	regulation of secretion, negative regulation of transport, secretion
6	GO:0060348	bone development	2	1.42	GO:0001501, GO:0048856	skeletal system development, anatomical structure development
5	GO:0051302	regulation of cell division	3	1.42	GO:0051301, GO:0050794	cell division, regulation of cellular process
4	GO:0022600	digestive system process	3	1.42	GO:0007586, GO:0003008	digestion, system process
4	GO:0071214	cellular response to abiotic stimulus	4	1.39	GO:0051716, GO:0009628	cellular response to stimulus, response to abiotic stimulus
6	GO:0048663	neuron fate commitment	3	1.39	GO:0030182, GO:0045165	neuron differentiation, cell fate commitment
6	GO:0032102	negative regulation of response to external stimulus	3	1.39	GO:0048585, GO:0032101, GO:0009605	negative regulation of response to stimulus, regulation of response to external stimulus, response to external stimulus
6	GO:0045833	negative regulation of lipid metabolic process	4	1.39	GO:0019216, GO:0006629, GO:0009892	regulation of lipid metabolic process, lipid metabolic process, negative regulation of metabolic process
4	GO:1901135	carbohydrate derivative metabolic process	19	1.39	GO:0071704	organic substance metabolic process
4	GO:0071774	response to fibroblast growth factor stimulus	4	1.39	GO:0009719, GO:0070848	response to endogenous stimulus, response to growth factor stimulus
6	GO:0007272	ensheathment of neurons	4	1.39	GO:0019228, GO:0007399, GO:0009987	regulation of action potential in neuron, nervous system development, cellular process
7	GO:0051589	negative regulation of neurotransmitter transport	2	1.39	GO:0051588, GO:0006836, GO:0051051	regulation of neurotransmitter transport, neurotransmitter transport, negative regulation of transport
6	GO:0072331	signal transduction by p53 class mediator	2	1.39	GO:0035556	intracellular signal transduction
6	GO:0048644	muscle organ morphogenesis	5	1.38	GO:0007517, GO:0009887	muscle organ development, organ morphogenesis
7	GO:0072143	mesangial cell development	2	1.36	GO:0048468, GO:0072007	cell development, mesangial cell differentiation
6	GO:0060349	bone morphogenesis	2	1.37	GO:0060348, GO:0009653, GO:0048705	bone development, anatomical structure morphogenesis, skeletal system morphogenesis
5	GO:0051236	establishment of RNA localization	5	1.37	GO:0051234, GO:0006403	establishment of localization, RNA localization
6	GO:0050657	nucleic acid transport	5	1.37	GO:0015931	nucleobase-containing compound transport
8	GO:0008156	negative regulation of DNA replication	2	1.36	GO:0006260, GO:0051053, GO:2000113, GO:0006275	DNA replication, negative regulation of DNA metabolic process, negative regulation of cellular macromolecule biosynthetic process, regulation of DNA replication
6	GO:0015918	sterol transport	3	1.37	GO:0006869	lipid transport
6	GO:0034341	response to interferon-gamma	2	1.36	GO:0034097, GO:0045087	response to cytokine stimulus, innate immune response
8	GO:0042069	regulation of catecholamine metabolic process	2	1.36	GO:0080090, GO:0006584, GO:0033238	regulation of primary metabolic process, catecholamine metabolic process, regulation of cellular amine metabolic process
7	GO:0001959	regulation of cytokine-mediated signaling pathway	2	1.36	GO:0060759, GO:0009966, GO:0019221	regulation of response to cytokine stimulus, regulation of signal transduction, cytokine-mediated signaling pathway
8	GO:0016572	histone phosphorylation	2	1.36	GO:0006468, GO:0016570	protein phosphorylation, histone modification
7	GO:0002042	cell migration involved in sprouting angiogenesis	2	1.36	GO:0043534, GO:0002040	blood vessel endothelial cell migration, sprouting angiogenesis
6	GO:0060047	heart contraction	2	1.36	GO:0008015, GO:0003015	blood circulation, heart process
9	GO:0033077	T cell differentiation in thymus	2	1.36	GO:0030217	T cell differentiation
6	GO:0045638	negative regulation of myeloid cell differentiation	2	1.36	GO:0045637, GO:0045596, GO:0030099	regulation of myeloid cell differentiation, negative regulation of cell differentiation, myeloid cell differentiation
7	GO:0007368	determination of left/right symmetry	2	1.36	GO:0009855	determination of bilateral symmetry
7	GO:0007126	meiosis	2	1.36	GO:0022403, GO:0051327	cell cycle phase, M phase of meiotic cell cycle
6	GO:0050777	negative regulation of immune response	2	1.36	GO:0002683, GO:0050776, GO:0048585, GO:0006955	negative regulation of immune system process, regulation of immune response, negative regulation of response to stimulus, immune response
4	GO:0007006	mitochondrial membrane organization	2	1.36	GO:0016044, GO:0007005	cellular membrane organization, mitochondrion organization
6	GO:0001821	histamine secretion	2	1.36	GO:0046903, GO:0051608	secretion, histamine transport
7	GO:0030857	negative regulation of epithelial cell differentiation	2	1.36	GO:0030855, GO:0045596, GO:0030856	epithelial cell differentiation, negative regulation of cell differentiation, regulation of epithelial cell differentiation
9	GO:0031103	axon regeneration	2	1.36	GO:0048678, GO:0007409, GO:0031102	response to axon injury, axonogenesis, neuron projection regeneration
6	GO:0031347	regulation of defense response	5	1.35	GO:0080134, GO:0006952	regulation of response to stress, defense response
5	GO:0006304	DNA modification	2	1.34	GO:0043412, GO:0006259	macromolecule modification, DNA metabolic process
7	GO:0031047	gene silencing by RNA	4	1.35	GO:0016458	gene silencing
8	GO:0070302	regulation of stress-activated protein kinase signaling cascade	7	1.34	GO:0010627, GO:0080135, GO:0031098	regulation of intracellular protein kinase cascade, regulation of cellular response to stress, stress-activated protein kinase signaling cascade
7	GO:0016441	posttranscriptional gene silencing	4	1.35	GO:0040029, GO:0010608, GO:0016458	regulation of gene expression, epigenetic, posttranscriptional regulation of gene expression, gene silencing
7	GO:0022904	respiratory electron transport chain	2	1.36	GO:0022900, GO:0045333	electron transport chain, cellular respiration
6	GO:0060761	negative regulation of response to cytokine stimulus	2	1.36	GO:0060759, GO:0034097, GO:0048585	regulation of response to cytokine stimulus, response to cytokine stimulus, negative regulation of response to stimulus
4	GO:0009566	fertilization	2	1.36	GO:0022414, GO:0019953	reproductive process, sexual reproduction
6	GO:0051169	nuclear transport	9	1.33	GO:0046907	intracellular transport
6	GO:0048762	mesenchymal cell differentiation	7	1.34	GO:0060485, GO:0030154	mesenchyme development, cell differentiation
8	GO:0070646	protein modification by small protein removal	3	1.32	GO:0070647	protein modification by small protein conjugation or removal
5	GO:0060485	mesenchyme development	7	1.33	GO:0009888, GO:0048513	tissue development, organ development
6	GO:0031076	embryonic camera-type eye development	3	1.33	GO:0048568, GO:0043010	embryonic organ development, camera-type eye development
7	GO:0001508	regulation of action potential	6	1.32	GO:0042391	regulation of membrane potential
5	GO:0051099	positive regulation of binding	3	1.32	GO:0051098, GO:0044093	regulation of binding, positive regulation of molecular function
10	GO:2000756	regulation of peptidyl-lysine acetylation	3	1.32	GO:0018394, GO:0031399	peptidyl-lysine acetylation, regulation of protein modification process
7	GO:0048048	embryonic eye morphogenesis	3	1.33	GO:0048592, GO:0048562	eye morphogenesis, embryonic organ morphogenesis
10	GO:0014014	negative regulation of gliogenesis	3	1.32	GO:0042063, GO:0014013, GO:0050768	gliogenesis, regulation of gliogenesis, negative regulation of neurogenesis
7	GO:0034764	positive regulation of transmembrane transport	3	1.32	GO:0051050, GO:0055085, GO:0048522, GO:0034762	positive regulation of transport, transmembrane transport, positive regulation of cellular process, regulation of transmembrane transport
7	GO:0060443	mammary gland morphogenesis	3	1.32	GO:0030879, GO:0022612	mammary gland development, gland morphogenesis
7	GO:0051055	negative regulation of lipid biosynthetic process	3	1.32	GO:0008610, GO:0045833, GO:0046890, GO:0009890	lipid biosynthetic process, negative regulation of lipid metabolic process, regulation of lipid biosynthetic process, negative regulation of biosynthetic process
6	GO:0051971	positive regulation of transmission of nerve impulse	3	1.32	GO:0023056, GO:0031646, GO:0051969, GO:0019226, GO:0010647	positive regulation of signaling, positive regulation of neurological system process, regulation of transmission of nerve impulse, transmission of nerve impulse, positive regulation of cell communication
5	GO:0043393	regulation of protein binding	3	1.32	GO:0051098	regulation of binding
6	GO:0002064	epithelial cell development	3	1.32	GO:0048468, GO:0030855	cell development, epithelial cell differentiation
5	GO:0071478	cellular response to radiation	3	1.32	GO:0071214, GO:0009314	cellular response to abiotic stimulus, response to radiation
5	GO:0022037	metencephalon development	3	1.32	GO:0048856, GO:0030902	anatomical structure development, hindbrain development
5	GO:0006575	cellular modified amino acid metabolic process	3	1.32	GO:0006520	cellular amino acid metabolic process
7	GO:0021954	central nervous system neuron development	3	1.32	GO:0048666, GO:0021953	neuron development, central nervous system neuron differentiation
6	GO:0007162	negative regulation of cell adhesion	3	1.32	GO:0048523, GO:0030155, GO:0007155	negative regulation of cellular process, regulation of cell adhesion, cell adhesion
7	GO:0030330	DNA damage response, signal transduction by p53 class mediator	2	1.32	GO:0072331, GO:0042770	signal transduction by p53 class mediator, signal transduction in response to DNA damage
9	GO:2001056	positive regulation of cysteine-type endopeptidase activity	3	1.32	GO:0010950, GO:2000116	positive regulation of endopeptidase activity, regulation of cysteine-type endopeptidase activity
3	GO:0010463	mesenchymal cell proliferation	3	1.32	GO:0008283	cell proliferation
6	GO:0060428	lung epithelium development	2	1.32	GO:0030324, GO:0060429	lung development, epithelium development
8	GO:0016574	histone ubiquitination	2	1.32	GO:0016567, GO:0016570	protein ubiquitination, histone modification
5	GO:0050920	regulation of chemotaxis	3	1.32	GO:0050795, GO:0032101, GO:0006935, GO:0040012	regulation of behavior, regulation of response to external stimulus, chemotaxis, regulation of locomotion
7	GO:0001837	epithelial to mesenchymal transition	3	1.32	GO:0000904, GO:0014031	cell morphogenesis involved in differentiation, mesenchymal cell development
7	GO:0008064	regulation of actin polymerization or depolymerization	2	1.32	GO:0030832, GO:0008154	regulation of actin filament length, actin polymerization or depolymerization
6	GO:0048665	neuron fate specification	2	1.32	GO:0001708, GO:0048663	cell fate specification, neuron fate commitment
8	GO:0009187	cyclic nucleotide metabolic process	5	1.31	GO:0009123	nucleoside monophosphate metabolic process
3	GO:0061351	neural precursor cell proliferation	3	1.3	GO:0008283	cell proliferation
4	GO:0051640	organelle localization	3	1.3	GO:0051641	cellular localization
3	GO:0033002	muscle cell proliferation	6	1.3	GO:0008283	cell proliferation
6	GO:0072224	metanephric glomerulus development	2	1.31	GO:0072210, GO:0032835	metanephric nephron development, glomerulus development
8	GO:0051258	protein polymerization	3	1.3	GO:0043623	cellular protein complex assembly
8	GO:0030509	BMP signaling pathway	4	1.3	GO:0007178	transmembrane receptor protein serine/threonine kinase signaling pathway
4	GO:0070997	neuron death	6	1.3	GO:0008219	cell death
5	GO:0009743	response to carbohydrate stimulus	4	1.29	GO:0010033	response to organic substance
8	GO:0072507	divalent inorganic cation homeostasis	6	1.3	GO:0055080	cation homeostasis
5	GO:0005996	monosaccharide metabolic process	6	1.3	GO:0005975	carbohydrate metabolic process
6	GO:0030258	lipid modification	5	1.28	GO:0044255	cellular lipid metabolic process
6	GO:0009954	proximal/distal pattern formation	2	1.26	GO:0003002	regionalization
6	GO:0051272	positive regulation of cellular component movement	4	1.25	GO:0051270, GO:0048522, GO:0006928	regulation of cellular component movement, positive regulation of cellular process, cellular component movement
5	GO:0021987	cerebral cortex development	3	1.26	GO:0021543, GO:0048856	pallium development, anatomical structure development
6	GO:0006109	regulation of carbohydrate metabolic process	5	1.27	GO:0080090, GO:0005975	regulation of primary metabolic process, carbohydrate metabolic process
8	GO:0033673	negative regulation of kinase activity	4	1.25	GO:0051348, GO:0043549	negative regulation of transferase activity, regulation of kinase activity
5	GO:0035272	exocrine system development	3	1.25	GO:0048731	system development
6	GO:0050778	positive regulation of immune response	5	1.24	GO:0006955, GO:0050776, GO:0048584, GO:0002684	immune response, regulation of immune response, positive regulation of response to stimulus, positive regulation of immune system process
8	GO:0046425	regulation of JAK-STAT cascade	3	1.25	GO:0010627, GO:0007259	regulation of intracellular protein kinase cascade, JAK-STAT cascade
5	GO:0045185	maintenance of protein location	4	1.23	GO:0051235, GO:0008104	maintenance of location, protein localization
8	GO:1900542	regulation of purine nucleotide metabolic process	7	1.21	GO:0006140, GO:0006163	regulation of nucleotide metabolic process, purine nucleotide metabolic process
4	GO:0006725	cellular aromatic compound metabolic process	4	1.21	GO:0044237	cellular metabolic process
6	GO:0007422	peripheral nervous system development	2	1.22	GO:0007399, GO:0048731	nervous system development, system development
8	GO:0045862	positive regulation of proteolysis	2	1.2	GO:0032270, GO:0006508, GO:0030162	positive regulation of cellular protein metabolic process, proteolysis, regulation of proteolysis
8	GO:0034767	positive regulation of ion transmembrane transport	2	1.2	GO:0034765, GO:0043270, GO:0034764, GO:0034220	regulation of ion transmembrane transport, positive regulation of ion transport, positive regulation of transmembrane transport, ion transmembrane transport
7	GO:0010970	microtubule-based transport	2	1.2	GO:0007018, GO:0030705	microtubule-based movement, cytoskeleton-dependent intracellular transport
5	GO:0060073	micturition	2	1.2	GO:0007588, GO:0003014	excretion, renal system process
8	GO:0032109	positive regulation of response to nutrient levels	2	1.2	GO:0032106, GO:0031667, GO:0032107	positive regulation of response to extracellular stimulus, response to nutrient levels, regulation of response to nutrient levels
8	GO:0055072	iron ion homeostasis	2	1.2	GO:0055080	cation homeostasis
4	GO:0071772	response to BMP stimulus	2	1.2	GO:0009719, GO:0070848	response to endogenous stimulus, response to growth factor stimulus
7	GO:0051963	regulation of synapse assembly	2	1.2	GO:0044087, GO:0007416, GO:0051960, GO:0050807	regulation of cellular component biogenesis, synapse assembly, regulation of nervous system development, regulation of synapse organization
9	GO:0048024	regulation of nuclear mRNA splicing, via spliceosome	2	1.2	GO:0050684, GO:0000398, GO:0043484	regulation of mRNA processing, nuclear mRNA splicing, via spliceosome, regulation of RNA splicing
7	GO:0071384	cellular response to corticosteroid stimulus	2	1.2	GO:0071383, GO:0031960	cellular response to steroid hormone stimulus, response to corticosteroid stimulus
4	GO:0042596	fear response	2	1.2	GO:0033555	multicellular organismal response to stress
6	GO:0010948	negative regulation of cell cycle process	2	1.2	GO:0048523, GO:0022402, GO:0010564	negative regulation of cellular process, cell cycle process, regulation of cell cycle process
7	GO:0001885	endothelial cell development	2	1.2	GO:0002064, GO:0045446	epithelial cell development, endothelial cell differentiation
7	GO:0030177	positive regulation of Wnt receptor signaling pathway	2	1.2	GO:0016055, GO:0030111, GO:0009967	Wnt receptor signaling pathway, regulation of Wnt receptor signaling pathway, positive regulation of signal transduction
8	GO:1900077	negative regulation of cellular response to insulin stimulus	2	1.2	GO:0048523, GO:0032869, GO:0048585, GO:1900076	negative regulation of cellular process, cellular response to insulin stimulus, negative regulation of response to stimulus, regulation of cellular response to insulin stimulus
9	GO:0032874	positive regulation of stress-activated MAPK cascade	2	1.2	GO:0032872, GO:0070304, GO:0043410, GO:0051403	regulation of stress-activated MAPK cascade, positive regulation of stress-activated protein kinase signaling cascade, positive regulation of MAPK cascade, stress-activated MAPK cascade
7	GO:0030004	cellular monovalent inorganic cation homeostasis	2	1.2	GO:0030003, GO:0055067	cellular cation homeostasis, monovalent inorganic cation homeostasis
6	GO:0050688	regulation of defense response to virus	2	1.2	GO:0002697, GO:0051607, GO:0031347, GO:0002831, GO:0043900	regulation of immune effector process, defense response to virus, regulation of defense response, regulation of response to biotic stimulus, regulation of multi-organism process
6	GO:0014046	dopamine secretion	2	1.2	GO:0050432, GO:0023061, GO:0015872	catecholamine secretion, signal release, dopamine transport
7	GO:0010921	regulation of phosphatase activity	2	1.2	GO:0051336, GO:0035303	regulation of hydrolase activity, regulation of dephosphorylation
7	GO:0072203	cell proliferation involved in metanephros development	2	1.2	GO:0072111, GO:0001656	cell proliferation involved in kidney development, metanephros development
6	GO:0043496	regulation of protein homodimerization activity	2	1.2	GO:0043393	regulation of protein binding
8	GO:0051225	spindle assembly	2	1.2	GO:0070925, GO:0007051	organelle assembly, spindle organization
5	GO:0007052	mitotic spindle organization	2	1.2	GO:0000278, GO:0007051, GO:0022402	mitotic cell cycle, spindle organization, cell cycle process
5	GO:2000242	negative regulation of reproductive process	2	1.2	GO:0022414, GO:2000241, GO:0048519	reproductive process, regulation of reproductive process, negative regulation of biological process
6	GO:0048639	positive regulation of developmental growth	2	1.2	GO:0051094, GO:0048638, GO:0045927, GO:0048589	positive regulation of developmental process, regulation of developmental growth, positive regulation of growth, developmental growth
8	GO:0043516	regulation of DNA damage response, signal transduction by p53 class mediator	2	1.2	GO:0030330, GO:0009966, GO:2001020	DNA damage response, signal transduction by p53 class mediator, regulation of signal transduction, regulation of response to DNA damage stimulus
10	GO:0060251	regulation of glial cell proliferation	2	1.2	GO:0042127, GO:0014013, GO:0014009	regulation of cell proliferation, regulation of gliogenesis, glial cell proliferation
9	GO:0010640	regulation of platelet-derived growth factor receptor signaling pathway	2	1.2	GO:0048008, GO:0009966	platelet-derived growth factor receptor signaling pathway, regulation of signal transduction
8	GO:0016573	histone acetylation	2	1.2	GO:0018393, GO:0016570	internal peptidyl-lysine acetylation, histone modification
4	GO:0002209	behavioral defense response	2	1.2	GO:0006952, GO:0007610	defense response, behavior
9	GO:0032272	negative regulation of protein polymerization	2	1.2	GO:0048523, GO:0051258, GO:0031333, GO:0032271	negative regulation of cellular process, protein polymerization, negative regulation of protein complex assembly, regulation of protein polymerization
9	GO:0046636	negative regulation of alpha-beta T cell activation	2	1.2	GO:0046631, GO:0046634, GO:0050868	alpha-beta T cell activation, regulation of alpha-beta T cell activation, negative regulation of T cell activation
8	GO:0014910	regulation of smooth muscle cell migration	2	1.2	GO:0030334, GO:0014909	regulation of cell migration, smooth muscle cell migration
8	GO:0010508	positive regulation of autophagy	2	1.2	GO:0031331, GO:0006914, GO:0010506	positive regulation of cellular catabolic process, autophagy, regulation of autophagy
8	GO:0021554	optic nerve development	2	1.2	GO:0021545	cranial nerve development
5	GO:0061008	hepaticobiliary system development	2	1.2	GO:0048731	system development
6	GO:0010464	regulation of mesenchymal cell proliferation	2	1.2	GO:0042127, GO:0010463	regulation of cell proliferation, mesenchymal cell proliferation
4	GO:0055086	nucleobase-containing small molecule metabolic process	24	1.2	GO:0006139, GO:0044281	nucleobase-containing compound metabolic process, small molecule metabolic process
10	GO:0015682	ferric iron transport	2	1.2	GO:0006826	iron ion transport
7	GO:0010737	protein kinase A signaling cascade	2	1.2	GO:0007243	intracellular protein kinase cascade
8	GO:0033146	regulation of intracellular estrogen receptor signaling pathway	2	1.2	GO:0030520, GO:0033143	intracellular estrogen receptor signaling pathway, regulation of intracellular steroid hormone receptor signaling pathway
8	GO:0048701	embryonic cranial skeleton morphogenesis	2	1.2	GO:0048704	embryonic skeletal system morphogenesis
7	GO:2000018	regulation of male gonad development	2	1.2	GO:2000241, GO:0008584, GO:2000026	regulation of reproductive process, male gonad development, regulation of multicellular organismal development
6	GO:0072006	nephron development	2	1.19	GO:0001822, GO:0048856	kidney development, anatomical structure development
7	GO:0035886	vascular smooth muscle cell differentiation	2	1.2	GO:0051145, GO:0001944	smooth muscle cell differentiation, vasculature development
8	GO:0014832	urinary bladder smooth muscle contraction	2	1.2	GO:0014848	urinary tract smooth muscle contraction
7	GO:0051153	regulation of striated muscle cell differentiation	2	1.2	GO:0051146, GO:0051147	striated muscle cell differentiation, regulation of muscle cell differentiation
7	GO:0031958	corticosteroid receptor signaling pathway	2	1.2	GO:0030518	intracellular steroid hormone receptor signaling pathway
8	GO:0070509	calcium ion import	2	1.2	GO:0070588	calcium ion transmembrane transport
5	GO:0014075	response to amine stimulus	4	1.21	GO:0010243	response to organic nitrogen
6	GO:0050433	regulation of catecholamine secretion	2	1.2	GO:0051952, GO:0051046, GO:0060341, GO:0050432	regulation of amine transport, regulation of secretion, regulation of cellular localization, catecholamine secretion
11	GO:0048710	regulation of astrocyte differentiation	2	1.2	GO:0045685, GO:0048708	regulation of glial cell differentiation, astrocyte differentiation
8	GO:0090279	regulation of calcium ion import	2	1.2	GO:0051924, GO:0070509, GO:0034765	regulation of calcium ion transport, calcium ion import, regulation of ion transmembrane transport
8	GO:0016241	regulation of macroautophagy	2	1.2	GO:0080135, GO:0010646, GO:0016236, GO:0010506, GO:0032107	regulation of cellular response to stress, regulation of cell communication, macroautophagy, regulation of autophagy, regulation of response to nutrient levels
6	GO:0050953	sensory perception of light stimulus	2	1.2	GO:0007600	sensory perception
8	GO:0006448	regulation of translational elongation	2	1.2	GO:0006417, GO:0006414	regulation of translation, translational elongation
5	GO:0071417	cellular response to organic nitrogen	4	1.21	GO:0071310, GO:0071495, GO:0010243	cellular response to organic substance, cellular response to endogenous stimulus, response to organic nitrogen
11	GO:0060402	calcium ion transport into cytosol	2	1.22	GO:0007204, GO:0060401	elevation of cytosolic calcium ion concentration, cytosolic calcium ion transport
5	GO:0048880	sensory system development	2	1.22	GO:0048731	system development
7	GO:0006164	purine nucleotide biosynthetic process	4	1.2	GO:0009165, GO:0072522, GO:0006163	nucleotide biosynthetic process, purine-containing compound biosynthetic process, purine nucleotide metabolic process
5	GO:0016125	sterol metabolic process	2	1.2	GO:0008202, GO:0006066	steroid metabolic process, alcohol metabolic process
9	GO:0035065	regulation of histone acetylation	2	1.2	GO:0031056, GO:2000756, GO:0016573	regulation of histone modification, regulation of peptidyl-lysine acetylation, histone acetylation
5	GO:0009755	hormone-mediated signaling pathway	2	1.2	GO:0007165, GO:0032870	signal transduction, cellular response to hormone stimulus
6	GO:0001676	long-chain fatty acid metabolic process	2	1.2	GO:0006631	fatty acid metabolic process
11	GO:0042516	regulation of tyrosine phosphorylation of Stat3 protein	2	1.2	GO:0042503, GO:0042509	tyrosine phosphorylation of Stat3 protein, regulation of tyrosine phosphorylation of STAT protein
4	GO:0009266	response to temperature stimulus	2	1.2	GO:0009628	response to abiotic stimulus
9	GO:0031952	regulation of protein autophosphorylation	2	1.2	GO:0001932, GO:0046777	regulation of protein phosphorylation, protein autophosphorylation
8	GO:0090100	positive regulation of transmembrane receptor protein serine/threonine kinase signaling pathway	2	1.2	GO:0090092, GO:0007178, GO:0009967	regulation of transmembrane receptor protein serine/threonine kinase signaling pathway, transmembrane receptor protein serine/threonine kinase signaling pathway, positive regulation of signal transduction
11	GO:0045686	negative regulation of glial cell differentiation	2	1.2	GO:0045685, GO:0010001, GO:0014014	regulation of glial cell differentiation, glial cell differentiation, negative regulation of gliogenesis
6	GO:0042398	cellular modified amino acid biosynthetic process	2	1.2	GO:0006575, GO:0008652	cellular modified amino acid metabolic process, cellular amino acid biosynthetic process
8	GO:0032376	positive regulation of cholesterol transport	2	1.2	GO:0030301, GO:0032373, GO:0032374	cholesterol transport, positive regulation of sterol transport, regulation of cholesterol transport
11	GO:0000380	alternative nuclear mRNA splicing, via spliceosome	2	1.2	GO:0000398	nuclear mRNA splicing, via spliceosome
7	GO:2000194	regulation of female gonad development	2	1.2	GO:0008585, GO:2000241, GO:2000026	female gonad development, regulation of reproductive process, regulation of multicellular organismal development
3	GO:0007632	visual behavior	2	1.2	GO:0032501, GO:0007610, GO:0009416	multicellular organismal process, behavior, response to light stimulus
4	GO:0034405	response to fluid shear stress	2	1.2	GO:0006950	response to stress
9	GO:0060393	regulation of pathway-restricted SMAD protein phosphorylation	2	1.2	GO:0001932, GO:0090092, GO:0060389	regulation of protein phosphorylation, regulation of transmembrane receptor protein serine/threonine kinase signaling pathway, pathway-restricted SMAD protein phosphorylation
10	GO:0097202	activation of cysteine-type endopeptidase activity	2	1.2	GO:2001056	positive regulation of cysteine-type endopeptidase activity
6	GO:2001022	positive regulation of response to DNA damage stimulus	2	1.2	GO:0006974, GO:0048522, GO:2001020, GO:0048584	response to DNA damage stimulus, positive regulation of cellular process, regulation of response to DNA damage stimulus, positive regulation of response to stimulus
6	GO:2000377	regulation of reactive oxygen species metabolic process	2	1.2	GO:0031323, GO:0072593	regulation of cellular metabolic process, reactive oxygen species metabolic process
7	GO:0051438	regulation of ubiquitin-protein ligase activity	2	1.2	GO:0031396, GO:0051340	regulation of protein ubiquitination, regulation of ligase activity
11	GO:0002756	MyD88-independent toll-like receptor signaling pathway	2	1.2	GO:0002224	toll-like receptor signaling pathway
6	GO:0048145	regulation of fibroblast proliferation	2	1.2	GO:0042127, GO:0048144	regulation of cell proliferation, fibroblast proliferation
7	GO:0055092	sterol homeostasis	2	1.2	GO:0055088	lipid homeostasis
7	GO:0033144	negative regulation of intracellular steroid hormone receptor signaling pathway	2	1.2	GO:0030518, GO:0033143, GO:0009968	intracellular steroid hormone receptor signaling pathway, regulation of intracellular steroid hormone receptor signaling pathway, negative regulation of signal transduction
8	GO:0032412	regulation of ion transmembrane transporter activity	2	1.2	GO:0034765, GO:0022898	regulation of ion transmembrane transport, regulation of transmembrane transporter activity
10	GO:0002753	cytoplasmic pattern recognition receptor signaling pathway	2	1.2	GO:0030522, GO:0002221	intracellular receptor mediated signaling pathway, pattern recognition receptor signaling pathway
8	GO:0009214	cyclic nucleotide catabolic process	2	1.2	GO:0009125, GO:0009187	nucleoside monophosphate catabolic process, cyclic nucleotide metabolic process
8	GO:0010002	cardioblast differentiation	2	1.2	GO:0035051	cardiac cell differentiation
7	GO:0001952	regulation of cell-matrix adhesion	2	1.2	GO:0007160, GO:0010810	cell-matrix adhesion, regulation of cell-substrate adhesion
6	GO:0034612	response to tumor necrosis factor	2	1.2	GO:0034097	response to cytokine stimulus
7	GO:0010771	negative regulation of cell morphogenesis involved in differentiation	2	1.2	GO:0000904, GO:0010721, GO:0051129, GO:0010769	cell morphogenesis involved in differentiation, negative regulation of cell development, negative regulation of cellular component organization, regulation of cell morphogenesis involved in differentiation
6	GO:0035872	nucleotide-binding domain, leucine rich repeat containing receptor signaling pathway	2	1.2	GO:0030522	intracellular receptor mediated signaling pathway
8	GO:0034470	ncRNA processing	2	1.2	GO:0034660, GO:0006396	ncRNA metabolic process, RNA processing
6	GO:0045637	regulation of myeloid cell differentiation	2	1.18	GO:0030099, GO:0045595, GO:0002682, GO:2000026	myeloid cell differentiation, regulation of cell differentiation, regulation of immune system process, regulation of multicellular organismal development
7	GO:0006584	catecholamine metabolic process	2	1.18	GO:0006576, GO:0009712	cellular biogenic amine metabolic process, catechol-containing compound metabolic process
6	GO:0009108	coenzyme biosynthetic process	3	1.18	GO:0006732, GO:0051188	coenzyme metabolic process, cofactor biosynthetic process
9	GO:0018394	peptidyl-lysine acetylation	3	1.18	GO:0006473, GO:0018205	protein acetylation, peptidyl-lysine modification
6	GO:0015837	amine transport	4	1.18	GO:0071702, GO:0071705	organic substance transport, nitrogen compound transport
7	GO:0072202	cell differentiation involved in metanephros development	2	1.18	GO:0001656, GO:0061005	metanephros development, cell differentiation involved in kidney development
6	GO:0034284	response to monosaccharide stimulus	4	1.16	GO:0009743	response to carbohydrate stimulus
5	GO:0035150	regulation of tube size	5	1.17	GO:0090066	regulation of anatomical structure size
8	GO:0018210	peptidyl-threonine modification	3	1.18	GO:0018193	peptidyl-amino acid modification
6	GO:0090087	regulation of peptide transport	6	1.17	GO:0015833, GO:0051049	peptide transport, regulation of transport
7	GO:0061180	mammary gland epithelium development	2	1.18	GO:0030879, GO:0060429	mammary gland development, epithelium development
5	GO:0002684	positive regulation of immune system process	7	1.17	GO:0002682, GO:0002376, GO:0048518	regulation of immune system process, immune system process, positive regulation of biological process
4	GO:0071496	cellular response to external stimulus	8	1.18	GO:0009605	response to external stimulus
6	GO:0045913	positive regulation of carbohydrate metabolic process	3	1.18	GO:0006109, GO:0009893, GO:0005975	regulation of carbohydrate metabolic process, positive regulation of metabolic process, carbohydrate metabolic process
6	GO:0043255	regulation of carbohydrate biosynthetic process	4	1.15	GO:0006109, GO:0016051, GO:0009889	regulation of carbohydrate metabolic process, carbohydrate biosynthetic process, regulation of biosynthetic process
6	GO:0007369	gastrulation	4	1.16	GO:0048598	embryonic morphogenesis
5	GO:0003018	vascular process in circulatory system	5	1.17	GO:0003013	circulatory system process
6	GO:0072073	kidney epithelium development	2	1.16	GO:0001822, GO:0060429	kidney development, epithelium development
6	GO:0046486	glycerolipid metabolic process	6	1.16	GO:0044255	cellular lipid metabolic process
6	GO:0010639	negative regulation of organelle organization	3	1.15	GO:0048523, GO:0033043, GO:0006996, GO:0051129	negative regulation of cellular process, regulation of organelle organization, organelle organization, negative regulation of cellular component organization
5	GO:0046660	female sex differentiation	6	1.16	GO:0007275, GO:0007548	multicellular organismal development, sex differentiation
6	GO:0051223	regulation of protein transport	5	1.14	GO:0070201, GO:0015031, GO:0051049	regulation of establishment of protein localization, protein transport, regulation of transport
4	GO:0022411	cellular component disassembly	4	1.13	GO:0016043	cellular component organization
6	GO:0006929	substrate-dependent cell migration	2	1.13	GO:0016477	cell migration
5	GO:0021543	pallium development	4	1.12	GO:0021537, GO:0048856	telencephalon development, anatomical structure development
8	GO:0052548	regulation of endopeptidase activity	5	1.12	GO:0052547	regulation of peptidase activity
5	GO:0002694	regulation of leukocyte activation	5	1.09	GO:0050865, GO:0045321, GO:0002682	regulation of cell activation, leukocyte activation, regulation of immune system process
5	GO:0071241	cellular response to inorganic substance	3	1.08	GO:0070887, GO:0010035	cellular response to chemical stimulus, response to inorganic substance
8	GO:0010951	negative regulation of endopeptidase activity	3	1.08	GO:0052548, GO:0010466	regulation of endopeptidase activity, negative regulation of peptidase activity
7	GO:0071295	cellular response to vitamin	3	1.08	GO:0033273, GO:0031670	response to vitamin, cellular response to nutrient
7	GO:2001020	regulation of response to DNA damage stimulus	2	1.08	GO:0080135, GO:0006974	regulation of cellular response to stress, response to DNA damage stimulus
5	GO:0050803	regulation of synapse structure and activity	4	1.08	GO:0065008, GO:0007268	regulation of biological quality, synaptic transmission
8	GO:1900076	regulation of cellular response to insulin stimulus	3	1.08	GO:0032869, GO:0050794, GO:0048583	cellular response to insulin stimulus, regulation of cellular process, regulation of response to stimulus
8	GO:0032374	regulation of cholesterol transport	3	1.08	GO:0030301, GO:0032371	cholesterol transport, regulation of sterol transport
6	GO:0007431	salivary gland development	2	1.08	GO:0035272, GO:0048732	exocrine system development, gland development
7	GO:0014033	neural crest cell differentiation	3	1.08	GO:0048762	mesenchymal cell differentiation
6	GO:0009165	nucleotide biosynthetic process	5	1.08	GO:0034654, GO:0009117	nucleobase-containing compound biosynthetic process, nucleotide metabolic process
5	GO:0048588	developmental cell growth	2	1.08	GO:0048468, GO:0016049, GO:0048589	cell development, cell growth, developmental growth
7	GO:0042035	regulation of cytokine biosynthetic process	3	1.08	GO:0010556, GO:0001817, GO:0031326, GO:0042089, GO:0051246	regulation of macromolecule biosynthetic process, regulation of cytokine production, regulation of cellular biosynthetic process, cytokine biosynthetic process, regulation of protein metabolic process
6	GO:0071322	cellular response to carbohydrate stimulus	2	1.08	GO:0071310, GO:0009743	cellular response to organic substance, response to carbohydrate stimulus
6	GO:0002764	immune response-regulating signaling pathway	4	1.07	GO:0050776, GO:0007165	regulation of immune response, signal transduction
8	GO:0045974	regulation of translation, ncRNA-mediated	3	1.08	GO:0006417	regulation of translation
6	GO:0072111	cell proliferation involved in kidney development	2	1.08	GO:0008283, GO:0001822	cell proliferation, kidney development
6	GO:0008154	actin polymerization or depolymerization	2	1.08	GO:0007015, GO:0034621	actin filament organization, cellular macromolecular complex subunit organization
6	GO:0006639	acylglycerol metabolic process	3	1.08	GO:0006638, GO:0046486	neutral lipid metabolic process, glycerolipid metabolic process
8	GO:0046427	positive regulation of JAK-STAT cascade	2	1.08	GO:0046425, GO:0007259, GO:0010740	regulation of JAK-STAT cascade, JAK-STAT cascade, positive regulation of intracellular protein kinase cascade
9	GO:0048675	axon extension	2	1.08	GO:0060560, GO:0007409, GO:0048588	developmental growth involved in morphogenesis, axonogenesis, developmental cell growth
7	GO:0046822	regulation of nucleocytoplasmic transport	4	1.07	GO:0006913, GO:0032386	nucleocytoplasmic transport, regulation of intracellular transport
8	GO:1900180	regulation of protein localization to nucleus	4	1.07	GO:0034504, GO:0060341, GO:0032880	protein localization to nucleus, regulation of cellular localization, regulation of protein localization
5	GO:0002253	activation of immune response	4	1.07	GO:0050778, GO:0002376	positive regulation of immune response, immune system process
10	GO:0042509	regulation of tyrosine phosphorylation of STAT protein	2	1.08	GO:0046425, GO:0050730, GO:0007260	regulation of JAK-STAT cascade, regulation of peptidyl-tyrosine phosphorylation, tyrosine phosphorylation of STAT protein
8	GO:0046634	regulation of alpha-beta T cell activation	2	1.08	GO:0050863, GO:0046631	regulation of T cell activation, alpha-beta T cell activation
8	GO:0038127	ERBB signaling pathway	5	1.08	GO:0007169	transmembrane receptor protein tyrosine kinase signaling pathway
9	GO:0051480	cytosolic calcium ion homeostasis	3	1.04	GO:0006874	cellular calcium ion homeostasis
6	GO:0009164	nucleoside catabolic process	12	1.04	GO:0034655, GO:1901136, GO:0009116	nucleobase-containing compound catabolic process, carbohydrate derivative catabolic process, nucleoside metabolic process
8	GO:0033121	regulation of purine nucleotide catabolic process	5	1.04	GO:0030811, GO:1900542, GO:0006195	regulation of nucleotide catabolic process, regulation of purine nucleotide metabolic process, purine nucleotide catabolic process
6	GO:0031348	negative regulation of defense response	2	1.03	GO:0006952, GO:0048585, GO:0031347	defense response, negative regulation of response to stimulus, regulation of defense response
7	GO:0045089	positive regulation of innate immune response	3	1.03	GO:0050778, GO:0045087, GO:0045088, GO:0031349	positive regulation of immune response, innate immune response, regulation of innate immune response, positive regulation of defense response
8	GO:0000041	transition metal ion transport	3	1.03	GO:0030001	metal ion transport
7	GO:0072511	divalent inorganic cation transport	6	1.04	GO:0006812	cation transport
5	GO:0044270	cellular nitrogen compound catabolic process	17	1.03	GO:0044248, GO:0034641	cellular catabolic process, cellular nitrogen compound metabolic process
6	GO:0032409	regulation of transporter activity	3	1.03	GO:0065009, GO:0051049	regulation of molecular function, regulation of transport
5	GO:0050865	regulation of cell activation	6	1.02	GO:0001775, GO:0050794	cell activation, regulation of cellular process
4	GO:1901136	carbohydrate derivative catabolic process	15	1.01	GO:1901135, GO:0009056	carbohydrate derivative metabolic process, catabolic process
6	GO:0032386	regulation of intracellular transport	5	1	GO:0060341, GO:0046907, GO:0051049	regulation of cellular localization, intracellular transport, regulation of transport
9	GO:0050730	regulation of peptidyl-tyrosine phosphorylation	3	1.01	GO:0001932, GO:0018108	regulation of protein phosphorylation, peptidyl-tyrosine phosphorylation
7	GO:0050863	regulation of T cell activation	3	1.01	GO:0051249, GO:0042110	regulation of lymphocyte activation, T cell activation
4	GO:0048736	appendage development	4	0.99	GO:0007275, GO:0048856	multicellular organismal development, anatomical structure development
4	GO:0006066	alcohol metabolic process	4	0.97	GO:0044281	small molecule metabolic process
9	GO:0030814	regulation of cAMP metabolic process	3	0.98	GO:0030799, GO:1900542, GO:0046058	regulation of cyclic nucleotide metabolic process, regulation of purine nucleotide metabolic process, cAMP metabolic process
8	GO:0030810	positive regulation of nucleotide biosynthetic process	3	0.98	GO:0045981, GO:0031328, GO:0009165, GO:0030808	positive regulation of nucleotide metabolic process, positive regulation of cellular biosynthetic process, nucleotide biosynthetic process, regulation of nucleotide biosynthetic process
8	GO:1900371	regulation of purine nucleotide biosynthetic process	3	0.98	GO:0006164, GO:1900542, GO:0030808	purine nucleotide biosynthetic process, regulation of purine nucleotide metabolic process, regulation of nucleotide biosynthetic process
9	GO:0030802	regulation of cyclic nucleotide biosynthetic process	3	0.98	GO:0030799, GO:0009190, GO:0030808	regulation of cyclic nucleotide metabolic process, cyclic nucleotide biosynthetic process, regulation of nucleotide biosynthetic process
9	GO:1900544	positive regulation of purine nucleotide metabolic process	3	0.98	GO:0006163, GO:0045981, GO:1900542	purine nucleotide metabolic process, positive regulation of nucleotide metabolic process, regulation of purine nucleotide metabolic process
9	GO:0030801	positive regulation of cyclic nucleotide metabolic process	3	0.98	GO:0009187, GO:0045981, GO:0030799	cyclic nucleotide metabolic process, positive regulation of nucleotide metabolic process, regulation of cyclic nucleotide metabolic process
6	GO:0009116	nucleoside metabolic process	14	0.97	GO:1901135, GO:0055086	carbohydrate derivative metabolic process, nucleobase-containing small molecule metabolic process
4	GO:0045216	cell-cell junction organization	2	0.96	GO:0034330	cell junction organization
6	GO:0048286	lung alveolus development	2	0.96	GO:0030324, GO:0048856	lung development, anatomical structure development
7	GO:0032388	positive regulation of intracellular transport	2	0.96	GO:0051050, GO:0046907, GO:0032386	positive regulation of transport, intracellular transport, regulation of intracellular transport
7	GO:0051494	negative regulation of cytoskeleton organization	2	0.96	GO:0010639, GO:0007010, GO:0051493	negative regulation of organelle organization, cytoskeleton organization, regulation of cytoskeleton organization
5	GO:0035050	embryonic heart tube development	2	0.96	GO:0035295, GO:0007507, GO:0009790	tube development, heart development, embryo development
6	GO:0071396	cellular response to lipid	2	0.96	GO:0071310, GO:0033993	cellular response to organic substance, response to lipid
8	GO:0010676	positive regulation of cellular carbohydrate metabolic process	2	0.96	GO:0010675, GO:0045913, GO:0031325, GO:0044262	regulation of cellular carbohydrate metabolic process, positive regulation of carbohydrate metabolic process, positive regulation of cellular metabolic process, cellular carbohydrate metabolic process
7	GO:0042310	vasoconstriction	2	0.96	GO:0050880	regulation of blood vessel size
5	GO:0010092	specification of organ identity	2	0.96	GO:0048645, GO:0003002	organ formation, regionalization
8	GO:0072655	establishment of protein localization in mitochondrion	2	0.96	GO:0072594, GO:0070585	establishment of protein localization to organelle, protein localization in mitochondrion
6	GO:0030728	ovulation	2	0.96	GO:0048609, GO:0007292	multicellular organismal reproductive process, female gamete generation
8	GO:0043409	negative regulation of MAPK cascade	2	0.96	GO:0010741, GO:0043408, GO:0000165	negative regulation of intracellular protein kinase cascade, regulation of MAPK cascade, MAPK cascade
5	GO:0034698	response to gonadotropin stimulus	2	0.96	GO:0009725	response to hormone stimulus
7	GO:0051899	membrane depolarization	2	0.96	GO:0042391	regulation of membrane potential
6	GO:0007416	synapse assembly	2	0.96	GO:0007399, GO:0050808, GO:0071844	nervous system development, synapse organization, cellular component assembly at cellular level
10	GO:0006513	protein monoubiquitination	2	0.96	GO:0016567	protein ubiquitination
6	GO:0071616	acyl-CoA biosynthetic process	2	0.96	GO:0035384, GO:0006637, GO:0009108	thioester biosynthetic process, acyl-CoA metabolic process, coenzyme biosynthetic process
8	GO:0045620	negative regulation of lymphocyte differentiation	2	0.96	GO:0030098, GO:0045596, GO:0051250, GO:0045619	lymphocyte differentiation, negative regulation of cell differentiation, negative regulation of lymphocyte activation, regulation of lymphocyte differentiation
8	GO:0042308	negative regulation of protein import into nucleus	2	0.96	GO:0006606, GO:0034763, GO:0042306, GO:0046823, GO:0090317	protein import into nucleus, negative regulation of transmembrane transport, regulation of protein import into nucleus, negative regulation of nucleocytoplasmic transport, negative regulation of intracellular protein transport
7	GO:0006909	phagocytosis	2	0.96	GO:0006897	endocytosis
8	GO:0055083	monovalent inorganic anion homeostasis	2	0.96	GO:0055081	anion homeostasis
4	GO:0044283	small molecule biosynthetic process	7	0.95	GO:0009058, GO:0044281	biosynthetic process, small molecule metabolic process
8	GO:0050870	positive regulation of T cell activation	2	0.96	GO:0050863, GO:0042110, GO:0051251	regulation of T cell activation, T cell activation, positive regulation of lymphocyte activation
7	GO:0051222	positive regulation of protein transport	2	0.96	GO:0051050, GO:0015031, GO:0051223	positive regulation of transport, protein transport, regulation of protein transport
8	GO:0006402	mRNA catabolic process	2	0.96	GO:0016071, GO:0006401	mRNA metabolic process, RNA catabolic process
6	GO:0008038	neuron recognition	2	0.96	GO:0048666, GO:0008037	neuron development, cell recognition
9	GO:0000245	spliceosomal complex assembly	2	0.96	GO:0000398, GO:0022618	nuclear mRNA splicing, via spliceosome, ribonucleoprotein complex assembly
9	GO:0015758	glucose transport	2	0.96	GO:0008645	hexose transport
7	GO:0045922	negative regulation of fatty acid metabolic process	2	0.96	GO:0006631, GO:0019217, GO:0031324, GO:0045833	fatty acid metabolic process, regulation of fatty acid metabolic process, negative regulation of cellular metabolic process, negative regulation of lipid metabolic process
4	GO:0009308	amine metabolic process	4	0.95	GO:0006807	nitrogen compound metabolic process
6	GO:0019932	second-messenger-mediated signaling	2	0.96	GO:0035556	intracellular signal transduction
4	GO:0072593	reactive oxygen species metabolic process	2	0.96	GO:0044237	cellular metabolic process
8	GO:0014020	primary neural tube formation	2	0.96	GO:0001841, GO:0001838	neural tube formation, embryonic epithelial tube formation
7	GO:0042304	regulation of fatty acid biosynthetic process	2	0.96	GO:0019217, GO:0031326, GO:0006633, GO:0046890	regulation of fatty acid metabolic process, regulation of cellular biosynthetic process, fatty acid biosynthetic process, regulation of lipid biosynthetic process
4	GO:0020027	hemoglobin metabolic process	2	0.96	GO:0043170	macromolecule metabolic process
6	GO:0010470	regulation of gastrulation	2	0.96	GO:0007369, GO:0045995, GO:0022603	gastrulation, regulation of embryonic development, regulation of anatomical structure morphogenesis
5	GO:0021536	diencephalon development	2	0.96	GO:0030900, GO:0048856	forebrain development, anatomical structure development
7	GO:0030218	erythrocyte differentiation	2	0.96	GO:0030099, GO:0034101	myeloid cell differentiation, erythrocyte homeostasis
7	GO:0014009	glial cell proliferation	2	0.96	GO:0042063, GO:0008283	gliogenesis, cell proliferation
7	GO:0060606	tube closure	2	0.96	GO:0035148	tube formation
7	GO:0060191	regulation of lipase activity	2	0.96	GO:0051336	regulation of hydrolase activity
7	GO:0043502	regulation of muscle adaptation	2	0.96	GO:0043500, GO:0090257	muscle adaptation, regulation of muscle system process
6	GO:0048520	positive regulation of behavior	2	0.96	GO:0007610, GO:0050795, GO:0048584	behavior, regulation of behavior, positive regulation of response to stimulus
7	GO:0030520	intracellular estrogen receptor signaling pathway	2	0.96	GO:0030518	intracellular steroid hormone receptor signaling pathway
5	GO:0034976	response to endoplasmic reticulum stress	2	0.96	GO:0033554	cellular response to stress
7	GO:0090287	regulation of cellular response to growth factor stimulus	2	0.96	GO:0071363, GO:0050794, GO:0048583	cellular response to growth factor stimulus, regulation of cellular process, regulation of response to stimulus
6	GO:0006694	steroid biosynthetic process	2	0.96	GO:0008202, GO:0008610	steroid metabolic process, lipid biosynthetic process
5	GO:0010212	response to ionizing radiation	2	0.96	GO:0009314	response to radiation
6	GO:0003264	regulation of cardioblast proliferation	2	0.96	GO:0003156, GO:0003263, GO:0042127, GO:2000826	regulation of organ formation, cardioblast proliferation, regulation of cell proliferation, regulation of heart morphogenesis
5	GO:0000302	response to reactive oxygen species	2	0.96	GO:0010035, GO:0006979	response to inorganic substance, response to oxidative stress
8	GO:0034260	negative regulation of GTPase activity	2	0.96	GO:0051346, GO:0043087	negative regulation of hydrolase activity, regulation of GTPase activity
9	GO:0042490	mechanoreceptor differentiation	2	0.96	GO:0030182	neuron differentiation
6	GO:0070167	regulation of biomineral tissue development	2	0.96	GO:0031214, GO:2000026	biomineral tissue development, regulation of multicellular organismal development
8	GO:0031102	neuron projection regeneration	2	0.96	GO:0033554, GO:0048812, GO:0031099	cellular response to stress, neuron projection morphogenesis, regeneration
6	GO:0030002	cellular anion homeostasis	2	0.96	GO:0055081, GO:0006873	anion homeostasis, cellular ion homeostasis
8	GO:0060389	pathway-restricted SMAD protein phosphorylation	2	0.96	GO:0006468, GO:0007178	protein phosphorylation, transmembrane receptor protein serine/threonine kinase signaling pathway
8	GO:0007188	adenylate cyclase-modulating G-protein coupled receptor signaling pathway	2	0.96	GO:0007187	G-protein coupled receptor signaling pathway, coupled to cyclic nucleotide second messenger
6	GO:0010638	positive regulation of organelle organization	3	0.94	GO:0006996, GO:0048522, GO:0033043, GO:0051130	organelle organization, positive regulation of cellular process, regulation of organelle organization, positive regulation of cellular component organization
6	GO:0072522	purine-containing compound biosynthetic process	5	0.93	GO:0018130, GO:0044271, GO:0072521	heterocycle biosynthetic process, cellular nitrogen compound biosynthetic process, purine-containing compound metabolic process
7	GO:0046631	alpha-beta T cell activation	2	0.94	GO:0042110	T cell activation
5	GO:0043500	muscle adaptation	3	0.94	GO:0003012	muscle system process
6	GO:0032881	regulation of polysaccharide metabolic process	2	0.94	GO:0005976, GO:0006109, GO:0060255	polysaccharide metabolic process, regulation of carbohydrate metabolic process, regulation of macromolecule metabolic process
5	GO:0021511	spinal cord patterning	2	0.95	GO:0021510, GO:0003002	spinal cord development, regionalization
7	GO:0043270	positive regulation of ion transport	3	0.94	GO:0051050, GO:0043269, GO:0006811	positive regulation of transport, regulation of ion transport, ion transport
4	GO:0071216	cellular response to biotic stimulus	3	0.94	GO:0051716, GO:0009607	cellular response to stimulus, response to biotic stimulus
5	GO:0048872	homeostasis of number of cells	3	0.95	GO:0042592	homeostatic process
4	GO:0003014	renal system process	3	0.94	GO:0003008	system process
8	GO:0015872	dopamine transport	2	0.94	GO:0051937	catecholamine transport
8	GO:0048008	platelet-derived growth factor receptor signaling pathway	3	0.94	GO:0007169	transmembrane receptor protein tyrosine kinase signaling pathway
4	GO:0034440	lipid oxidation	3	0.94	GO:0030258, GO:0055114	lipid modification, oxidation-reduction process
5	GO:0022405	hair cycle process	2	0.94	GO:0022404, GO:0042633	molting cycle process, hair cycle
5	GO:0033993	response to lipid	3	0.94	GO:0010033	response to organic substance
5	GO:0032835	glomerulus development	2	0.91	GO:0072006, GO:0048856	nephron development, anatomical structure development
5	GO:0051188	cofactor biosynthetic process	4	0.92	GO:0051186, GO:0044249	cofactor metabolic process, cellular biosynthetic process
6	GO:0090257	regulation of muscle system process	4	0.92	GO:0044057, GO:0003012	regulation of system process, muscle system process
4	GO:0044262	cellular carbohydrate metabolic process	4	0.91	GO:0044237, GO:0005975	cellular metabolic process, carbohydrate metabolic process
7	GO:0061440	kidney vasculature development	2	0.91	GO:0061437, GO:0001822	renal system vasculature development, kidney development
6	GO:0050866	negative regulation of cell activation	4	0.89	GO:0050865, GO:0048523, GO:0001775	regulation of cell activation, negative regulation of cellular process, cell activation
4	GO:0006082	organic acid metabolic process	13	0.89	GO:0044237, GO:0044281	cellular metabolic process, small molecule metabolic process
6	GO:0071103	DNA conformation change	2	0.89	GO:0006259	DNA metabolic process
7	GO:0043487	regulation of RNA stability	4	0.86	GO:0010608, GO:0065008	posttranscriptional regulation of gene expression, regulation of biological quality
6	GO:0048017	inositol lipid-mediated signaling	4	0.86	GO:0035556	intracellular signal transduction
5	GO:0006650	glycerophospholipid metabolic process	3	0.85	GO:0006644, GO:0046486	phospholipid metabolic process, glycerolipid metabolic process
6	GO:0034660	ncRNA metabolic process	3	0.85	GO:0016070	RNA metabolic process
4	GO:0002274	myeloid leukocyte activation	2	0.85	GO:0045321	leukocyte activation
6	GO:0032507	maintenance of protein location in cell	3	0.85	GO:0051651, GO:0034613, GO:0045185	maintenance of location in cell, cellular protein localization, maintenance of protein location
3	GO:0071704	organic substance metabolic process	19	0.84	GO:0008152	metabolic process
7	GO:0031330	negative regulation of cellular catabolic process	2	0.82	GO:0009895, GO:0044248, GO:0031324, GO:0031329	negative regulation of catabolic process, cellular catabolic process, negative regulation of cellular metabolic process, regulation of cellular catabolic process
6	GO:0034329	cell junction assembly	2	0.82	GO:0034330, GO:0071844	cell junction organization, cellular component assembly at cellular level
6	GO:0048483	autonomic nervous system development	3	0.81	GO:0007399, GO:0048731	nervous system development, system development
6	GO:0061041	regulation of wound healing	2	0.82	GO:0080134, GO:0042060	regulation of response to stress, wound healing
6	GO:0051249	regulation of lymphocyte activation	4	0.82	GO:0046649, GO:0002694	lymphocyte activation, regulation of leukocyte activation
6	GO:0009855	determination of bilateral symmetry	2	0.82	GO:0009799	specification of symmetry
6	GO:0070507	regulation of microtubule cytoskeleton organization	2	0.82	GO:0032886, GO:0051493, GO:0000226	regulation of microtubule-based process, regulation of cytoskeleton organization, microtubule cytoskeleton organization
6	GO:0030856	regulation of epithelial cell differentiation	2	0.82	GO:0045595, GO:0030855, GO:2000026	regulation of cell differentiation, epithelial cell differentiation, regulation of multicellular organismal development
4	GO:0022900	electron transport chain	2	0.82	GO:0055114, GO:0006091	oxidation-reduction process, generation of precursor metabolites and energy
8	GO:0072007	mesangial cell differentiation	2	0.82	GO:0061005	cell differentiation involved in kidney development
5	GO:0015931	nucleobase-containing compound transport	5	0.82	GO:0006810	transport
6	GO:0051327	M phase of meiotic cell cycle	2	0.82	GO:0051321, GO:0000279	meiotic cell cycle, M phase
7	GO:0051608	histamine transport	2	0.82	GO:0015837	amine transport
5	GO:0060788	ectodermal placode formation	2	0.82	GO:0048646, GO:0071697	anatomical structure formation involved in morphogenesis, ectodermal placode morphogenesis
6	GO:0033238	regulation of cellular amine metabolic process	2	0.82	GO:0044106, GO:0051171, GO:0031323	cellular amine metabolic process, regulation of nitrogen compound metabolic process, regulation of cellular metabolic process
7	GO:0051053	negative regulation of DNA metabolic process	2	0.82	GO:0045934, GO:0051052, GO:0006259, GO:0010605	negative regulation of nucleobase-containing compound metabolic process, regulation of DNA metabolic process, DNA metabolic process, negative regulation of macromolecule metabolic process
5	GO:0003015	heart process	2	0.82	GO:0003013	circulatory system process
4	GO:0043647	inositol phosphate metabolic process	2	0.82	GO:0019637	organophosphate metabolic process
7	GO:0045619	regulation of lymphocyte differentiation	2	0.79	GO:0045595, GO:0051249, GO:2000026, GO:0030098	regulation of cell differentiation, regulation of lymphocyte activation, regulation of multicellular organismal development, lymphocyte differentiation
6	GO:0031646	positive regulation of neurological system process	3	0.79	GO:0031644, GO:0051240, GO:0050877	regulation of neurological system process, positive regulation of multicellular organismal process, neurological system process
6	GO:0042770	signal transduction in response to DNA damage	2	0.79	GO:0006974, GO:0035556	response to DNA damage stimulus, intracellular signal transduction
5	GO:0031099	regeneration	3	0.79	GO:0009653	anatomical structure morphogenesis
6	GO:0030832	regulation of actin filament length	2	0.79	GO:0032956, GO:0032535	regulation of actin cytoskeleton organization, regulation of cellular component size
7	GO:0051250	negative regulation of lymphocyte activation	3	0.79	GO:0051249, GO:0046649, GO:0002695	regulation of lymphocyte activation, lymphocyte activation, negative regulation of leukocyte activation
8	GO:0010950	positive regulation of endopeptidase activity	3	0.79	GO:0052548, GO:0010952	regulation of endopeptidase activity, positive regulation of peptidase activity
6	GO:0042089	cytokine biosynthetic process	3	0.79	GO:0001816, GO:0042107	cytokine production, cytokine metabolic process
5	GO:0034654	nucleobase-containing compound biosynthetic process	6	0.78	GO:0044271, GO:0006139	cellular nitrogen compound biosynthetic process, nucleobase-containing compound metabolic process
7	GO:0051937	catecholamine transport	2	0.78	GO:0015844, GO:0015850	monoamine transport, organic alcohol transport
8	GO:0009123	nucleoside monophosphate metabolic process	5	0.78	GO:0009117	nucleotide metabolic process
7	GO:0072210	metanephric nephron development	2	0.78	GO:0072006, GO:0001656	nephron development, metanephros development
7	GO:0007259	JAK-STAT cascade	3	0.75	GO:0007243	intracellular protein kinase cascade
7	GO:0051348	negative regulation of transferase activity	4	0.75	GO:0051338, GO:0043086	regulation of transferase activity, negative regulation of catalytic activity
4	GO:0050886	endocrine process	2	0.73	GO:0003008	system process
5	GO:0006732	coenzyme metabolic process	4	0.73	GO:0051186	cofactor metabolic process
4	GO:0051235	maintenance of location	4	0.74	GO:0065008, GO:0051179	regulation of biological quality, localization
7	GO:0070588	calcium ion transmembrane transport	2	0.72	GO:0034220, GO:0006816	ion transmembrane transport, calcium ion transport
7	GO:0050432	catecholamine secretion	2	0.72	GO:0051937, GO:0032940	catecholamine transport, secretion by cell
7	GO:0006140	regulation of nucleotide metabolic process	7	0.73	GO:0009117, GO:0019219	nucleotide metabolic process, regulation of nucleobase-containing compound metabolic process
6	GO:0045446	endothelial cell differentiation	2	0.72	GO:0003158, GO:0030855	endothelium development, epithelial cell differentiation
6	GO:0010810	regulation of cell-substrate adhesion	2	0.72	GO:0030155, GO:0031589	regulation of cell adhesion, cell-substrate adhesion
8	GO:0031056	regulation of histone modification	2	0.72	GO:0016570, GO:0031399, GO:0033044	histone modification, regulation of protein modification process, regulation of chromosome organization
6	GO:0070925	organelle assembly	2	0.72	GO:0006996, GO:0071844	organelle organization, cellular component assembly at cellular level
3	GO:0048144	fibroblast proliferation	2	0.72	GO:0008283	cell proliferation
7	GO:0014848	urinary tract smooth muscle contraction	2	0.72	GO:0006939	smooth muscle contraction
10	GO:0018393	internal peptidyl-lysine acetylation	2	0.72	GO:0006475, GO:0018394	internal protein amino acid acetylation, peptidyl-lysine acetylation
6	GO:0014888	striated muscle adaptation	2	0.72	GO:0043500	muscle adaptation
5	GO:0002831	regulation of response to biotic stimulus	2	0.72	GO:0009607, GO:0048583	response to biotic stimulus, regulation of response to stimulus
8	GO:0055067	monovalent inorganic cation homeostasis	2	0.72	GO:0055080	cation homeostasis
4	GO:0043900	regulation of multi-organism process	2	0.72	GO:0050789, GO:0051704	regulation of biological process, multi-organism process
7	GO:0032107	regulation of response to nutrient levels	2	0.72	GO:0031667, GO:0032104	response to nutrient levels, regulation of response to extracellular stimulus
5	GO:0019058	viral infectious cycle	2	0.72	GO:0022415	viral reproductive process
6	GO:0030705	cytoskeleton-dependent intracellular transport	2	0.72	GO:0046907	intracellular transport
10	GO:0042503	tyrosine phosphorylation of Stat3 protein	2	0.72	GO:0007260	tyrosine phosphorylation of STAT protein
5	GO:0051340	regulation of ligase activity	2	0.72	GO:0050790	regulation of catalytic activity
8	GO:0050868	negative regulation of T cell activation	2	0.72	GO:0050863, GO:0051250, GO:0042110	regulation of T cell activation, negative regulation of lymphocyte activation, T cell activation
9	GO:0050684	regulation of mRNA processing	2	0.72	GO:0051252, GO:0010468, GO:0006397	regulation of RNA metabolic process, regulation of gene expression, mRNA processing
7	GO:0032069	regulation of nuclease activity	2	0.72	GO:0051336	regulation of hydrolase activity
4	GO:0097006	regulation of plasma lipoprotein particle levels	2	0.72	GO:0050789	regulation of biological process
5	GO:0072132	mesenchyme morphogenesis	2	0.73	GO:0009887, GO:0060485, GO:0048729	organ morphogenesis, mesenchyme development, tissue morphogenesis
8	GO:0035303	regulation of dephosphorylation	2	0.72	GO:0016311, GO:0019220	dephosphorylation, regulation of phosphate metabolic process
4	GO:0051607	defense response to virus	2	0.72	GO:0002252, GO:0006952, GO:0009615	immune effector process, defense response, response to virus
6	GO:0060326	cell chemotaxis	2	0.72	GO:0016477, GO:0070887, GO:0006935	cell migration, cellular response to chemical stimulus, chemotaxis
6	GO:0051145	smooth muscle cell differentiation	2	0.72	GO:0042692	muscle cell differentiation
5	GO:0002697	regulation of immune effector process	2	0.72	GO:0002682, GO:0002252	regulation of immune system process, immune effector process
8	GO:0032885	regulation of polysaccharide biosynthetic process	2	0.72	GO:0000271, GO:0043255, GO:0010556, GO:0032881	polysaccharide biosynthetic process, regulation of carbohydrate biosynthetic process, regulation of macromolecule biosynthetic process, regulation of polysaccharide metabolic process
8	GO:0032373	positive regulation of sterol transport	2	0.72	GO:0015918, GO:0032371, GO:0032370	sterol transport, regulation of sterol transport, positive regulation of lipid transport
4	GO:0010243	response to organic nitrogen	4	0.73	GO:0010033, GO:0009719	response to organic substance, response to endogenous stimulus
6	GO:0007051	spindle organization	2	0.72	GO:0000226, GO:0000279	microtubule cytoskeleton organization, M phase
8	GO:0070304	positive regulation of stress-activated protein kinase signaling cascade	2	0.72	GO:0070302, GO:0031098, GO:0010740	regulation of stress-activated protein kinase signaling cascade, stress-activated protein kinase signaling cascade, positive regulation of intracellular protein kinase cascade
10	GO:0060401	cytosolic calcium ion transport	2	0.73	GO:0006816	calcium ion transport
7	GO:0032106	positive regulation of response to extracellular stimulus	2	0.72	GO:0009991, GO:0032103, GO:0032104	response to extracellular stimulus, positive regulation of response to external stimulus, regulation of response to extracellular stimulus
9	GO:0043484	regulation of RNA splicing	2	0.72	GO:0051252, GO:0010468, GO:0008380	regulation of RNA metabolic process, regulation of gene expression, RNA splicing
10	GO:0045685	regulation of glial cell differentiation	2	0.72	GO:0010001, GO:0014013	glial cell differentiation, regulation of gliogenesis
3	GO:0033555	multicellular organismal response to stress	2	0.72	GO:0032501, GO:0006950	multicellular organismal process, response to stress
5	GO:0044271	cellular nitrogen compound biosynthetic process	8	0.72	GO:0044249, GO:0034641	cellular biosynthetic process, cellular nitrogen compound metabolic process
7	GO:0014909	smooth muscle cell migration	2	0.72	GO:0014812	muscle cell migration
7	GO:0022898	regulation of transmembrane transporter activity	2	0.72	GO:0032409, GO:0034762	regulation of transporter activity, regulation of transmembrane transport
6	GO:0048708	astrocyte differentiation	2	0.72	GO:0007417, GO:0010001	central nervous system development, glial cell differentiation
5	GO:0008652	cellular amino acid biosynthetic process	2	0.72	GO:0006520, GO:0046394	cellular amino acid metabolic process, carboxylic acid biosynthetic process
6	GO:0016236	macroautophagy	2	0.72	GO:0009267, GO:0006914	cellular response to starvation, autophagy
7	GO:0010506	regulation of autophagy	2	0.72	GO:0006914, GO:0031329	autophagy, regulation of cellular catabolic process
7	GO:0009125	nucleoside monophosphate catabolic process	2	0.72	GO:0009123, GO:0009166	nucleoside monophosphate metabolic process, nucleotide catabolic process
6	GO:0007292	female gamete generation	3	0.71	GO:0007276	gamete generation
6	GO:0090183	regulation of kidney development	2	0.71	GO:0001822, GO:2000026	kidney development, regulation of multicellular organismal development
6	GO:0006576	cellular biogenic amine metabolic process	2	0.71	GO:0044106	cellular amine metabolic process
5	GO:0022613	ribonucleoprotein complex biogenesis	3	0.71	GO:0071843	cellular component biogenesis at cellular level
3	GO:0034330	cell junction organization	3	0.71	GO:0016043, GO:0009987	cellular component organization, cellular process
6	GO:0060914	heart formation	2	0.71	GO:0003007, GO:0048645	heart morphogenesis, organ formation
8	GO:0006473	protein acetylation	3	0.71	GO:0043543	protein acylation
5	GO:0071705	nitrogen compound transport	4	0.71	GO:0006810	transport
6	GO:0009712	catechol-containing compound metabolic process	2	0.71	GO:0018958, GO:0034311	phenol-containing compound metabolic process, diol metabolic process
6	GO:0070201	regulation of establishment of protein localization	5	0.68	GO:0045184, GO:0032880	establishment of protein localization, regulation of protein localization
6	GO:0021915	neural tube development	3	0.69	GO:0007399, GO:0043009, GO:0048856	nervous system development, chordate embryonic development, anatomical structure development
5	GO:0018130	heterocycle biosynthetic process	6	0.69	GO:0046483, GO:0044249	heterocycle metabolic process, cellular biosynthetic process
7	GO:0052547	regulation of peptidase activity	5	0.67	GO:0051336	regulation of hydrolase activity
7	GO:0015844	monoamine transport	2	0.68	GO:0015837	amine transport
3	GO:0048871	multicellular organismal homeostasis	2	0.68	GO:0042592, GO:0032501	homeostatic process, multicellular organismal process
7	GO:0032371	regulation of sterol transport	3	0.65	GO:0032368, GO:0015918	regulation of lipid transport, sterol transport
6	GO:0031670	cellular response to nutrient	3	0.65	GO:0007584, GO:0070887, GO:0031669	response to nutrient, cellular response to chemical stimulus, cellular response to nutrient levels
4	GO:0051186	cofactor metabolic process	5	0.66	GO:0044237	cellular metabolic process
9	GO:0007260	tyrosine phosphorylation of STAT protein	2	0.65	GO:0018108, GO:0007259	peptidyl-tyrosine phosphorylation, JAK-STAT cascade
8	GO:0010466	negative regulation of peptidase activity	3	0.65	GO:0052547, GO:0051346	regulation of peptidase activity, negative regulation of hydrolase activity
6	GO:0045088	regulation of innate immune response	3	0.62	GO:0045087, GO:0050776, GO:0031347	innate immune response, regulation of immune response, regulation of defense response
6	GO:0031349	positive regulation of defense response	3	0.62	GO:0006952, GO:0048584, GO:0031347	defense response, positive regulation of response to stimulus, regulation of defense response
7	GO:0030811	regulation of nucleotide catabolic process	5	0.63	GO:0006140, GO:0031329, GO:0009166	regulation of nucleotide metabolic process, regulation of cellular catabolic process, nucleotide catabolic process
6	GO:0001838	embryonic epithelial tube formation	3	0.6	GO:0016331, GO:0072175	morphogenesis of embryonic epithelium, epithelial tube formation
7	GO:0030808	regulation of nucleotide biosynthetic process	3	0.59	GO:0006140, GO:0031326, GO:0009165	regulation of nucleotide metabolic process, regulation of cellular biosynthetic process, nucleotide biosynthetic process
9	GO:0030799	regulation of cyclic nucleotide metabolic process	3	0.59	GO:0006140, GO:0009187	regulation of nucleotide metabolic process, cyclic nucleotide metabolic process
8	GO:0009190	cyclic nucleotide biosynthetic process	3	0.59	GO:0009187, GO:0009124	cyclic nucleotide metabolic process, nucleoside monophosphate biosynthetic process
8	GO:0045981	positive regulation of nucleotide metabolic process	3	0.59	GO:0006140, GO:0045935, GO:0009117	regulation of nucleotide metabolic process, positive regulation of nucleobase-containing compound metabolic process, nucleotide metabolic process
3	GO:0008037	cell recognition	2	0.58	GO:0032501, GO:0009987	multicellular organismal process, cellular process
6	GO:0001704	formation of primary germ layer	2	0.58	GO:0048646, GO:0007369	anatomical structure formation involved in morphogenesis, gastrulation
7	GO:0001841	neural tube formation	2	0.58	GO:0021915, GO:0001838	neural tube development, embryonic epithelial tube formation
6	GO:0045995	regulation of embryonic development	2	0.58	GO:0009790, GO:2000026	embryo development, regulation of multicellular organismal development
7	GO:0072594	establishment of protein localization to organelle	2	0.58	GO:0045184, GO:0033365	establishment of protein localization, protein localization to organelle
6	GO:0044242	cellular lipid catabolic process	2	0.58	GO:0044248, GO:0044255, GO:0016042	cellular catabolic process, cellular lipid metabolic process, lipid catabolic process
6	GO:0008207	C21-steroid hormone metabolic process	2	0.58	GO:0008202, GO:0034754	steroid metabolic process, cellular hormone metabolic process
7	GO:0003156	regulation of organ formation	2	0.58	GO:0048645, GO:2000027	organ formation, regulation of organ morphogenesis
3	GO:0022415	viral reproductive process	2	0.58	GO:0016032, GO:0022414	viral reproduction, reproductive process
7	GO:2000826	regulation of heart morphogenesis	2	0.58	GO:2000027, GO:0003007	regulation of organ morphogenesis, heart morphogenesis
6	GO:0006401	RNA catabolic process	2	0.58	GO:0016070, GO:0044265	RNA metabolic process, cellular macromolecule catabolic process
3	GO:0051606	detection of stimulus	2	0.58	GO:0050896	response to stimulus
6	GO:0003263	cardioblast proliferation	2	0.58	GO:0008283, GO:0060914	cell proliferation, heart formation
7	GO:0007187	G-protein coupled receptor signaling pathway, coupled to cyclic nucleotide second messenger	2	0.58	GO:0007186	G-protein coupled receptor signaling pathway
7	GO:0006937	regulation of muscle contraction	2	0.58	GO:0006936, GO:0090257	muscle contraction, regulation of muscle system process
7	GO:0070585	protein localization in mitochondrion	2	0.58	GO:0033365	protein localization to organelle
7	GO:0055081	anion homeostasis	2	0.58	GO:0050801	ion homeostasis
5	GO:0021532	neural tube patterning	2	0.58	GO:0021915, GO:0003002	neural tube development, regionalization
6	GO:0021783	preganglionic parasympathetic nervous system development	2	0.58	GO:0007417, GO:0048486, GO:0048731	central nervous system development, parasympathetic nervous system development, system development
5	GO:0035384	thioester biosynthetic process	2	0.58	GO:0035383, GO:0044249	thioester metabolic process, cellular biosynthetic process
7	GO:0034763	negative regulation of transmembrane transport	2	0.58	GO:0048523, GO:0055085, GO:0034762, GO:0051051	negative regulation of cellular process, transmembrane transport, regulation of transmembrane transport, negative regulation of transport
5	GO:0006637	acyl-CoA metabolic process	2	0.58	GO:0006732, GO:0035383	coenzyme metabolic process, thioester metabolic process
7	GO:0051224	negative regulation of protein transport	2	0.58	GO:0015031, GO:0051223, GO:0051051	protein transport, regulation of protein transport, negative regulation of transport
7	GO:2000021	regulation of ion homeostasis	2	0.58	GO:0032844, GO:0050801	regulation of homeostatic process, ion homeostasis
7	GO:0022618	ribonucleoprotein complex assembly	2	0.58	GO:0022613, GO:0071826, GO:0034622	ribonucleoprotein complex biogenesis, ribonucleoprotein complex subunit organization, cellular macromolecular complex assembly
7	GO:0051251	positive regulation of lymphocyte activation	2	0.58	GO:0046649, GO:0051249, GO:0002696	lymphocyte activation, regulation of lymphocyte activation, positive regulation of leukocyte activation
8	GO:0046823	negative regulation of nucleocytoplasmic transport	2	0.58	GO:0046822, GO:0032387, GO:0006913	regulation of nucleocytoplasmic transport, negative regulation of intracellular transport, nucleocytoplasmic transport
8	GO:0090317	negative regulation of intracellular protein transport	2	0.58	GO:0032387, GO:0033157, GO:0006886, GO:0051224	negative regulation of intracellular transport, regulation of intracellular protein transport, intracellular protein transport, negative regulation of protein transport
8	GO:0008645	hexose transport	2	0.58	GO:0015749	monosaccharide transport
4	GO:0042633	hair cycle	2	0.56	GO:0042303	molting cycle
4	GO:0022404	molting cycle process	2	0.56	GO:0042303	molting cycle
4	GO:0016042	lipid catabolic process	3	0.56	GO:0006629, GO:0009056	lipid metabolic process, catabolic process
6	GO:2000027	regulation of organ morphogenesis	3	0.56	GO:0009887, GO:0022603, GO:2000026	organ morphogenesis, regulation of anatomical structure morphogenesis, regulation of multicellular organismal development
6	GO:0061437	renal system vasculature development	2	0.55	GO:0001944, GO:0072001	vasculature development, renal system development
4	GO:0051651	maintenance of location in cell	3	0.51	GO:0051235, GO:0051641, GO:0009987	maintenance of location, cellular localization, cellular process
3	GO:0002252	immune effector process	3	0.51	GO:0002376	immune system process
5	GO:0009799	specification of symmetry	2	0.49	GO:0007389	pattern specification process
6	GO:0009895	negative regulation of catabolic process	2	0.49	GO:0009056, GO:0009894, GO:0009892	catabolic process, regulation of catabolic process, negative regulation of metabolic process
5	GO:0051321	meiotic cell cycle	2	0.49	GO:0048610, GO:0007049	cellular process involved in reproduction, cell cycle
4	GO:1901137	carbohydrate derivative biosynthetic process	2	0.49	GO:1901135, GO:0009058	carbohydrate derivative metabolic process, biosynthetic process
5	GO:0071697	ectodermal placode morphogenesis	2	0.49	GO:0071696, GO:0009653	ectodermal placode development, anatomical structure morphogenesis
5	GO:0032886	regulation of microtubule-based process	2	0.49	GO:0007017, GO:0050794	microtubule-based process, regulation of cellular process
6	GO:0007270	neuron-neuron synaptic transmission	2	0.49	GO:0007268	synaptic transmission
6	GO:0045017	glycerolipid biosynthetic process	2	0.49	GO:0008610, GO:0046486, GO:0044249	lipid biosynthetic process, glycerolipid metabolic process, cellular biosynthetic process
6	GO:0002695	negative regulation of leukocyte activation	3	0.48	GO:0045321, GO:0050866, GO:0002683, GO:0002694	leukocyte activation, negative regulation of cell activation, negative regulation of immune system process, regulation of leukocyte activation
6	GO:0032956	regulation of actin cytoskeleton organization	2	0.48	GO:0032970, GO:0030036, GO:0051493	regulation of actin filament-based process, actin cytoskeleton organization, regulation of cytoskeleton organization
8	GO:0010952	positive regulation of peptidase activity	3	0.48	GO:0052547, GO:0051345	regulation of peptidase activity, positive regulation of hydrolase activity
5	GO:0042107	cytokine metabolic process	3	0.48	GO:0019538	protein metabolic process
6	GO:0015850	organic alcohol transport	2	0.47	GO:0071702	organic substance transport
4	GO:0016051	carbohydrate biosynthetic process	4	0.47	GO:0009058, GO:0005975	biosynthetic process, carbohydrate metabolic process
9	GO:0006475	internal protein amino acid acetylation	2	0.43	GO:0006473	protein acetylation
4	GO:0009615	response to virus	2	0.43	GO:0051707	response to other organism
6	GO:0014812	muscle cell migration	2	0.43	GO:0016477	cell migration
7	GO:0033044	regulation of chromosome organization	2	0.43	GO:0051276, GO:0033043	chromosome organization, regulation of organelle organization
7	GO:0043543	protein acylation	3	0.42	GO:0006464	cellular protein modification process
5	GO:0006914	autophagy	2	0.43	GO:0044248	cellular catabolic process
5	GO:0044106	cellular amine metabolic process	2	0.42	GO:0034641, GO:0009308	cellular nitrogen compound metabolic process, amine metabolic process
7	GO:0071887	leukocyte apoptotic process	2	0.43	GO:0097285	cell-type specific apoptotic process
5	GO:0034311	diol metabolic process	2	0.42	GO:0006066	alcohol metabolic process
7	GO:0032370	positive regulation of lipid transport	2	0.43	GO:0006869, GO:0051050, GO:0032368	lipid transport, positive regulation of transport, regulation of lipid transport
5	GO:0003158	endothelium development	2	0.43	GO:0009888	tissue development
4	GO:0071843	cellular component biogenesis at cellular level	3	0.42	GO:0071841, GO:0044085	cellular component organization or biogenesis at cellular level, cellular component biogenesis
5	GO:0018958	phenol-containing compound metabolic process	2	0.42	GO:0006725	cellular aromatic compound metabolic process
6	GO:0032104	regulation of response to extracellular stimulus	2	0.43	GO:0009991, GO:0032101	response to extracellular stimulus, regulation of response to external stimulus
7	GO:0021795	cerebral cortex cell migration	2	0.44	GO:0021987, GO:0022029	cerebral cortex development, telencephalon cell migration
6	GO:0032368	regulation of lipid transport	3	0.39	GO:0051049, GO:0006869	regulation of transport, lipid transport
6	GO:0016331	morphogenesis of embryonic epithelium	3	0.36	GO:0002009, GO:0048598	morphogenesis of an epithelium, embryonic morphogenesis
6	GO:0072175	epithelial tube formation	3	0.36	GO:0060562, GO:0035148	epithelial tube morphogenesis, tube formation
6	GO:0002696	positive regulation of leukocyte activation	2	0.35	GO:0045321, GO:0050867, GO:0002694, GO:0002684	leukocyte activation, positive regulation of cell activation, regulation of leukocyte activation, positive regulation of immune system process
7	GO:0015749	monosaccharide transport	2	0.35	GO:0008643	carbohydrate transport
7	GO:0009124	nucleoside monophosphate biosynthetic process	3	0.35	GO:0009165, GO:0009123	nucleotide biosynthetic process, nucleoside monophosphate metabolic process
4	GO:0035383	thioester metabolic process	2	0.35	GO:0044237	cellular metabolic process
7	GO:0032387	negative regulation of intracellular transport	2	0.35	GO:0051051, GO:0032386, GO:0046907	negative regulation of transport, regulation of intracellular transport, intracellular transport
3	GO:0042303	molting cycle	2	0.34	GO:0032501	multicellular organismal process
5	GO:0071826	ribonucleoprotein complex subunit organization	2	0.35	GO:0043933	macromolecular complex subunit organization
6	GO:0048486	parasympathetic nervous system development	2	0.35	GO:0048731, GO:0048483	system development, autonomic nervous system development
7	GO:0003073	regulation of systemic arterial blood pressure	2	0.35	GO:0008217	regulation of blood pressure
4	GO:0034754	cellular hormone metabolic process	2	0.35	GO:0044237, GO:0042445	cellular metabolic process, hormone metabolic process
5	GO:0032970	regulation of actin filament-based process	2	0.29	GO:0050794, GO:0030029	regulation of cellular process, actin filament-based process
4	GO:0071696	ectodermal placode development	2	0.29	GO:0048856	anatomical structure development
7	GO:0022029	telencephalon cell migration	2	0.26	GO:0021885, GO:0021537	forebrain cell migration, telencephalon development
4	GO:0005976	polysaccharide metabolic process	2	0.25	GO:0043170, GO:0005975	macromolecule metabolic process, carbohydrate metabolic process
5	GO:0035148	tube formation	3	0.22	GO:0048646, GO:0035239	anatomical structure formation involved in morphogenesis, tube morphogenesis
3	GO:0042445	hormone metabolic process	2	0.21	GO:0010817, GO:0008152	regulation of hormone levels, metabolic process
6	GO:0050867	positive regulation of cell activation	2	0.21	GO:0050865, GO:0048522, GO:0001775	regulation of cell activation, positive regulation of cellular process, cell activation
6	GO:0000271	polysaccharide biosynthetic process	2	0.21	GO:0005976, GO:0016051, GO:0009059	polysaccharide metabolic process, carbohydrate biosynthetic process, macromolecule biosynthetic process
4	GO:0016052	carbohydrate catabolic process	2	0.21	GO:0005975, GO:0009056	carbohydrate metabolic process, catabolic process
6	GO:0008643	carbohydrate transport	2	0.21	GO:0071702	organic substance transport
6	GO:0021885	forebrain cell migration	2	0.16	GO:0030900, GO:0016477	forebrain development, cell migration

## Sheet: cellular_component
LevelGO	Term(Acc)	Term(Name)	#Seq	Score	Parents(Acc)	Parents(Name)
3	GO:0044464	cell part	190	105.3	GO:0005623, GO:0005575	cell, cellular_component
5	GO:0005737	cytoplasm	129	90.45	GO:0044424	intracellular part
4	GO:0044424	intracellular part	171	87.68	GO:0044464, GO:0005622	cell part, intracellular
1	GO:0005575	cellular_component	201	82.84
5	GO:0044444	cytoplasmic part	87	81.41	GO:0005737, GO:0044424	cytoplasm, intracellular part
7	GO:0005634	nucleus	111	78.92	GO:0043231	intracellular membrane-bounded organelle
6	GO:0043231	intracellular membrane-bounded organelle	144	76.8	GO:0043229, GO:0043227	intracellular organelle, membrane-bounded organelle
2	GO:0005623	cell	190	65.18	GO:0005575	cellular_component
5	GO:0043229	intracellular organelle	154	62.49	GO:0043226, GO:0044424	organelle, intracellular part
4	GO:0005622	intracellular	175	57.61	GO:0044464	cell part
6	GO:0044428	nuclear part	65	54.26	GO:0005634, GO:0044446	nucleus, intracellular organelle part
4	GO:0044446	intracellular organelle part	100	53.45	GO:0044422, GO:0043229, GO:0044424	organelle part, intracellular organelle, intracellular part
6	GO:0005829	cytosol	48	48	GO:0044444	cytoplasmic part
3	GO:0043227	membrane-bounded organelle	144	47.73	GO:0043226	organelle
2	GO:0016020	membrane	77	40.83	GO:0005575	cellular_component
2	GO:0043226	organelle	154	38.13	GO:0005575	cellular_component
6	GO:0043232	intracellular non-membrane-bounded organelle	67	37.65	GO:0043229, GO:0043228	intracellular organelle, non-membrane-bounded organelle
7	GO:0031981	nuclear lumen	59	36.97	GO:0044428, GO:0070013	nuclear part, intracellular organelle lumen
3	GO:0043234	protein complex	52	34.95	GO:0032991	macromolecular complex
4	GO:0005886	plasma membrane	47	34.04	GO:0071944, GO:0016020	cell periphery, membrane
3	GO:0044422	organelle part	100	33.34	GO:0005575, GO:0043226	cellular_component, organelle
2	GO:0032991	macromolecular complex	62	29.54	GO:0005575	cellular_component
6	GO:0005730	nucleolus	28	28	GO:0044428, GO:0031981, GO:0043232	nuclear part, nuclear lumen, intracellular non-membrane-bounded organelle
6	GO:0005654	nucleoplasm	40	27.28	GO:0044428, GO:0031981	nuclear part, nuclear lumen
3	GO:0044425	membrane part	52	25.14	GO:0005575, GO:0016020	cellular_component, membrane
6	GO:0070013	intracellular organelle lumen	62	24.1	GO:0044446, GO:0043233	intracellular organelle part, organelle lumen
4	GO:0071944	cell periphery	49	23.64	GO:0044464	cell part
3	GO:0043228	non-membrane-bounded organelle	67	22.59	GO:0043226	organelle
6	GO:0005624	membrane fraction	25	21.28	GO:0005626	insoluble fraction
5	GO:0016021	integral to membrane	28	20.73	GO:0031224	intrinsic to membrane
4	GO:0000267	cell fraction	35	17.46	GO:0044464	cell part
4	GO:0031090	organelle membrane	33	16.08	GO:0044422, GO:0016020, GO:0043227	organelle part, membrane, membrane-bounded organelle
4	GO:0044459	plasma membrane part	23	15.73	GO:0005886, GO:0044425	plasma membrane, membrane part
4	GO:0042995	cell projection	29	15.08	GO:0044464	cell part
4	GO:0012505	endomembrane system	29	14.95	GO:0044464	cell part
7	GO:0005856	cytoskeleton	26	14.81	GO:0043232	intracellular non-membrane-bounded organelle
4	GO:0043233	organelle lumen	62	14.59	GO:0044422, GO:0031974	organelle part, membrane-enclosed lumen
5	GO:0030529	ribonucleoprotein complex	16	14.08	GO:0032991, GO:0044424	macromolecular complex, intracellular part
6	GO:0044451	nucleoplasm part	21	13.8	GO:0044428, GO:0005654	nuclear part, nucleoplasm
4	GO:0031224	intrinsic to membrane	30	13.4	GO:0044425	membrane part
5	GO:0005625	soluble fraction	13	13	GO:0000267	cell fraction
5	GO:0005626	insoluble fraction	25	12.77	GO:0000267	cell fraction
6	GO:0005794	Golgi apparatus	19	12.61	GO:0044444, GO:0043231	cytoplasmic part, intracellular membrane-bounded organelle
5	GO:0043005	neuron projection	19	11.71	GO:0042995	cell projection
6	GO:0005783	endoplasmic reticulum	20	11.58	GO:0044444, GO:0043231	cytoplasmic part, intracellular membrane-bounded organelle
6	GO:0005739	mitochondrion	13	10.73	GO:0044444, GO:0043231	cytoplasmic part, intracellular membrane-bounded organelle
4	GO:0005615	extracellular space	12	10.54	GO:0044421	extracellular region part
5	GO:0043025	neuronal cell body	11	10.2	GO:0044297	cell body
8	GO:0005667	transcription factor complex	10	10	GO:0044451, GO:0043234	nucleoplasm part, protein complex
7	GO:0000785	chromatin	12	9.48	GO:0044427	chromosomal part
2	GO:0005576	extracellular region	22	9.37	GO:0005575	cellular_component
6	GO:0044427	chromosomal part	16	9.31	GO:0044446, GO:0005694	intracellular organelle part, chromosome
6	GO:0048471	perinuclear region of cytoplasm	9	9	GO:0044444	cytoplasmic part
2	GO:0031974	membrane-enclosed lumen	63	8.97	GO:0005575	cellular_component
3	GO:0044421	extracellular region part	18	8.94	GO:0005575, GO:0005576	cellular_component, extracellular region
3	GO:0044456	synapse part	11	8.86	GO:0005575, GO:0045202	cellular_component, synapse
4	GO:0009986	cell surface	9	8.6	GO:0044464	cell part
2	GO:0030054	cell junction	16	7.76	GO:0005575	cellular_component
6	GO:0044430	cytoskeletal part	13	7.68	GO:0044446, GO:0005856	intracellular organelle part, cytoskeleton
7	GO:0016023	cytoplasmic membrane-bounded vesicle	14	7.66	GO:0031410, GO:0043231, GO:0031988	cytoplasmic vesicle, intracellular membrane-bounded organelle, membrane-bounded vesicle
4	GO:0000139	Golgi membrane	9	7.43	GO:0044431, GO:0031090, GO:0012505	Golgi apparatus part, organelle membrane, endomembrane system
4	GO:0044463	cell projection part	15	7.18	GO:0044464, GO:0042995	cell part, cell projection
8	GO:0015630	microtubule cytoskeleton	11	6.92	GO:0005856	cytoskeleton
6	GO:0030425	dendrite	9	6.85	GO:0043005	neuron projection
4	GO:0042175	nuclear outer membrane-endoplasmic reticulum membrane network	12	6.81	GO:0016020, GO:0044425, GO:0012505	membrane, membrane part, endomembrane system
4	GO:0005789	endoplasmic reticulum membrane	9	6.68	GO:0044432, GO:0031090, GO:0044425, GO:0042175	endoplasmic reticulum part, organelle membrane, membrane part, nuclear outer membrane-endoplasmic reticulum membrane network
2	GO:0045202	synapse	11	6.51	GO:0005575	cellular_component
7	GO:0005694	chromosome	16	6.19	GO:0043232	intracellular non-membrane-bounded organelle
4	GO:0044297	cell body	11	6.12	GO:0044464	cell part
6	GO:0044431	Golgi apparatus part	10	6.02	GO:0044446, GO:0044444, GO:0005794	intracellular organelle part, cytoplasmic part, Golgi apparatus
7	GO:0019717	synaptosome	6	6	GO:0005624	membrane fraction
4	GO:0016324	apical plasma membrane	6	6	GO:0045177, GO:0044459	apical part of cell, plasma membrane part
6	GO:0031410	cytoplasmic vesicle	15	5.91	GO:0044444, GO:0031982, GO:0043229	cytoplasmic part, vesicle, intracellular organelle
6	GO:0016323	basolateral plasma membrane	9	5.86	GO:0044459	plasma membrane part
6	GO:0044432	endoplasmic reticulum part	11	5.64	GO:0044446, GO:0044444, GO:0005783	intracellular organelle part, cytoplasmic part, endoplasmic reticulum
4	GO:0045177	apical part of cell	8	5.6	GO:0044464	cell part
8	GO:0015629	actin cytoskeleton	6	5.36	GO:0005856	cytoskeleton
5	GO:0005635	nuclear envelope	9	5.37	GO:0044428, GO:0031967, GO:0012505	nuclear part, organelle envelope, endomembrane system
5	GO:0005938	cell cortex	6	5.36	GO:0044444, GO:0071944	cytoplasmic part, cell periphery
4	GO:0031988	membrane-bounded vesicle	14	5.2	GO:0031982	vesicle
8	GO:0030665	clathrin coated vesicle membrane	4	5.14	GO:0030662, GO:0030136	coated vesicle membrane, clathrin-coated vesicle
3	GO:0005911	cell-cell junction	8	5.04	GO:0030054	cell junction
6	GO:0016363	nuclear matrix	5	5	GO:0044428, GO:0034399	nuclear part, nuclear periphery
7	GO:0000932	cytoplasmic mRNA processing body	5	5	GO:0035770	ribonucleoprotein granule
6	GO:0030424	axon	9	4.86	GO:0043005	neuron projection
4	GO:0005604	basement membrane	5	4.6	GO:0044420, GO:0005578	extracellular matrix part, proteinaceous extracellular matrix
9	GO:0030136	clathrin-coated vesicle	7	4.59	GO:0030135	coated vesicle
6	GO:0044454	nuclear chromosome part	8	4.56	GO:0044428, GO:0000228, GO:0044427	nuclear part, nuclear chromosome, chromosomal part
4	GO:0031967	organelle envelope	13	4.52	GO:0044446, GO:0031975, GO:0043227	intracellular organelle part, envelope, membrane-bounded organelle
6	GO:0005681	spliceosomal complex	6	4.4	GO:0030529, GO:0044428	ribonucleoprotein complex, nuclear part
7	GO:0005815	microtubule organizing center	6	4.4	GO:0044444, GO:0015630, GO:0044430	cytoplasmic part, microtubule cytoskeleton, cytoskeletal part
3	GO:0044420	extracellular matrix part	9	4.37	GO:0005575, GO:0031012	cellular_component, extracellular matrix
4	GO:0005578	proteinaceous extracellular matrix	9	4.37	GO:0044421, GO:0031012	extracellular region part, extracellular matrix
7	GO:0016585	chromatin remodeling complex	6	4.32	GO:0044428, GO:0043234	nuclear part, protein complex
8	GO:0030141	secretory granule	6	4.28	GO:0016023	cytoplasmic membrane-bounded vesicle
8	GO:0000790	nuclear chromatin	5	4.2	GO:0044454, GO:0000785	nuclear chromosome part, chromatin
6	GO:0035770	ribonucleoprotein granule	7	4.2	GO:0030529, GO:0044444, GO:0043232	ribonucleoprotein complex, cytoplasmic part, intracellular non-membrane-bounded organelle
8	GO:0005925	focal adhesion	4	4	GO:0005924	cell-substrate adherens junction
6	GO:0005743	mitochondrial inner membrane	4	4	GO:0031966, GO:0019866	mitochondrial membrane, organelle inner membrane
7	GO:0005813	centrosome	4	4	GO:0043232, GO:0005815	intracellular non-membrane-bounded organelle, microtubule organizing center
6	GO:0043195	terminal button	4	4	GO:0043679, GO:0044456, GO:0033267	axon terminus, synapse part, axon part
6	GO:0030659	cytoplasmic vesicle membrane	6	3.94	GO:0044433, GO:0012506, GO:0016023	cytoplasmic vesicle part, vesicle membrane, cytoplasmic membrane-bounded vesicle
3	GO:0031982	vesicle	15	3.91	GO:0043226	organelle
5	GO:0019866	organelle inner membrane	7	3.82	GO:0031967, GO:0031090, GO:0044424	organelle envelope, organelle membrane, intracellular part
6	GO:0033267	axon part	7	3.76	GO:0030424, GO:0044463	axon, cell projection part
5	GO:0005929	cilium	5	3.72	GO:0042995	cell projection
8	GO:0005764	lysosome	4	3.6	GO:0000323	lytic vacuole
6	GO:0034399	nuclear periphery	5	3.6	GO:0044428, GO:0031981	nuclear part, nuclear lumen
6	GO:0043679	axon terminus	5	3.4	GO:0044306, GO:0033267	neuron projection terminus, axon part
4	GO:0031252	cell leading edge	6	3.38	GO:0044464	cell part
4	GO:0012506	vesicle membrane	7	3.37	GO:0031090, GO:0031988, GO:0012505	organelle membrane, membrane-bounded vesicle, endomembrane system
7	GO:0031519	PcG protein complex	4	3.2	GO:0044428, GO:0043234	nuclear part, protein complex
8	GO:0016604	nuclear body	4	3.2	GO:0044451	nucleoplasm part
10	GO:0008021	synaptic vesicle	4	3.2	GO:0044456, GO:0030136	synapse part, clathrin-coated vesicle
5	GO:0044433	cytoplasmic vesicle part	7	3.13	GO:0031410, GO:0044446, GO:0044444	cytoplasmic vesicle, intracellular organelle part, cytoplasmic part
7	GO:0030662	coated vesicle membrane	4	3.08	GO:0030135, GO:0030659	coated vesicle, cytoplasmic vesicle membrane
4	GO:0005912	adherens junction	6	3.04	GO:0070161	anchoring junction
6	GO:0035068	micro-ribonucleoprotein complex	3	3	GO:0030529	ribonucleoprotein complex
5	GO:0014069	postsynaptic density	3	3	GO:0044456, GO:0044327, GO:0044430	synapse part, dendritic spine head, cytoskeletal part
6	GO:0005643	nuclear pore	3	3	GO:0044428, GO:0005635, GO:0046930	nuclear part, nuclear envelope, pore complex
6	GO:0070937	CRD-mediated mRNA stability complex	3	3	GO:0044444, GO:0043234	cytoplasmic part, protein complex
8	GO:0000118	histone deacetylase complex	3	3	GO:0044451, GO:0016585	nucleoplasm part, chromatin remodeling complex
6	GO:0030176	integral to endoplasmic reticulum membrane	3	3	GO:0031301, GO:0031227	integral to organelle membrane, intrinsic to endoplasmic reticulum membrane
6	GO:0005844	polysome	3	3	GO:0030529	ribonucleoprotein complex
8	GO:0005792	microsome	3	3	GO:0042598	vesicular fraction
6	GO:0031966	mitochondrial membrane	4	3	GO:0031090, GO:0044429, GO:0005740	organelle membrane, mitochondrial part, mitochondrial envelope
7	GO:0071013	catalytic step 2 spliceosome	3	3	GO:0005681	spliceosomal complex
6	GO:0005840	ribosome	3	3	GO:0030529, GO:0044444, GO:0043232	ribonucleoprotein complex, cytoplasmic part, intracellular non-membrane-bounded organelle
8	GO:0017053	transcriptional repressor complex	3	3	GO:0044451, GO:0043234	nucleoplasm part, protein complex
6	GO:0044429	mitochondrial part	4	2.88	GO:0044446, GO:0044444, GO:0005739	intracellular organelle part, cytoplasmic part, mitochondrion
7	GO:0030666	endocytic vesicle membrane	4	2.82	GO:0030659, GO:0030139	cytoplasmic vesicle membrane, endocytic vesicle
7	GO:0042598	vesicular fraction	4	2.8	GO:0005624	membrane fraction
8	GO:0030135	coated vesicle	7	2.76	GO:0016023	cytoplasmic membrane-bounded vesicle
4	GO:0097060	synaptic membrane	4	2.76	GO:0044456, GO:0016020	synapse part, membrane
6	GO:0000228	nuclear chromosome	8	2.74	GO:0044428, GO:0031981, GO:0005694	nuclear part, nuclear lumen, chromosome
4	GO:0019898	extrinsic to membrane	4	2.72	GO:0044425	membrane part
4	GO:0031975	envelope	13	2.71	GO:0044464	cell part
6	GO:0031965	nuclear membrane	5	2.62	GO:0044428, GO:0031090, GO:0005635	nuclear part, organelle membrane, nuclear envelope
2	GO:0031012	extracellular matrix	9	2.62	GO:0005575	cellular_component
6	GO:0005901	caveola	3	2.6	GO:0044459, GO:0045121	plasma membrane part, membrane raft
5	GO:0042734	presynaptic membrane	3	2.6	GO:0097060	synaptic membrane
4	GO:0045121	membrane raft	4	2.56	GO:0044425	membrane part
7	GO:0030658	transport vesicle membrane	3	2.52	GO:0030659, GO:0030133	cytoplasmic vesicle membrane, transport vesicle
6	GO:0031301	integral to organelle membrane	4	2.4	GO:0016021, GO:0031300	integral to membrane, intrinsic to organelle membrane
6	GO:0005768	endosome	4	2.39	GO:0044444, GO:0043231	cytoplasmic part, intracellular membrane-bounded organelle
7	GO:0005924	cell-substrate adherens junction	4	2.4	GO:0005912, GO:0030055	adherens junction, cell-substrate junction
6	GO:0005637	nuclear inner membrane	3	2.36	GO:0031965, GO:0019866	nuclear membrane, organelle inner membrane
8	GO:0030139	endocytic vesicle	5	2.29	GO:0016023	cytoplasmic membrane-bounded vesicle
7	GO:0030016	myofibril	3	2.22	GO:0043292	contractile fiber
7	GO:0010008	endosome membrane	3	2.2	GO:0044440, GO:0031090	endosomal part, organelle membrane
7	GO:0005819	spindle	2	2.2	GO:0043232, GO:0015630, GO:0044430	intracellular non-membrane-bounded organelle, microtubule cytoskeleton, cytoskeletal part
4	GO:0008287	protein serine/threonine phosphatase complex	2	2.2	GO:0044464, GO:0043234	cell part, protein complex
7	GO:0000323	lytic vacuole	4	2.16	GO:0005773	vacuole
7	GO:0005740	mitochondrial envelope	4	2.16	GO:0031967, GO:0044429	organelle envelope, mitochondrial part
6	GO:0031253	cell projection membrane	4	2.16	GO:0044463, GO:0044459	cell projection part, plasma membrane part
6	GO:0005773	vacuole	6	2.11	GO:0044444, GO:0043231	cytoplasmic part, intracellular membrane-bounded organelle
8	GO:0030133	transport vesicle	4	2.11	GO:0016023	cytoplasmic membrane-bounded vesicle
6	GO:0043197	dendritic spine	4	2.08	GO:0044463, GO:0030425, GO:0044309	cell projection part, dendrite, neuron spine
5	GO:0044306	neuron projection terminus	5	2.04	GO:0044463, GO:0043005	cell projection part, neuron projection
7	GO:0005795	Golgi stack	2	2	GO:0044431	Golgi apparatus part
4	GO:0030672	synaptic vesicle membrane	2	2	GO:0044456, GO:0008021, GO:0030665	synapse part, synaptic vesicle, clathrin coated vesicle membrane
7	GO:0010494	cytoplasmic stress granule	2	2	GO:0035770	ribonucleoprotein granule
5	GO:0005923	tight junction	2	2	GO:0043296, GO:0070160	apical junction complex, occluding junction
7	GO:0005791	rough endoplasmic reticulum	2	2	GO:0005783	endoplasmic reticulum
7	GO:0005802	trans-Golgi network	2	2	GO:0043231	intracellular membrane-bounded organelle
5	GO:0030426	growth cone	2	2	GO:0030427, GO:0044463, GO:0043005	site of polarized growth, cell projection part, neuron projection
9	GO:0035098	ESC/E(Z) complex	2	2	GO:0035097, GO:0031519	histone methyltransferase complex, PcG protein complex
8	GO:0005677	chromatin silencing complex	2	2	GO:0016585	chromatin remodeling complex
7	GO:0031523	Myb complex	2	2	GO:0043234, GO:0044427	protein complex, chromosomal part
7	GO:0030130	clathrin coat of trans-Golgi network vesicle	2	2	GO:0012510, GO:0044431, GO:0030125	trans-Golgi network transport vesicle membrane, Golgi apparatus part, clathrin vesicle coat
4	GO:0030027	lamellipodium	2	2	GO:0042995, GO:0031252	cell projection, cell leading edge
7	GO:0005788	endoplasmic reticulum lumen	2	2	GO:0044432, GO:0070013	endoplasmic reticulum part, intracellular organelle lumen
6	GO:0071204	histone pre-mRNA 3'end processing complex	2	2	GO:0030529, GO:0044428	ribonucleoprotein complex, nuclear part
7	GO:0016342	catenin complex	2	2	GO:0019897, GO:0043234	extrinsic to plasma membrane, protein complex
5	GO:0043204	perikaryon	2	2	GO:0044464, GO:0043025	cell part, neuronal cell body
5	GO:0045211	postsynaptic membrane	2	2	GO:0097060	synaptic membrane
9	GO:0042470	melanosome	2	2	GO:0048770	pigment granule
7	GO:0000775	chromosome, centromeric region	2	2	GO:0044427	chromosomal part
4	GO:0005640	nuclear outer membrane	2	2	GO:0031965, GO:0031968, GO:0044425, GO:0042175	nuclear membrane, organelle outer membrane, membrane part, nuclear outer membrane-endoplasmic reticulum membrane network
7	GO:0016442	RNA-induced silencing complex	2	2	GO:0031332	RNAi effector complex
5	GO:0014704	intercalated disc	2	2	GO:0044291	cell-cell contact zone
5	GO:0005845	mRNA cap binding complex	2	2	GO:0044424, GO:0034518	intracellular part, RNA cap binding complex
4	GO:0005905	coated pit	3	1.96	GO:0044425, GO:0012505	membrane part, endomembrane system
3	GO:0070161	anchoring junction	6	1.82	GO:0030054	cell junction
5	GO:0046930	pore complex	3	1.8	GO:0016021, GO:0043234, GO:0044425	integral to membrane, protein complex, membrane part
6	GO:0005583	fibrillar collagen	3	1.8	GO:0005202	collagen
5	GO:0031968	organelle outer membrane	3	1.8	GO:0031967, GO:0031090, GO:0019867, GO:0044424	organelle envelope, organelle membrane, outer membrane, intracellular part
5	GO:0031227	intrinsic to endoplasmic reticulum membrane	3	1.8	GO:0044432, GO:0031300, GO:0005789	endoplasmic reticulum part, intrinsic to organelle membrane, endoplasmic reticulum membrane
5	GO:0044327	dendritic spine head	3	1.8	GO:0044463, GO:0043197	cell projection part, dendritic spine
7	GO:0005887	integral to plasma membrane	3	1.8	GO:0016021, GO:0031226	integral to membrane, intrinsic to plasma membrane
8	GO:0035097	histone methyltransferase complex	3	1.8	GO:0044451, GO:0034708	nucleoplasm part, methyltransferase complex
8	GO:0030140	trans-Golgi network transport vesicle	3	1.72	GO:0030133, GO:0005798, GO:0030136	transport vesicle, Golgi-associated vesicle, clathrin-coated vesicle
7	GO:0030118	clathrin coat	2	1.68	GO:0030117	membrane coat
6	GO:0031226	intrinsic to plasma membrane	4	1.68	GO:0044459, GO:0031224	plasma membrane part, intrinsic to membrane
8	GO:0000791	euchromatin	2	1.6	GO:0000785	chromatin
4	GO:0030132	clathrin coat of coated pit	2	1.6	GO:0005905, GO:0044459, GO:0030118	coated pit, plasma membrane part, clathrin coat
6	GO:0009898	internal side of plasma membrane	2	1.6	GO:0044459	plasma membrane part
6	GO:0042383	sarcolemma	2	1.6	GO:0005886	plasma membrane
4	GO:0043209	myelin sheath	2	1.6	GO:0044464	cell part
4	GO:0048786	presynaptic active zone	2	1.6	GO:0044456	synapse part
4	GO:0043205	fibril	2	1.6	GO:0044420, GO:0005578	extracellular matrix part, proteinaceous extracellular matrix
8	GO:0043596	nuclear replication fork	2	1.6	GO:0044454, GO:0005657	nuclear chromosome part, replication fork
4	GO:0001726	ruffle	2	1.6	GO:0042995, GO:0031252	cell projection, cell leading edge
8	GO:0030125	clathrin vesicle coat	2	1.56	GO:0030120, GO:0030665, GO:0030118	vesicle coat, clathrin coated vesicle membrane, clathrin coat
10	GO:0060198	clathrin sculpted vesicle	1	1.44	GO:0030136	clathrin-coated vesicle
5	GO:0030055	cell-substrate junction	4	1.44	GO:0016323, GO:0030054	basolateral plasma membrane, cell junction
4	GO:0031300	intrinsic to organelle membrane	4	1.44	GO:0044446, GO:0031090, GO:0031224	intracellular organelle part, organelle membrane, intrinsic to membrane
4	GO:0005202	collagen	4	1.44	GO:0044420, GO:0005578	extracellular matrix part, proteinaceous extracellular matrix
6	GO:0043292	contractile fiber	3	1.42	GO:0044444, GO:0043232	cytoplasmic part, intracellular non-membrane-bounded organelle
6	GO:0016528	sarcoplasm	2	1.36	GO:0005737	cytoplasm
8	GO:0000793	condensed chromosome	2	1.36	GO:0005694	chromosome
8	GO:0030669	clathrin-coated endocytic vesicle membrane	2	1.36	GO:0045334, GO:0030665, GO:0030666	clathrin-coated endocytic vesicle, clathrin coated vesicle membrane, endocytic vesicle membrane
6	GO:0044440	endosomal part	3	1.32	GO:0044446, GO:0044444, GO:0005768	intracellular organelle part, cytoplasmic part, endosome
6	GO:0044309	neuron spine	4	1.25	GO:0043005	neuron projection
6	GO:0019897	extrinsic to plasma membrane	2	1.2	GO:0044459, GO:0019898	plasma membrane part, extrinsic to membrane
4	GO:0030427	site of polarized growth	2	1.2	GO:0044464	cell part
5	GO:0043296	apical junction complex	2	1.2	GO:0016327, GO:0005911	apicolateral plasma membrane, cell-cell junction
6	GO:0044304	main axon	2	1.2	GO:0033267	axon part
7	GO:0005774	vacuolar membrane	2	1.2	GO:0031090, GO:0044437	organelle membrane, vacuolar part
5	GO:0044441	cilium part	2	1.2	GO:0005929, GO:0044446, GO:0044463	cilium, intracellular organelle part, cell projection part
7	GO:0005759	mitochondrial matrix	1	1.2	GO:0070013, GO:0044429	intracellular organelle lumen, mitochondrial part
9	GO:0031091	platelet alpha granule	2	1.2	GO:0030141	secretory granule
4	GO:0070160	occluding junction	2	1.2	GO:0005911	cell-cell junction
4	GO:0043235	receptor complex	2	1.2	GO:0043234	protein complex
8	GO:0012510	trans-Golgi network transport vesicle membrane	2	1.2	GO:0030140, GO:0030660, GO:0030665, GO:0030658	trans-Golgi network transport vesicle, Golgi-associated vesicle membrane, clathrin coated vesicle membrane, transport vesicle membrane
4	GO:0034518	RNA cap binding complex	2	1.2	GO:0043234	protein complex
8	GO:0048770	pigment granule	2	1.2	GO:0016023	cytoplasmic membrane-bounded vesicle
5	GO:0033176	proton-transporting V-type ATPase complex	1	1.2	GO:0016469	proton-transporting two-sector ATPase complex
6	GO:0031332	RNAi effector complex	2	1.2	GO:0030529	ribonucleoprotein complex
7	GO:0030667	secretory granule membrane	2	1.2	GO:0030141, GO:0030659	secretory granule, cytoplasmic vesicle membrane
4	GO:0044291	cell-cell contact zone	2	1.2	GO:0005911	cell-cell junction
3	GO:0019867	outer membrane	3	1.08	GO:0016020	membrane
5	GO:0034708	methyltransferase complex	3	1.08	GO:0043234, GO:0044424	protein complex, intracellular part
8	GO:0005798	Golgi-associated vesicle	3	1.03	GO:0044431, GO:0016023	Golgi apparatus part, cytoplasmic membrane-bounded vesicle
5	GO:0031526	brush border membrane	1	1	GO:0005903, GO:0031253	brush border, cell projection membrane
6	GO:0043198	dendritic shaft	1	1	GO:0044463, GO:0030425	cell projection part, dendrite
7	GO:0005592	collagen type XI	1	1	GO:0005583	fibrillar collagen
7	GO:0005639	integral to nuclear inner membrane	1	1	GO:0031301, GO:0031229	integral to organelle membrane, intrinsic to nuclear inner membrane
4	GO:0005642	annulate lamellae	1	1	GO:0044425, GO:0042175	membrane part, nuclear outer membrane-endoplasmic reticulum membrane network
9	GO:0016589	NURF complex	1	1	GO:0031010	ISWI complex
8	GO:0070083	clathrin sculpted monoamine transport vesicle membrane	1	1	GO:0070081, GO:0030665, GO:0030658	clathrin sculpted monoamine transport vesicle, clathrin coated vesicle membrane, transport vesicle membrane
5	GO:0031235	intrinsic to internal side of plasma membrane	1	1	GO:0009898, GO:0031226	internal side of plasma membrane, intrinsic to plasma membrane
7	GO:0005586	collagen type III	1	1	GO:0005583	fibrillar collagen
9	GO:0033553	rDNA heterochromatin	1	1	GO:0000792	heterochromatin
5	GO:0072357	PTW/PP1 phosphatase complex	1	1	GO:0008287	protein serine/threonine phosphatase complex
10	GO:0061202	clathrin sculpted gamma-aminobutyric acid transport vesicle membrane	1	1	GO:0030665, GO:0061200	clathrin coated vesicle membrane, clathrin sculpted gamma-aminobutyric acid transport vesicle
6	GO:0000164	protein phosphatase type 1 complex	1	1	GO:0008287, GO:0044444	protein serine/threonine phosphatase complex, cytoplasmic part
4	GO:0030496	midbody	1	1	GO:0044464	cell part
5	GO:0000502	proteasome complex	1	1	GO:0043234, GO:0044424	protein complex, intracellular part
7	GO:0031298	replication fork protection complex	1	1	GO:0044454, GO:0043234, GO:0043596	nuclear chromosome part, protein complex, nuclear replication fork
9	GO:0016605	PML body	1	1	GO:0016604	nuclear body
8	GO:0031213	RSF complex	1	1	GO:0016585	chromatin remodeling complex
3	GO:0031594	neuromuscular junction	1	1	GO:0045202	synapse
6	GO:0005652	nuclear lamina	1	1	GO:0044428, GO:0034399	nuclear part, nuclear periphery
9	GO:0031045	dense core granule	1	1	GO:0030141	secretory granule
6	GO:0030530	heterogeneous nuclear ribonucleoprotein complex	1	1	GO:0030529, GO:0044428	ribonucleoprotein complex, nuclear part
5	GO:0043512	inhibin A complex	1	1	GO:0043511	inhibin complex
7	GO:0035253	ciliary rootlet	1	1	GO:0044441, GO:0044430	cilium part, cytoskeletal part
5	GO:0002095	caveolar macromolecular signaling complex	1	1	GO:0005901, GO:0043234, GO:0044459	caveola, protein complex, plasma membrane part
5	GO:0030315	T-tubule	1	1	GO:0042383, GO:0044459	sarcolemma, plasma membrane part
9	GO:0045335	phagocytic vesicle	1	1	GO:0030139	endocytic vesicle
6	GO:0005853	eukaryotic translation elongation factor 1 complex	1	1	GO:0044444, GO:0043234	cytoplasmic part, protein complex
5	GO:0033180	proton-transporting V-type ATPase, V1 domain	1	1	GO:0033176, GO:0033178	proton-transporting V-type ATPase complex, proton-transporting two-sector ATPase complex, catalytic domain
5	GO:0030175	filopodium	1	1	GO:0042995	cell projection
8	GO:0005778	peroxisomal membrane	1	1	GO:0031903, GO:0044439	microbody membrane, peroxisomal part
6	GO:0042587	glycogen granule	1	1	GO:0044444	cytoplasmic part
7	GO:0005776	autophagic vacuole	1	1	GO:0005773	vacuole
6	GO:0042645	mitochondrial nucleoid	1	1	GO:0005759, GO:0044429, GO:0009295	mitochondrial matrix, mitochondrial part, nucleoid
5	GO:0016471	vacuolar proton-transporting V-type ATPase complex	1	1	GO:0005774, GO:0044437, GO:0033176	vacuolar membrane, vacuolar part, proton-transporting V-type ATPase complex
7	GO:0044300	cerebellar mossy fiber	1	1	GO:0030424	axon
6	GO:0051233	spindle midzone	1	1	GO:0005819, GO:0044430	spindle, cytoskeletal part
8	GO:0060201	clathrin sculpted acetylcholine transport vesicle membrane	1	1	GO:0060200, GO:0030665, GO:0030658	clathrin sculpted acetylcholine transport vesicle, clathrin coated vesicle membrane, transport vesicle membrane
8	GO:0016592	mediator complex	1	1	GO:0044451, GO:0043234	nucleoplasm part, protein complex
6	GO:0001527	microfibril	1	1	GO:0043205	fibril
9	GO:0005719	nuclear euchromatin	1	1	GO:0000791, GO:0000790	euchromatin, nuclear chromatin
6	GO:0016281	eukaryotic translation initiation factor 4F complex	1	1	GO:0044444, GO:0043234	cytoplasmic part, protein complex
5	GO:0042575	DNA polymerase complex	1	1	GO:0043234, GO:0044424	protein complex, intracellular part
5	GO:0042719	mitochondrial intermembrane space protein transporter complex	1	1	GO:0043234, GO:0005758, GO:0044429	protein complex, mitochondrial intermembrane space, mitochondrial part
6	GO:0045323	interleukin-1 receptor complex	1	1	GO:0043235, GO:0005887, GO:0044459	receptor complex, integral to plasma membrane, plasma membrane part
8	GO:0072686	mitotic spindle	1	1	GO:0005819	spindle
7	GO:0005584	collagen type I	1	1	GO:0005583	fibrillar collagen
8	GO:0031092	platelet alpha granule membrane	1	1	GO:0031091, GO:0030667	platelet alpha granule, secretory granule membrane
7	GO:0055038	recycling endosome membrane	1	1	GO:0010008, GO:0055037	endosome membrane, recycling endosome
3	GO:0060076	excitatory synapse	1	1	GO:0045202	synapse
6	GO:0005811	lipid particle	1	1	GO:0044444	cytoplasmic part
8	GO:0005665	DNA-directed RNA polymerase II, core complex	1	1	GO:0044451, GO:0055029, GO:0016591	nucleoplasm part, nuclear DNA-directed RNA polymerase complex, DNA-directed RNA polymerase II, holoenzyme
9	GO:0001669	acrosomal vesicle	1	1	GO:0030141	secretory granule
5	GO:0005587	collagen type IV	1	1	GO:0005604, GO:0030935	basement membrane, sheet-forming collagen
5	GO:0043509	activin A complex	1	1	GO:0048180	activin complex
7	GO:0030122	AP-2 adaptor complex	1	1	GO:0030131, GO:0044433, GO:0044459, GO:0030132, GO:0030128	clathrin adaptor complex, cytoplasmic vesicle part, plasma membrane part, clathrin coat of coated pit, clathrin coat of endocytic vesicle
4	GO:0005913	cell-cell adherens junction	1	1	GO:0005912, GO:0005911	adherens junction, cell-cell junction
4	GO:0030117	membrane coat	2	1.01	GO:0044444, GO:0043234, GO:0048475, GO:0044425	cytoplasmic part, protein complex, coated membrane, membrane part
8	GO:0005871	kinesin complex	1	1	GO:0005875	microtubule associated complex
4	GO:0009897	external side of plasma membrane	1	1	GO:0009986, GO:0044459	cell surface, plasma membrane part
6	GO:0008076	voltage-gated potassium channel complex	1	1	GO:0005887, GO:0044459, GO:0034705	integral to plasma membrane, plasma membrane part, potassium channel complex
9	GO:0070688	MLL5-L complex	1	1	GO:0035097	histone methyltransferase complex
5	GO:0048787	presynaptic active zone membrane	1	1	GO:0042734, GO:0048786	presynaptic membrane, presynaptic active zone
8	GO:0005765	lysosomal membrane	1	1	GO:0005774, GO:0005764	vacuolar membrane, lysosome
7	GO:0005689	U12-type spliceosomal complex	1	1	GO:0005681	spliceosomal complex
8	GO:0031093	platelet alpha granule lumen	1	1	GO:0031091, GO:0034774	platelet alpha granule, secretory granule lumen
8	GO:0042584	chromaffin granule membrane	1	1	GO:0030667, GO:0042583	secretory granule membrane, chromaffin granule
5	GO:0000151	ubiquitin ligase complex	1	1	GO:0043234, GO:0044424	protein complex, intracellular part
7	GO:0005874	microtubule	1	1	GO:0043234, GO:0015630, GO:0044430	protein complex, microtubule cytoskeleton, cytoskeletal part
7	GO:0031011	Ino80 complex	1	1	GO:0097346, GO:0044454, GO:0000790, GO:0033202	INO80-type complex, nuclear chromosome part, nuclear chromatin, DNA helicase complex
6	GO:0005741	mitochondrial outer membrane	1	1	GO:0031966, GO:0031968	mitochondrial membrane, organelle outer membrane
6	GO:0034361	very-low-density lipoprotein particle	1	1	GO:0034385	triglyceride-rich lipoprotein particle
5	GO:0005954	calcium- and calmodulin-dependent protein kinase complex	1	1	GO:0043234, GO:0044424	protein complex, intracellular part
5	GO:0016234	inclusion body	1	1	GO:0044424	intracellular part
6	GO:0005890	sodium:potassium-exchanging ATPase complex	1	1	GO:0043234, GO:0005887, GO:0044459	protein complex, integral to plasma membrane, plasma membrane part
7	GO:0031901	early endosome membrane	1	1	GO:0010008, GO:0005769	endosome membrane, early endosome
8	GO:0060203	clathrin sculpted glutamate transport vesicle membrane	1	1	GO:0030665, GO:0030658, GO:0060199	clathrin coated vesicle membrane, transport vesicle membrane, clathrin sculpted glutamate transport vesicle
6	GO:0043196	varicosity	1	1	GO:0044304, GO:0033267	main axon, axon part
4	GO:0043218	compact myelin	1	1	GO:0044464, GO:0043209	cell part, myelin sheath
6	GO:0016507	mitochondrial fatty acid beta-oxidation multienzyme complex	1	1	GO:0005759, GO:0036125, GO:0044429	mitochondrial matrix, fatty acid beta-oxidation multienzyme complex, mitochondrial part
5	GO:0030018	Z disc	1	1	GO:0031674, GO:0044449	I band, contractile fiber part
9	GO:0001673	male germ cell nucleus	1	1	GO:0043073	germ cell nucleus
5	GO:0002116	semaphorin receptor complex	1	1	GO:0043235	receptor complex
7	GO:0060170	cilium membrane	1	1	GO:0044441, GO:0031253	cilium part, cell projection membrane
6	GO:0030673	axolemma	1	1	GO:0044304, GO:0033267, GO:0032589	main axon, axon part, neuron projection membrane
5	GO:0032587	ruffle membrane	1	1	GO:0031256, GO:0001726, GO:0031253	leading edge membrane, ruffle, cell projection membrane
7	GO:0005770	late endosome	1	1	GO:0005768	endosome
5	GO:0031225	anchored to membrane	1	1	GO:0031224	intrinsic to membrane
7	GO:0033017	sarcoplasmic reticulum membrane	1	1	GO:0005789, GO:0016529	endoplasmic reticulum membrane, sarcoplasmic reticulum
9	GO:0016607	nuclear speck	1	1	GO:0016604	nuclear body
4	GO:0097059	CNTFR-CLCF1 complex	1	1	GO:0005615, GO:0044421, GO:0043234	extracellular space, extracellular region part, protein complex
8	GO:0000795	synaptonemal complex	1	1	GO:0044454, GO:0000794	nuclear chromosome part, condensed nuclear chromosome
6	GO:0005891	voltage-gated calcium channel complex	1	1	GO:0034704, GO:0044459	calcium channel complex, plasma membrane part
6	GO:0030479	actin cortical patch	1	1	GO:0044448, GO:0030864, GO:0044430	cell cortex part, cortical actin cytoskeleton, cytoskeletal part
7	GO:0005657	replication fork	2	0.96	GO:0044427	chromosomal part
4	GO:0031256	leading edge membrane	2	0.96	GO:0031252, GO:0044459	cell leading edge, plasma membrane part
7	GO:0030120	vesicle coat	2	0.94	GO:0030117, GO:0044433, GO:0030662	membrane coat, cytoplasmic vesicle part, coated vesicle membrane
9	GO:0045334	clathrin-coated endocytic vesicle	2	0.82	GO:0030139, GO:0030136	endocytic vesicle, clathrin-coated vesicle
6	GO:0016327	apicolateral plasma membrane	2	0.72	GO:0044459	plasma membrane part
5	GO:0034703	cation channel complex	2	0.72	GO:0034702	ion channel complex
6	GO:0030660	Golgi-associated vesicle membrane	2	0.72	GO:0030659, GO:0005798, GO:0000139	cytoplasmic vesicle membrane, Golgi-associated vesicle, Golgi membrane
4	GO:0016469	proton-transporting two-sector ATPase complex	1	0.72	GO:0043234, GO:0044425	protein complex, membrane part
6	GO:0044437	vacuolar part	2	0.72	GO:0044446, GO:0044444, GO:0005773	intracellular organelle part, cytoplasmic part, vacuole
6	GO:0016529	sarcoplasmic reticulum	1	0.6	GO:0005783, GO:0016528	endoplasmic reticulum, sarcoplasm
5	GO:0032589	neuron projection membrane	1	0.6	GO:0031256, GO:0043005, GO:0031253	leading edge membrane, neuron projection, cell projection membrane
5	GO:0005903	brush border	1	0.6	GO:0042995	cell projection
7	GO:0044439	peroxisomal part	1	0.6	GO:0044438, GO:0005777	microbody part, peroxisome
9	GO:0060200	clathrin sculpted acetylcholine transport vesicle	1	0.6	GO:0030133, GO:0060198	transport vesicle, clathrin sculpted vesicle
7	GO:0055037	recycling endosome	1	0.6	GO:0005768	endosome
8	GO:0043073	germ cell nucleus	1	0.6	GO:0005634	nucleus
9	GO:0042583	chromaffin granule	1	0.6	GO:0030141	secretory granule
4	GO:0048180	activin complex	1	0.6	GO:0005615, GO:0044421, GO:0043234	extracellular space, extracellular region part, protein complex
11	GO:0061200	clathrin sculpted gamma-aminobutyric acid transport vesicle	1	0.6	GO:0060198	clathrin sculpted vesicle
8	GO:0000792	heterochromatin	1	0.6	GO:0000785	chromatin
7	GO:0055029	nuclear DNA-directed RNA polymerase complex	1	0.6	GO:0044428, GO:0000428	nuclear part, DNA-directed RNA polymerase complex
6	GO:0005758	mitochondrial intermembrane space	1	0.6	GO:0044429, GO:0031970, GO:0005740	mitochondrial part, organelle envelope lumen, mitochondrial envelope
6	GO:0034704	calcium channel complex	1	0.6	GO:0034703	cation channel complex
6	GO:0031229	intrinsic to nuclear inner membrane	1	0.6	GO:0044453, GO:0005637, GO:0031300	nuclear membrane part, nuclear inner membrane, intrinsic to organelle membrane
4	GO:0043511	inhibin complex	1	0.6	GO:0005615, GO:0044421, GO:0043234	extracellular space, extracellular region part, protein complex
7	GO:0030864	cortical actin cytoskeleton	1	0.6	GO:0015629, GO:0030863, GO:0044430	actin cytoskeleton, cortical cytoskeleton, cytoskeletal part
4	GO:0033178	proton-transporting two-sector ATPase complex, catalytic domain	1	0.6	GO:0043234, GO:0016469, GO:0044425	protein complex, proton-transporting two-sector ATPase complex, membrane part
5	GO:0033202	DNA helicase complex	1	0.6	GO:0043234, GO:0044424	protein complex, intracellular part
8	GO:0031010	ISWI complex	1	0.6	GO:0016585	chromatin remodeling complex
9	GO:0070081	clathrin sculpted monoamine transport vesicle	1	0.6	GO:0030133, GO:0060198	transport vesicle, clathrin sculpted vesicle
5	GO:0030131	clathrin adaptor complex	1	0.6	GO:0030118, GO:0030119	clathrin coat, AP-type membrane coat adaptor complex
8	GO:0030128	clathrin coat of endocytic vesicle	1	0.6	GO:0030669, GO:0030125	clathrin-coated endocytic vesicle membrane, clathrin vesicle coat
6	GO:0030935	sheet-forming collagen	1	0.6	GO:0005202	collagen
5	GO:0034385	triglyceride-rich lipoprotein particle	1	0.6	GO:0034358	plasma lipoprotein particle
7	GO:0005769	early endosome	1	0.6	GO:0005768	endosome
8	GO:0016591	DNA-directed RNA polymerase II, holoenzyme	1	0.6	GO:0044451, GO:0055029	nucleoplasm part, nuclear DNA-directed RNA polymerase complex
3	GO:0048475	coated membrane	2	0.6	GO:0016020	membrane
7	GO:0005875	microtubule associated complex	1	0.6	GO:0043234, GO:0015630, GO:0044430	protein complex, microtubule cytoskeleton, cytoskeletal part
7	GO:0034774	secretory granule lumen	1	0.6	GO:0030141, GO:0060205	secretory granule, cytoplasmic membrane-bounded vesicle lumen
9	GO:0060199	clathrin sculpted glutamate transport vesicle	1	0.6	GO:0030133, GO:0060198	transport vesicle, clathrin sculpted vesicle
8	GO:0000794	condensed nuclear chromosome	1	0.6	GO:0000228, GO:0000793	nuclear chromosome, condensed chromosome
6	GO:0044448	cell cortex part	1	0.6	GO:0044444, GO:0005938	cytoplasmic part, cell cortex
6	GO:0034705	potassium channel complex	1	0.6	GO:0034703	cation channel complex
5	GO:0031674	I band	1	0.6	GO:0044449, GO:0030017	contractile fiber part, sarcomere
4	GO:0036125	fatty acid beta-oxidation multienzyme complex	1	0.6	GO:0043234	protein complex
7	GO:0031903	microbody membrane	1	0.6	GO:0031090, GO:0042579	organelle membrane, microbody
8	GO:0097346	INO80-type complex	1	0.6	GO:0016585	chromatin remodeling complex
7	GO:0009295	nucleoid	1	0.6	GO:0043232	intracellular non-membrane-bounded organelle
5	GO:0034702	ion channel complex	2	0.43	GO:0016021, GO:0043234, GO:0044425	integral to membrane, protein complex, membrane part
6	GO:0044438	microbody part	1	0.36	GO:0044446, GO:0044444, GO:0042579	intracellular organelle part, cytoplasmic part, microbody
6	GO:0042579	microbody	1	0.36	GO:0044444, GO:0043231	cytoplasmic part, intracellular membrane-bounded organelle
7	GO:0005777	peroxisome	1	0.36	GO:0042579	microbody
7	GO:0030017	sarcomere	1	0.36	GO:0044449, GO:0030016	contractile fiber part, myofibril
4	GO:0030119	AP-type membrane coat adaptor complex	1	0.36	GO:0044444, GO:0043234, GO:0030117, GO:0044425	cytoplasmic part, protein complex, membrane coat, membrane part
6	GO:0030863	cortical cytoskeleton	1	0.36	GO:0005856, GO:0044448	cytoskeleton, cell cortex part
6	GO:0000428	DNA-directed RNA polymerase complex	1	0.36	GO:0030880	RNA polymerase complex
4	GO:0034358	plasma lipoprotein particle	1	0.36	GO:0005615, GO:0044421, GO:0032994	extracellular space, extracellular region part, protein-lipid complex
5	GO:0031970	organelle envelope lumen	1	0.36	GO:0044446, GO:0031967, GO:0031974	intracellular organelle part, organelle envelope, membrane-enclosed lumen
5	GO:0044453	nuclear membrane part	1	0.36	GO:0044428, GO:0031965, GO:0044425	nuclear part, nuclear membrane, membrane part
6	GO:0044449	contractile fiber part	1	0.36	GO:0044444, GO:0043292, GO:0044422	cytoplasmic part, contractile fiber, organelle part
6	GO:0060205	cytoplasmic membrane-bounded vesicle lumen	1	0.36	GO:0044433, GO:0031983, GO:0016023	cytoplasmic vesicle part, vesicle lumen, cytoplasmic membrane-bounded vesicle
5	GO:0031983	vesicle lumen	1	0.22	GO:0043233, GO:0031988	organelle lumen, membrane-bounded vesicle
3	GO:0032994	protein-lipid complex	1	0.22	GO:0032991	macromolecular complex
5	GO:0030880	RNA polymerase complex	1	0.22	GO:0043234, GO:0044424	protein complex, intracellular part

## Sheet: molecular_function
LevelGO	Term(Acc)	Term(Name)	#Seq	Score	Parents(Acc)	Parents(Name)
2	GO:0005488	binding	177	152.98	GO:0003674	molecular_function
3	GO:0005515	protein binding	149	148.21	GO:0005488	binding
1	GO:0003674	molecular_function	190	126.3
4	GO:0003677	DNA binding	51	40.89	GO:0003676	nucleic acid binding
3	GO:0003676	nucleic acid binding	72	40.37	GO:0005488	binding
5	GO:0046872	metal ion binding	59	36.02	GO:0043169	cation binding
7	GO:0008270	zinc ion binding	34	34	GO:0046914	transition metal ion binding
3	GO:0003700	sequence-specific DNA binding transcription factor activity	33	28.16	GO:0001071	nucleic acid binding transcription factor activity
8	GO:0005524	ATP binding	25	25	GO:0035639, GO:0032559	purine ribonucleoside triphosphate binding, adenyl ribonucleotide binding
4	GO:0043169	cation binding	59	21.61	GO:0043167	ion binding
6	GO:0046914	transition metal ion binding	34	21.36	GO:0046872	metal ion binding
4	GO:0003723	RNA binding	24	19.74	GO:0003676	nucleic acid binding
7	GO:0035639	purine ribonucleoside triphosphate binding	32	19.2	GO:0032555	purine ribonucleotide binding
4	GO:0000166	nucleotide binding	49	18.96	GO:0036094	small molecule binding
2	GO:0001071	nucleic acid binding transcription factor activity	34	17.9	GO:0003674	molecular_function
4	GO:0005102	receptor binding	25	17.68	GO:0005515	protein binding
5	GO:0043565	sequence-specific DNA binding	20	17.11	GO:0003677	DNA binding
3	GO:0003682	chromatin binding	18	16.96	GO:0005488	binding
4	GO:0019899	enzyme binding	30	16.27	GO:0005515	protein binding
7	GO:0032559	adenyl ribonucleotide binding	27	15.72	GO:0030554, GO:0032555	adenyl nucleotide binding, purine ribonucleotide binding
4	GO:0042802	identical protein binding	19	14.6	GO:0005515	protein binding
4	GO:0046983	protein dimerization activity	18	14.2	GO:0005515	protein binding
3	GO:0043167	ion binding	59	12.97	GO:0005488	binding
6	GO:0032555	purine ribonucleotide binding	34	12.31	GO:0017076, GO:0032553	purine nucleotide binding, ribonucleotide binding
4	GO:0019904	protein domain specific binding	16	12.2	GO:0005515	protein binding
4	GO:0003712	transcription cofactor activity	17	12	GO:0000989	transcription factor binding transcription factor activity
3	GO:0036094	small molecule binding	49	11.37	GO:0005488	binding
6	GO:0019901	protein kinase binding	13	11	GO:0019900	kinase binding
5	GO:0046982	protein heterodimerization activity	11	11	GO:0046983	protein dimerization activity
5	GO:0042803	protein homodimerization activity	11	11	GO:0046983, GO:0042802	protein dimerization activity, identical protein binding
4	GO:0008134	transcription factor binding	13	10.48	GO:0005515	protein binding
6	GO:0004672	protein kinase activity	19	10.21	GO:0016301, GO:0016773	kinase activity, phosphotransferase activity, alcohol group as acceptor
2	GO:0003824	catalytic activity	70	10.1	GO:0003674	molecular_function
4	GO:0008092	cytoskeletal protein binding	12	10.04	GO:0005515	protein binding
5	GO:0003713	transcription coactivator activity	12	10	GO:0003712	transcription cofactor activity
3	GO:0004871	signal transducer activity	21	9.49	GO:0060089	molecular transducer activity
7	GO:0004674	protein serine/threonine kinase activity	12	9.48	GO:0004672	protein kinase activity
6	GO:0030554	adenyl nucleotide binding	27	9.43	GO:0017076	purine nucleotide binding
4	GO:0005543	phospholipid binding	11	9.12	GO:0008289	lipid binding
6	GO:0005509	calcium ion binding	9	9	GO:0046872	metal ion binding
5	GO:0003714	transcription corepressor activity	9	9	GO:0003712	transcription cofactor activity
6	GO:0044212	transcription regulatory region DNA binding	12	8.71	GO:0000975	regulatory region DNA binding
5	GO:0016301	kinase activity	21	8.34	GO:0016772	transferase activity, transferring phosphorus-containing groups
2	GO:0004872	receptor activity	16	8.22	GO:0003674	molecular_function
5	GO:0019900	kinase binding	14	8.2	GO:0019899	enzyme binding
3	GO:0000989	transcription factor binding transcription factor activity	18	8.16	GO:0000988	protein binding transcription factor activity
3	GO:0008289	lipid binding	14	8.02	GO:0005488	binding
6	GO:0003690	double-stranded DNA binding	8	8	GO:0043566	structure-specific DNA binding
5	GO:0032553	ribonucleotide binding	34	7.39	GO:0000166	nucleotide binding
5	GO:0017076	purine nucleotide binding	34	7.39	GO:0000166	nucleotide binding
7	GO:0017111	nucleoside-triphosphatase activity	15	7.04	GO:0016462	pyrophosphatase activity
8	GO:0005525	GTP binding	7	7	GO:0032561, GO:0035639	guanyl ribonucleotide binding, purine ribonucleoside triphosphate binding
4	GO:0032403	protein complex binding	9	7	GO:0005515	protein binding
4	GO:0008022	protein C-terminus binding	7	7	GO:0005515	protein binding
8	GO:0003924	GTPase activity	7	7	GO:0017111	nucleoside-triphosphatase activity
5	GO:0043566	structure-specific DNA binding	10	6.12	GO:0003677	DNA binding
5	GO:0016773	phosphotransferase activity, alcohol group as acceptor	19	6.13	GO:0016772	transferase activity, transferring phosphorus-containing groups
5	GO:0003779	actin binding	6	6	GO:0008092	cytoskeletal protein binding
4	GO:0042393	histone binding	6	6	GO:0005515	protein binding
6	GO:0031625	ubiquitin protein ligase binding	6	6	GO:0044389	small conjugating protein ligase binding
3	GO:0016740	transferase activity	32	6	GO:0003824	catalytic activity
2	GO:0060089	molecular transducer activity	21	5.69	GO:0003674	molecular_function
4	GO:0016772	transferase activity, transferring phosphorus-containing groups	23	5.44	GO:0016740	transferase activity
5	GO:0000975	regulatory region DNA binding	12	5.23	GO:0003677, GO:0001067	DNA binding, regulatory region nucleic acid binding
3	GO:0016787	hydrolase activity	31	5.21	GO:0003824	catalytic activity
4	GO:0008013	beta-catenin binding	5	5	GO:0005515	protein binding
2	GO:0005198	structural molecule activity	7	5	GO:0003674	molecular_function
4	GO:0005516	calmodulin binding	5	5	GO:0005515	protein binding
3	GO:0005201	extracellular matrix structural constituent	5	5	GO:0005198	structural molecule activity
2	GO:0000988	protein binding transcription factor activity	18	4.9	GO:0003674	molecular_function
7	GO:0032561	guanyl ribonucleotide binding	7	4.8	GO:0032555, GO:0019001	purine ribonucleotide binding, guanyl nucleotide binding
4	GO:0004888	transmembrane signaling receptor activity	9	4.74	GO:0038023	signaling receptor activity
4	GO:0031072	heat shock protein binding	5	4.6	GO:0005515	protein binding
3	GO:0038023	signaling receptor activity	11	4.4	GO:0004871, GO:0004872	signal transducer activity, receptor activity
5	GO:0003729	mRNA binding	6	4.4	GO:0003723	RNA binding
6	GO:0016462	pyrophosphatase activity	15	4.22	GO:0016818	hydrolase activity, acting on acid anhydrides, in phosphorus-containing anhydrides
2	GO:0005215	transporter activity	18	4.23	GO:0003674	molecular_function
5	GO:0005179	hormone activity	4	4.2	GO:0005102	receptor binding
5	GO:0035091	phosphatidylinositol binding	5	4.2	GO:0005543	phospholipid binding
7	GO:0004842	ubiquitin-protein ligase activity	4	4	GO:0019787	small conjugating protein ligase activity
4	GO:0001948	glycoprotein binding	4	4	GO:0005515	protein binding
5	GO:0017124	SH3 domain binding	4	4	GO:0019904	protein domain specific binding
6	GO:0003743	translation initiation factor activity	4	4	GO:0008135	translation factor activity, nucleic acid binding
4	GO:0051082	unfolded protein binding	4	4	GO:0005515	protein binding
3	GO:0022892	substrate-specific transporter activity	16	3.93	GO:0005215	transporter activity
4	GO:0000981	sequence-specific DNA binding RNA polymerase II transcription factor activity	7	3.6	GO:0003700	sequence-specific DNA binding transcription factor activity
7	GO:0035258	steroid hormone receptor binding	5	3.6	GO:0035257	nuclear hormone receptor binding
8	GO:0004722	protein serine/threonine phosphatase activity	4	3.6	GO:0004721	phosphoprotein phosphatase activity
5	GO:0044389	small conjugating protein ligase binding	6	3.6	GO:0019899	enzyme binding
5	GO:0008135	translation factor activity, nucleic acid binding	5	3.6	GO:0003723	RNA binding
4	GO:0008565	protein transporter activity	4	3.6	GO:0022892	substrate-specific transporter activity
4	GO:0019838	growth factor binding	5	3.4	GO:0005515	protein binding
4	GO:0001076	RNA polymerase II transcription factor binding transcription factor activity	6	3.28	GO:0000989	transcription factor binding transcription factor activity
2	GO:0030234	enzyme regulator activity	11	3.29	GO:0003674	molecular_function
4	GO:0001067	regulatory region nucleic acid binding	12	3.14	GO:0003676	nucleic acid binding
8	GO:0016887	ATPase activity	7	3.13	GO:0017111	nucleoside-triphosphatase activity
4	GO:0005057	receptor signaling protein activity	5	3.08	GO:0004871	signal transducer activity
5	GO:0008083	growth factor activity	3	3	GO:0005102	receptor binding
5	GO:0048407	platelet-derived growth factor binding	3	3	GO:0019838	growth factor binding
6	GO:0005545	1-phosphatidylinositol binding	3	3	GO:0035091	phosphatidylinositol binding
4	GO:0048306	calcium-dependent protein binding	3	3	GO:0005515	protein binding
5	GO:0042826	histone deacetylase binding	3	3	GO:0019899	enzyme binding
6	GO:0001105	RNA polymerase II transcription coactivator activity	3	3	GO:0001104, GO:0001190, GO:0003713	RNA polymerase II transcription cofactor activity, RNA polymerase II transcription factor binding transcription factor activity involved in positive regulation of transcription, transcription coactivator activity
6	GO:0000287	magnesium ion binding	3	3	GO:0046872	metal ion binding
8	GO:0050681	androgen receptor binding	3	3	GO:0035258	steroid hormone receptor binding
4	GO:0047485	protein N-terminus binding	3	3	GO:0005515	protein binding
6	GO:0019001	guanyl nucleotide binding	7	2.88	GO:0017076	purine nucleotide binding
5	GO:0001104	RNA polymerase II transcription cofactor activity	4	2.8	GO:0001076, GO:0003712	RNA polymerase II transcription factor binding transcription factor activity, transcription cofactor activity
5	GO:0001190	RNA polymerase II transcription factor binding transcription factor activity involved in positive regulation of transcription	4	2.8	GO:0001076	RNA polymerase II transcription factor binding transcription factor activity
5	GO:0001085	RNA polymerase II transcription factor binding	4	2.8	GO:0008134	transcription factor binding
6	GO:0035257	nuclear hormone receptor binding	6	2.76	GO:0051427	hormone receptor binding
7	GO:0004721	phosphoprotein phosphatase activity	4	2.76	GO:0016791	phosphatase activity
3	GO:0022857	transmembrane transporter activity	13	2.65	GO:0005215	transporter activity
4	GO:0046332	SMAD binding	3	2.6	GO:0005515	protein binding
3	GO:0016491	oxidoreductase activity	4	2.61	GO:0003824	catalytic activity
8	GO:0000987	core promoter proximal region sequence-specific DNA binding	3	2.6	GO:0001159, GO:0000976	core promoter proximal region DNA binding, transcription regulatory region sequence-specific DNA binding
5	GO:0016818	hydrolase activity, acting on acid anhydrides, in phosphorus-containing anhydrides	15	2.53	GO:0016817	hydrolase activity, acting on acid anhydrides
7	GO:0004713	protein tyrosine kinase activity	5	2.54	GO:0004672	protein kinase activity
7	GO:0000976	transcription regulatory region sequence-specific DNA binding	4	2.52	GO:0043565, GO:0044212	sequence-specific DNA binding, transcription regulatory region DNA binding
6	GO:0005216	ion channel activity	6	2.5	GO:0022838, GO:0015075	substrate-specific channel activity, ion transmembrane transporter activity
6	GO:0019787	small conjugating protein ligase activity	4	2.4	GO:0016881	acid-amino acid ligase activity
5	GO:0000982	RNA polymerase II core promoter proximal region sequence-specific DNA binding transcription factor activity	4	2.4	GO:0000981	sequence-specific DNA binding RNA polymerase II transcription factor activity
5	GO:0015631	tubulin binding	2	2.4	GO:0008092	cytoskeletal protein binding
5	GO:0015075	ion transmembrane transporter activity	10	2.38	GO:0022891	substrate-specific transmembrane transporter activity
5	GO:0051427	hormone receptor binding	7	2.26	GO:0005102	receptor binding
5	GO:0070011	peptidase activity, acting on L-amino acid peptides	4	2.23	GO:0008233	peptidase activity
3	GO:0004857	enzyme inhibitor activity	5	2.2	GO:0030234	enzyme regulator activity
8	GO:0015077	monovalent inorganic cation transmembrane transporter activity	6	2.13	GO:0022890	inorganic cation transmembrane transporter activity
7	GO:0005261	cation channel activity	5	2.11	GO:0008324, GO:0005216	cation transmembrane transporter activity, ion channel activity
6	GO:0016791	phosphatase activity	5	2.09	GO:0042578	phosphoric ester hydrolase activity
4	GO:0016788	hydrolase activity, acting on ester bonds	11	2.06	GO:0016787	hydrolase activity
5	GO:0030165	PDZ domain binding	2	2	GO:0019904	protein domain specific binding
8	GO:0030331	estrogen receptor binding	2	2	GO:0035258	steroid hormone receptor binding
7	GO:0004197	cysteine-type endopeptidase activity	2	2	GO:0008234, GO:0004175	cysteine-type peptidase activity, endopeptidase activity
4	GO:0030674	protein binding, bridging	2	2	GO:0005515, GO:0060090	protein binding, binding, bridging
6	GO:0001077	RNA polymerase II core promoter proximal region sequence-specific DNA binding transcription factor activity involved in positive regulation of transcription	2	2	GO:0001228, GO:0000982	RNA polymerase II transcription regulatory region sequence-specific DNA binding transcription factor activity involved in positive regulation of transcription, RNA polymerase II core promoter proximal region sequence-specific DNA binding transcription factor activity
5	GO:0019894	kinesin binding	2	2	GO:0008092	cytoskeletal protein binding
8	GO:0004683	calmodulin-dependent protein kinase activity	2	2	GO:0004674	protein serine/threonine kinase activity
6	GO:0030552	cAMP binding	2	2	GO:0030551, GO:0016208	cyclic nucleotide binding, AMP binding
6	GO:0008017	microtubule binding	2	2	GO:0015631	tubulin binding
7	GO:0003887	DNA-directed DNA polymerase activity	2	2	GO:0034061	DNA polymerase activity
9	GO:0005391	sodium:potassium-exchanging ATPase activity	2	2	GO:0015081, GO:0008556	sodium ion transmembrane transporter activity, potassium-transporting ATPase activity
8	GO:0004697	protein kinase C activity	2	2	GO:0004674	protein serine/threonine kinase activity
4	GO:0097110	scaffold protein binding	2	2	GO:0005515	protein binding
5	GO:0017091	AU-rich element binding	2	2	GO:0003723	RNA binding
5	GO:0031996	thioesterase binding	2	2	GO:0019899	enzyme binding
7	GO:0031435	mitogen-activated protein kinase kinase kinase binding	2	2	GO:0019901	protein kinase binding
3	GO:0043021	ribonucleoprotein complex binding	2	2	GO:0005488	binding
6	GO:0030374	ligand-dependent nuclear receptor transcription coactivator activity	2	2	GO:0003713	transcription coactivator activity
5	GO:0043425	bHLH transcription factor binding	2	2	GO:0008134	transcription factor binding
4	GO:0005518	collagen binding	2	2	GO:0005515	protein binding
7	GO:0070888	E-box binding	2	2	GO:0044212	transcription regulatory region DNA binding
4	GO:0019955	cytokine binding	2	2	GO:0005515	protein binding
5	GO:0003705	RNA polymerase II distal enhancer sequence-specific DNA binding transcription factor activity	2	2	GO:0000981	sequence-specific DNA binding RNA polymerase II transcription factor activity
3	GO:0008144	drug binding	2	2	GO:0005488	binding
6	GO:0001078	RNA polymerase II core promoter proximal region sequence-specific DNA binding transcription factor activity involved in negative regulation of transcription	2	2	GO:0001227, GO:0000982	RNA polymerase II transcription regulatory region sequence-specific DNA binding transcription factor activity involved in negative regulation of transcription, RNA polymerase II core promoter proximal region sequence-specific DNA binding transcription factor activity
6	GO:0003730	mRNA 3'-UTR binding	2	2	GO:0003729	mRNA binding
5	GO:0016922	ligand-dependent nuclear receptor binding	2	2	GO:0005102	receptor binding
6	GO:0004221	ubiquitin thiolesterase activity	2	2	GO:0016790	thiolester hydrolase activity
6	GO:0005547	phosphatidylinositol-3,4,5-trisphosphate binding	2	2	GO:0035091	phosphatidylinositol binding
5	GO:0003725	double-stranded RNA binding	2	2	GO:0003723	RNA binding
5	GO:0005178	integrin binding	2	2	GO:0032403, GO:0005102	protein complex binding, receptor binding
6	GO:0001102	RNA polymerase II activating transcription factor binding	2	2	GO:0001085, GO:0033613	RNA polymerase II transcription factor binding, activating transcription factor binding
8	GO:0004843	ubiquitin-specific protease activity	2	2	GO:0019783	small conjugating protein-specific protease activity
9	GO:0004115	3',5'-cyclic-AMP phosphodiesterase activity	2	2	GO:0004114	3',5'-cyclic-nucleotide phosphodiesterase activity
6	GO:0003746	translation elongation factor activity	2	2	GO:0008135	translation factor activity, nucleic acid binding
5	GO:0042169	SH2 domain binding	2	2	GO:0019904	protein domain specific binding
7	GO:0046873	metal ion transmembrane transporter activity	7	1.99	GO:0008324	cation transmembrane transporter activity
4	GO:0022891	substrate-specific transmembrane transporter activity	12	1.99	GO:0022892, GO:0022857	substrate-specific transporter activity, transmembrane transporter activity
5	GO:0003727	single-stranded RNA binding	3	1.96	GO:0003723	RNA binding
3	GO:0042277	peptide binding	3	1.96	GO:0005488	binding
5	GO:0001664	G-protein coupled receptor binding	4	1.94	GO:0005102	receptor binding
6	GO:0008234	cysteine-type peptidase activity	3	1.92	GO:0070011	peptidase activity, acting on L-amino acid peptides
5	GO:0005126	cytokine receptor binding	5	1.9	GO:0005102	receptor binding
6	GO:0004175	endopeptidase activity	3	1.8	GO:0070011	peptidase activity, acting on L-amino acid peptides
6	GO:0008324	cation transmembrane transporter activity	8	1.68	GO:0015075	ion transmembrane transporter activity
4	GO:0016817	hydrolase activity, acting on acid anhydrides	15	1.68	GO:0016787	hydrolase activity
3	GO:0016874	ligase activity	6	1.65	GO:0003824	catalytic activity
7	GO:0022890	inorganic cation transmembrane transporter activity	8	1.62	GO:0008324	cation transmembrane transporter activity
4	GO:0004879	ligand-activated sequence-specific DNA binding RNA polymerase II transcription factor activity	2	1.6	GO:0000981, GO:0038023	sequence-specific DNA binding RNA polymerase II transcription factor activity, signaling receptor activity
8	GO:0005262	calcium channel activity	2	1.6	GO:0015085, GO:0005261	calcium ion transmembrane transporter activity, cation channel activity
4	GO:0034185	apolipoprotein binding	2	1.6	GO:0005515	protein binding
9	GO:0005249	voltage-gated potassium channel activity	2	1.6	GO:0005267, GO:0022843	potassium channel activity, voltage-gated cation channel activity
4	GO:0003707	steroid hormone receptor activity	2	1.6	GO:0038023	signaling receptor activity
5	GO:0000339	RNA cap binding	2	1.6	GO:0003723	RNA binding
4	GO:0031491	nucleosome binding	2	1.6	GO:0003682	chromatin binding
7	GO:0045236	CXCR chemokine receptor binding	2	1.6	GO:0042379	chemokine receptor binding
5	GO:0051287	NAD binding	2	1.6	GO:0000166, GO:0050662	nucleotide binding, coenzyme binding
3	GO:0042562	hormone binding	2	1.6	GO:0005488	binding
5	GO:0005539	glycosaminoglycan binding	2	1.6	GO:0030247	polysaccharide binding
5	GO:0051020	GTPase binding	2	1.6	GO:0019899	enzyme binding
5	GO:0019905	syntaxin binding	2	1.6	GO:0000149	SNARE binding
7	GO:0004714	transmembrane receptor protein tyrosine kinase activity	3	1.56	GO:0004713, GO:0019199	protein tyrosine kinase activity, transmembrane receptor protein kinase activity
7	GO:0001159	core promoter proximal region DNA binding	3	1.56	GO:0044212	transcription regulatory region DNA binding
4	GO:0050662	coenzyme binding	2	1.56	GO:0048037	cofactor binding
8	GO:0015081	sodium ion transmembrane transporter activity	3	1.56	GO:0046873, GO:0015077	metal ion transmembrane transporter activity, monovalent inorganic cation transmembrane transporter activity
8	GO:0022843	voltage-gated cation channel activity	3	1.56	GO:0005261, GO:0005244	cation channel activity, voltage-gated ion channel activity
5	GO:0042578	phosphoric ester hydrolase activity	7	1.51	GO:0016788	hydrolase activity, acting on ester bonds
8	GO:0015079	potassium ion transmembrane transporter activity	4	1.51	GO:0046873, GO:0015077	metal ion transmembrane transporter activity, monovalent inorganic cation transmembrane transporter activity
5	GO:0022838	substrate-specific channel activity	6	1.5	GO:0022891, GO:0015267	substrate-specific transmembrane transporter activity, channel activity
6	GO:0022836	gated channel activity	4	1.51	GO:0015267	channel activity
5	GO:0016881	acid-amino acid ligase activity	4	1.44	GO:0016879	ligase activity, forming carbon-nitrogen bonds
3	GO:0019207	kinase regulator activity	4	1.45	GO:0030234	enzyme regulator activity
4	GO:0019887	protein kinase regulator activity	3	1.42	GO:0019207	kinase regulator activity
7	GO:0022839	ion gated channel activity	2	1.36	GO:0022836	gated channel activity
5	GO:0004860	protein kinase inhibitor activity	2	1.36	GO:0019210, GO:0019887	kinase inhibitor activity, protein kinase regulator activity
4	GO:0005496	steroid binding	2	1.36	GO:0008289	lipid binding
5	GO:0004930	G-protein coupled receptor activity	2	1.36	GO:0004888	transmembrane signaling receptor activity
4	GO:0008233	peptidase activity	4	1.34	GO:0016787	hydrolase activity
8	GO:0005267	potassium channel activity	2	1.32	GO:0015079, GO:0005261	potassium ion transmembrane transporter activity, cation channel activity
3	GO:0008047	enzyme activator activity	3	1.32	GO:0030234	enzyme regulator activity
5	GO:0015267	channel activity	6	1.26	GO:0022803	passive transmembrane transporter activity
5	GO:0005085	guanyl-nucleotide exchange factor activity	2	1.22	GO:0030695	GTPase regulator activity
5	GO:0008168	methyltransferase activity	2	1.22	GO:0016741	transferase activity, transferring one-carbon groups
8	GO:0004386	helicase activity	2	1.22	GO:0017111	nucleoside-triphosphatase activity
8	GO:0004114	3',5'-cyclic-nucleotide phosphodiesterase activity	2	1.2	GO:0004112	cyclic-nucleotide phosphodiesterase activity
5	GO:0004702	receptor signaling protein serine/threonine kinase activity	2	1.2	GO:0004674, GO:0005057	protein serine/threonine kinase activity, receptor signaling protein activity
4	GO:0030228	lipoprotein particle receptor activity	1	1.2	GO:0038024	cargo receptor activity
8	GO:0016208	AMP binding	2	1.2	GO:0032559	adenyl ribonucleotide binding
8	GO:0008556	potassium-transporting ATPase activity	2	1.2	GO:0015079, GO:0015662	potassium ion transmembrane transporter activity, ATPase activity, coupled to transmembrane movement of ions, phosphorylative mechanism
7	GO:0019783	small conjugating protein-specific protease activity	2	1.2	GO:0008234	cysteine-type peptidase activity
5	GO:0015291	secondary active transmembrane transporter activity	1	1.2	GO:0022804	active transmembrane transporter activity
5	GO:0016836	hydro-lyase activity	1	1.2	GO:0016835	carbon-oxygen lyase activity
3	GO:0060090	binding, bridging	2	1.2	GO:0005488	binding
5	GO:0030551	cyclic nucleotide binding	2	1.2	GO:0000166	nucleotide binding
5	GO:0016790	thiolester hydrolase activity	2	1.2	GO:0016788	hydrolase activity, acting on ester bonds
5	GO:0016616	oxidoreductase activity, acting on the CH-OH group of donors, NAD or NADP as acceptor	1	1.2	GO:0016614	oxidoreductase activity, acting on CH-OH group of donors
6	GO:0034061	DNA polymerase activity	2	1.2	GO:0016779	nucleotidyltransferase activity
5	GO:0070851	growth factor receptor binding	2	1.2	GO:0005102	receptor binding
4	GO:0003916	DNA topoisomerase activity	1	1.2	GO:0016853, GO:0003677	isomerase activity, DNA binding
5	GO:0001227	RNA polymerase II transcription regulatory region sequence-specific DNA binding transcription factor activity involved in negative regulation of transcription	2	1.2	GO:0000981	sequence-specific DNA binding RNA polymerase II transcription factor activity
5	GO:0033613	activating transcription factor binding	2	1.2	GO:0008134	transcription factor binding
2	GO:0016247	channel regulator activity	2	1.2	GO:0003674	molecular_function
6	GO:0034483	heparan sulfate sulfotransferase activity	1	1.2	GO:0008146	sulfotransferase activity
6	GO:0008238	exopeptidase activity	1	1.2	GO:0070011	peptidase activity, acting on L-amino acid peptides
7	GO:0015276	ligand-gated ion channel activity	2	1.2	GO:0022834, GO:0005216	ligand-gated channel activity, ion channel activity
9	GO:0015078	hydrogen ion transmembrane transporter activity	1	1.2	GO:0015077	monovalent inorganic cation transmembrane transporter activity
8	GO:0000977	RNA polymerase II regulatory region sequence-specific DNA binding	2	1.2	GO:0001012, GO:0000976	RNA polymerase II regulatory region DNA binding, transcription regulatory region sequence-specific DNA binding
5	GO:0001228	RNA polymerase II transcription regulatory region sequence-specific DNA binding transcription factor activity involved in positive regulation of transcription	2	1.2	GO:0000981	sequence-specific DNA binding RNA polymerase II transcription factor activity
3	GO:0030246	carbohydrate binding	3	1.18	GO:0005488	binding
3	GO:0016853	isomerase activity	3	1.15	GO:0003824	catalytic activity
4	GO:0030695	GTPase regulator activity	3	1.09	GO:0060589	nucleoside-triphosphatase regulator activity
6	GO:0008509	anion transmembrane transporter activity	1	1	GO:0015075	ion transmembrane transporter activity
9	GO:0004445	inositol-polyphosphate 5-phosphatase activity	1	1	GO:0046030	inositol trisphosphate phosphatase activity
8	GO:0019003	GDP binding	1	1	GO:0032561	guanyl ribonucleotide binding
4	GO:0030742	GTP-dependent protein binding	1	1	GO:0005515	protein binding
8	GO:0001158	enhancer sequence-specific DNA binding	1	1	GO:0035326, GO:0000976	enhancer binding, transcription regulatory region sequence-specific DNA binding
6	GO:0048487	beta-tubulin binding	1	1	GO:0015631	tubulin binding
5	GO:0003917	DNA topoisomerase type I activity	1	1	GO:0003916	DNA topoisomerase activity
5	GO:0035197	siRNA binding	1	1	GO:0003723	RNA binding
7	GO:0051721	protein phosphatase 2A binding	1	1	GO:0019903	protein phosphatase binding
5	GO:0048156	tau protein binding	1	1	GO:0008092	cytoskeletal protein binding
6	GO:0004750	ribulose-phosphate 3-epimerase activity	1	1	GO:0016857	racemase and epimerase activity, acting on carbohydrates and derivatives
7	GO:0008432	JUN kinase binding	1	1	GO:0019901	protein kinase binding
6	GO:0030617	transforming growth factor beta receptor, inhibitory cytoplasmic mediator activity	1	1	GO:0005072	transforming growth factor beta receptor, cytoplasmic mediator activity
5	GO:0005544	calcium-dependent phospholipid binding	1	1	GO:0005543	phospholipid binding
3	GO:0017080	sodium channel regulator activity	1	1	GO:0016247	channel regulator activity
6	GO:0017127	cholesterol transporter activity	1	1	GO:0015248	sterol transporter activity
5	GO:0034437	glycoprotein transporter activity	1	1	GO:0008565	protein transporter activity
6	GO:0003697	single-stranded DNA binding	1	1	GO:0043566	structure-specific DNA binding
8	GO:0005005	transmembrane-ephrin receptor activity	1	1	GO:0005003	ephrin receptor activity
5	GO:0038025	reelin receptor activity	1	1	GO:0004888	transmembrane signaling receptor activity
5	GO:0002020	protease binding	1	1	GO:0019899	enzyme binding
6	GO:0004300	enoyl-CoA hydratase activity	1	1	GO:0016836	hydro-lyase activity
6	GO:0004709	MAP kinase kinase kinase activity	1	1	GO:0004702	receptor signaling protein serine/threonine kinase activity
5	GO:0071837	HMG box domain binding	1	1	GO:0019904	protein domain specific binding
6	GO:0051428	peptide hormone receptor binding	1	1	GO:0051427	hormone receptor binding
5	GO:0035035	histone acetyltransferase binding	1	1	GO:0019899	enzyme binding
4	GO:0043499	eukaryotic cell surface binding	1	1	GO:0043498	cell surface binding
6	GO:0050544	arachidonic acid binding	1	1	GO:0050543, GO:0036041	icosatetraenoic acid binding, long-chain fatty acid binding
5	GO:0003918	DNA topoisomerase (ATP-hydrolyzing) activity	1	1	GO:0008094, GO:0003916	DNA-dependent ATPase activity, DNA topoisomerase activity
4	GO:0035014	phosphatidylinositol 3-kinase regulator activity	1	1	GO:0019207	kinase regulator activity
9	GO:0060072	large conductance calcium-activated potassium channel activity	1	1	GO:0015269	calcium-activated potassium channel activity
6	GO:0015293	symporter activity	1	1	GO:0015291	secondary active transmembrane transporter activity
8	GO:0008198	ferrous iron binding	1	1	GO:0005506	iron ion binding
5	GO:0000993	RNA polymerase II core binding	1	1	GO:0043175, GO:0032403, GO:0001099	RNA polymerase core enzyme binding, protein complex binding, basal RNA polymerase II transcription machinery binding
5	GO:0017022	myosin binding	1	1	GO:0008092	cytoskeletal protein binding
7	GO:0004897	ciliary neurotrophic factor receptor activity	1	1	GO:0004896	cytokine receptor activity
8	GO:0005242	inward rectifier potassium channel activity	1	1	GO:0015276, GO:0005249	ligand-gated ion channel activity, voltage-gated potassium channel activity
8	GO:0000979	RNA polymerase II core promoter sequence-specific DNA binding	1	1	GO:0001046, GO:0000977	core promoter sequence-specific DNA binding, RNA polymerase II regulatory region sequence-specific DNA binding
7	GO:0004861	cyclin-dependent protein kinase inhibitor activity	1	1	GO:0030291, GO:0016538	protein serine/threonine kinase inhibitor activity, cyclin-dependent protein kinase regulator activity
5	GO:0050699	WW domain binding	1	1	GO:0019904	protein domain specific binding
5	GO:0005158	insulin receptor binding	1	1	GO:0032403, GO:0005102	protein complex binding, receptor binding
7	GO:0034713	type I transforming growth factor beta receptor binding	1	1	GO:0005160	transforming growth factor beta receptor binding
5	GO:0017134	fibroblast growth factor binding	1	1	GO:0019838	growth factor binding
4	GO:0017046	peptide hormone binding	1	1	GO:0042277, GO:0042562	peptide binding, hormone binding
6	GO:0005149	interleukin-1 receptor binding	1	1	GO:0070851, GO:0005126	growth factor receptor binding, cytokine receptor binding
7	GO:0003831	beta-N-acetylglucosaminylglycopeptide beta-1,4-galactosyltransferase activity	1	1	GO:0035250	UDP-galactosyltransferase activity
6	GO:0004704	NF-kappaB-inducing kinase activity	1	1	GO:0004702	receptor signaling protein serine/threonine kinase activity
5	GO:0000062	fatty-acyl-CoA binding	1	1	GO:0050662	coenzyme binding
8	GO:0051718	DNA (cytosine-5-)-methyltransferase activity, acting on CpG substrates	1	1	GO:0003886	DNA (cytosine-5-)-methyltransferase activity
7	GO:0031858	pituitary adenylate cyclase-activating polypeptide receptor binding	1	1	GO:0071855	neuropeptide receptor binding
3	GO:0030371	translation repressor activity	1	1	GO:0045182	translation regulator activity
6	GO:0005161	platelet-derived growth factor receptor binding	1	1	GO:0070851	growth factor receptor binding
7	GO:0005080	protein kinase C binding	1	1	GO:0019901	protein kinase binding
5	GO:0042813	Wnt-activated receptor activity	1	1	GO:0004888	transmembrane signaling receptor activity
7	GO:0009922	fatty acid elongase activity	1	1	GO:0004312	fatty acid synthase activity
6	GO:0043014	alpha-tubulin binding	1	1	GO:0015631	tubulin binding
5	GO:0046966	thyroid hormone receptor binding	1	1	GO:0008134, GO:0035257	transcription factor binding, nuclear hormone receptor binding
7	GO:0045028	G-protein coupled purinergic nucleotide receptor activity	1	1	GO:0001608, GO:0001614	G-protein coupled nucleotide receptor activity, purinergic nucleotide receptor activity
6	GO:0005184	neuropeptide hormone activity	1	1	GO:0005179	hormone activity
7	GO:0005507	copper ion binding	1	1	GO:0046914	transition metal ion binding
9	GO:0004723	calcium-dependent protein serine/threonine phosphatase activity	1	1	GO:0004722	protein serine/threonine phosphatase activity
4	GO:0051219	phosphoprotein binding	1	1	GO:0005515	protein binding
6	GO:0016508	long-chain-enoyl-CoA hydratase activity	1	1	GO:0016836	hydro-lyase activity
3	GO:0050840	extracellular matrix binding	1	1	GO:0005488	binding
4	GO:0034188	apolipoprotein A-I receptor activity	1	1	GO:0030226, GO:0004888	apolipoprotein receptor activity, transmembrane signaling receptor activity
4	GO:0048029	monosaccharide binding	1	1	GO:0030246	carbohydrate binding
7	GO:0000400	four-way junction DNA binding	1	1	GO:0000217	DNA secondary structure binding
7	GO:0005007	fibroblast growth factor-activated receptor activity	1	1	GO:0004714	transmembrane receptor protein tyrosine kinase activity
4	GO:0030276	clathrin binding	1	1	GO:0005515	protein binding
9	GO:0004438	phosphatidylinositol-3-phosphatase activity	1	1	GO:0052744	phosphatidylinositol monophosphate phosphatase activity
5	GO:0031370	eukaryotic initiation factor 4G binding	1	1	GO:0031369	translation initiation factor binding
7	GO:0005123	death receptor binding	1	1	GO:0032813	tumor necrosis factor receptor superfamily binding
9	GO:0005245	voltage-gated calcium channel activity	1	1	GO:0005262, GO:0022843	calcium channel activity, voltage-gated cation channel activity
8	GO:0005153	interleukin-8 receptor binding	1	1	GO:0045236	CXCR chemokine receptor binding
6	GO:0030350	iron-responsive element binding	1	1	GO:0003729	mRNA binding
6	GO:0005546	phosphatidylinositol-4,5-bisphosphate binding	1	1	GO:0035091	phosphatidylinositol binding
5	GO:0030295	protein kinase activator activity	1	1	GO:0019209, GO:0019887	kinase activator activity, protein kinase regulator activity
3	GO:0005246	calcium channel regulator activity	1	1	GO:0016247	channel regulator activity
4	GO:0016176	superoxide-generating NADPH oxidase activator activity	1	1	GO:0008047	enzyme activator activity
6	GO:0008143	poly(A) RNA binding	1	1	GO:0070717, GO:0003729	poly-purine tract binding, mRNA binding
5	GO:0036002	pre-mRNA binding	1	1	GO:0003723	RNA binding
5	GO:0034189	very-low-density lipoprotein particle binding	1	1	GO:0071813	lipoprotein particle binding
6	GO:0045322	unmethylated CpG binding	1	1	GO:0043565	sequence-specific DNA binding
5	GO:0030544	Hsp70 protein binding	1	1	GO:0031072	heat shock protein binding
4	GO:0043027	cysteine-type endopeptidase inhibitor activity involved in apoptotic process	1	1	GO:0043028, GO:0004869	cysteine-type endopeptidase regulator activity involved in apoptotic process, cysteine-type endopeptidase inhibitor activity
4	GO:0004497	monooxygenase activity	1	1	GO:0016491	oxidoreductase activity
5	GO:0051864	histone demethylase activity (H3-K36 specific)	1	1	GO:0032452, GO:0016706	histone demethylase activity, oxidoreductase activity, acting on paired donors, with incorporation or reduction of molecular oxygen, 2-oxoglutarate as one donor, and incorporation of one atom each of oxygen into both donors
5	GO:0004478	methionine adenosyltransferase activity	1	1	GO:0016765	transferase activity, transferring alkyl or aryl (other than methyl) groups
5	GO:0030275	LRR domain binding	1	1	GO:0019904	protein domain specific binding
8	GO:0070699	type II activin receptor binding	1	1	GO:0070697	activin receptor binding
5	GO:0008139	nuclear localization sequence binding	1	1	GO:0005048	signal sequence binding
6	GO:0008187	poly-pyrimidine tract binding	1	1	GO:0003727	single-stranded RNA binding
5	GO:0005159	insulin-like growth factor receptor binding	1	1	GO:0005102	receptor binding
7	GO:0033871	[heparan sulfate]-glucosamine 3-sulfotransferase 2 activity	1	1	GO:0034483	heparan sulfate sulfotransferase activity
6	GO:0017082	mineralocorticoid receptor activity	1	1	GO:0004879, GO:0003707	ligand-activated sequence-specific DNA binding RNA polymerase II transcription factor activity, steroid hormone receptor activity
9	GO:0070551	endoribonuclease activity, cleaving siRNA-paired mRNA	1	1	GO:0016891	endoribonuclease activity, producing 5'-phosphomonoesters
6	GO:0008201	heparin binding	1	1	GO:0005539	glycosaminoglycan binding
5	GO:0008046	axon guidance receptor activity	1	1	GO:0004888	transmembrane signaling receptor activity
8	GO:0030676	Rac guanyl-nucleotide exchange factor activity	1	1	GO:0005089	Rho guanyl-nucleotide exchange factor activity
6	GO:0000340	RNA 7-methylguanosine cap binding	1	1	GO:0000339	RNA cap binding
6	GO:0043548	phosphatidylinositol 3-kinase binding	1	1	GO:0019900	kinase binding
6	GO:0004385	guanylate kinase activity	1	1	GO:0019201, GO:0016776	nucleotide kinase activity, phosphotransferase activity, phosphate group as acceptor
5	GO:0005099	Ras GTPase activator activity	1	1	GO:0005083, GO:0005096	small GTPase regulator activity, GTPase activator activity
6	GO:0060961	phospholipase D inhibitor activity	1	1	GO:0004859	phospholipase inhibitor activity
4	GO:0055106	ubiquitin-protein ligase regulator activity	1	1	GO:0055103	ligase regulator activity
6	GO:0070403	NAD+ binding	1	1	GO:0051287	NAD binding
5	GO:0034186	apolipoprotein A-I binding	1	1	GO:0034185	apolipoprotein binding
4	GO:0071889	14-3-3 protein binding	1	1	GO:0005515	protein binding
8	GO:0046969	NAD-dependent histone deacetylase activity (H3-K9 specific)	1	1	GO:0032129, GO:0017136	histone deacetylase activity (H3-K9 specific), NAD-dependent histone deacetylase activity
6	GO:0016509	long-chain-3-hydroxyacyl-CoA dehydrogenase activity	1	1	GO:0016616	oxidoreductase activity, acting on the CH-OH group of donors, NAD or NADP as acceptor
9	GO:0042624	ATPase activity, uncoupled	1	1	GO:0016887	ATPase activity
5	GO:0051539	4 iron, 4 sulfur cluster binding	1	1	GO:0051536	iron-sulfur cluster binding
4	GO:0042043	neurexin family protein binding	1	1	GO:0005515	protein binding
7	GO:0004177	aminopeptidase activity	1	1	GO:0008238	exopeptidase activity
4	GO:0002039	p53 binding	1	1	GO:0005515	protein binding
4	GO:0017147	Wnt-protein binding	1	1	GO:0005515	protein binding
6	GO:0050750	low-density lipoprotein particle receptor binding	1	1	GO:0070325	lipoprotein particle receptor binding
8	GO:0008811	chloramphenicol O-acetyltransferase activity	1	1	GO:0016413	O-acetyltransferase activity
7	GO:0008467	[heparan sulfate]-glucosamine 3-sulfotransferase 1 activity	1	1	GO:0034483	heparan sulfate sulfotransferase activity
7	GO:0004180	carboxypeptidase activity	1	1	GO:0008238	exopeptidase activity
5	GO:0030506	ankyrin binding	1	1	GO:0008092	cytoskeletal protein binding
6	GO:0003950	NAD+ ADP-ribosyltransferase activity	1	1	GO:0016763	transferase activity, transferring pentosyl groups
5	GO:0005548	phospholipid transporter activity	1	1	GO:0005319	lipid transporter activity
6	GO:0001103	RNA polymerase II repressing transcription factor binding	1	1	GO:0001085, GO:0070491	RNA polymerase II transcription factor binding, repressing transcription factor binding
6	GO:0004615	phosphomannomutase activity	1	1	GO:0016868	intramolecular transferase activity, phosphotransferases
5	GO:0070411	I-SMAD binding	1	1	GO:0046332	SMAD binding
5	GO:0043274	phospholipase binding	1	1	GO:0019899	enzyme binding
4	GO:0051861	glycolipid binding	1	1	GO:0008289	lipid binding
8	GO:0035259	glucocorticoid receptor binding	1	1	GO:0035258	steroid hormone receptor binding
5	GO:0016702	oxidoreductase activity, acting on single donors with incorporation of molecular oxygen, incorporation of two atoms of oxygen	1	1	GO:0016701, GO:0051213	oxidoreductase activity, acting on single donors with incorporation of molecular oxygen, dioxygenase activity
6	GO:0004252	serine-type endopeptidase activity	1	1	GO:0008236, GO:0004175	serine-type peptidase activity, endopeptidase activity
8	GO:0000978	RNA polymerase II core promoter proximal region sequence-specific DNA binding	1	1	GO:0000977, GO:0000987	RNA polymerase II regulatory region sequence-specific DNA binding, core promoter proximal region sequence-specific DNA binding
5	GO:0048185	activin binding	1	1	GO:0032403	protein complex binding
6	GO:0015485	cholesterol binding	1	1	GO:0032934	sterol binding
5	GO:0043398	HLH domain binding	1	1	GO:0019904	protein domain specific binding
6	GO:0016521	pituitary adenylate cyclase activating polypeptide activity	1	1	GO:0005179	hormone activity
9	GO:0003777	microtubule motor activity	1	1	GO:0003774	motor activity
6	GO:0017070	U6 snRNA binding	1	1	GO:0017069	snRNA binding
8	GO:0015280	ligand-gated sodium channel activity	1	1	GO:0005272, GO:0015276	sodium channel activity, ligand-gated ion channel activity
5	GO:0004864	protein phosphatase inhibitor activity	1	1	GO:0019888, GO:0019212	protein phosphatase regulator activity, phosphatase inhibitor activity
5	GO:0005041	low-density lipoprotein receptor activity	1	1	GO:0030228	lipoprotein particle receptor activity
6	GO:0015349	thyroid hormone transmembrane transporter activity	1	1	GO:0015291, GO:0072349	secondary active transmembrane transporter activity, modified amino acid transmembrane transporter activity
5	GO:0019843	rRNA binding	1	1	GO:0003723	RNA binding
7	GO:0051019	mitogen-activated protein kinase binding	1	1	GO:0019901	protein kinase binding
4	GO:0044325	ion channel binding	1	1	GO:0005515	protein binding
8	GO:0046961	proton-transporting ATPase activity, rotational mechanism	1	1	GO:0019829, GO:0015078	cation-transporting ATPase activity, hydrogen ion transmembrane transporter activity
7	GO:0008028	monocarboxylic acid transmembrane transporter activity	1	1	GO:0046943	carboxylic acid transmembrane transporter activity
5	GO:0030229	very-low-density lipoprotein particle receptor activity	1	1	GO:0030228	lipoprotein particle receptor activity
4	GO:0070064	proline-rich region binding	1	1	GO:0005515	protein binding
6	GO:0003857	3-hydroxyacyl-CoA dehydrogenase activity	1	1	GO:0016616	oxidoreductase activity, acting on the CH-OH group of donors, NAD or NADP as acceptor
6	GO:0017075	syntaxin-1 binding	1	1	GO:0019905	syntaxin binding
5	GO:0000049	tRNA binding	1	1	GO:0003723	RNA binding
5	GO:0005125	cytokine activity	1	1	GO:0005102	receptor binding
10	GO:0046933	hydrogen ion transporting ATP synthase activity, rotational mechanism	1	1	GO:0015078	hydrogen ion transmembrane transporter activity
6	GO:0004091	carboxylesterase activity	1	1	GO:0052689	carboxylic ester hydrolase activity
8	GO:0004725	protein tyrosine phosphatase activity	1	1	GO:0004721	phosphoprotein phosphatase activity
7	GO:0005021	vascular endothelial growth factor-activated receptor activity	1	1	GO:0004714	transmembrane receptor protein tyrosine kinase activity
8	GO:0004715	non-membrane spanning protein tyrosine kinase activity	1	1	GO:0004713	protein tyrosine kinase activity
9	GO:0035403	histone kinase activity (H3-T6 specific)	1	1	GO:0035184	histone threonine kinase activity
7	GO:0004831	tyrosine-tRNA ligase activity	1	1	GO:0004812	aminoacyl-tRNA ligase activity
5	GO:0031492	nucleosomal DNA binding	1	1	GO:0031490, GO:0031491	chromatin DNA binding, nucleosome binding
4	GO:0045502	dynein binding	1	1	GO:0005515	protein binding
6	GO:0043325	phosphatidylinositol-3,4-bisphosphate binding	1	1	GO:0035091	phosphatidylinositol binding
6	GO:0031267	small GTPase binding	1	1	GO:0051020	GTPase binding
10	GO:0004004	ATP-dependent RNA helicase activity	1	1	GO:0008026, GO:0008186, GO:0003724	ATP-dependent helicase activity, RNA-dependent ATPase activity, RNA helicase activity
7	GO:0003988	acetyl-CoA C-acyltransferase activity	1	1	GO:0016408	C-acyltransferase activity
5	GO:0017154	semaphorin receptor activity	1	1	GO:0004888	transmembrane signaling receptor activity
7	GO:0051033	RNA transmembrane transporter activity	1	1	GO:0051032	nucleic acid transmembrane transporter activity
4	GO:0051213	dioxygenase activity	1	0.96	GO:0016491	oxidoreductase activity
4	GO:0030247	polysaccharide binding	2	0.96	GO:0001871, GO:0030246	pattern binding, carbohydrate binding
8	GO:0015085	calcium ion transmembrane transporter activity	2	0.96	GO:0046873, GO:0072509	metal ion transmembrane transporter activity, divalent inorganic cation transmembrane transporter activity
6	GO:0042379	chemokine receptor binding	2	0.96	GO:0001664, GO:0005126	G-protein coupled receptor binding, cytokine receptor binding
4	GO:0005319	lipid transporter activity	1	0.96	GO:0022892	substrate-specific transporter activity
4	GO:0000149	SNARE binding	2	0.96	GO:0005515	protein binding
7	GO:0005244	voltage-gated ion channel activity	3	0.94	GO:0022832, GO:0005216	voltage-gated channel activity, ion channel activity
5	GO:0016747	transferase activity, transferring acyl groups other than amino-acyl groups	3	0.94	GO:0016746	transferase activity, transferring acyl groups
3	GO:0048037	cofactor binding	2	0.94	GO:0005488	binding
5	GO:0019199	transmembrane receptor protein kinase activity	3	0.94	GO:0004672, GO:0004888	protein kinase activity, transmembrane signaling receptor activity
9	GO:0042623	ATPase activity, coupled	5	0.89	GO:0016887	ATPase activity
4	GO:0016879	ligase activity, forming carbon-nitrogen bonds	4	0.86	GO:0016874	ligase activity
6	GO:0046943	carboxylic acid transmembrane transporter activity	1	0.82	GO:0005342	organic acid transmembrane transporter activity
4	GO:0022804	active transmembrane transporter activity	4	0.82	GO:0022857	transmembrane transporter activity
4	GO:0019210	kinase inhibitor activity	2	0.82	GO:0004857, GO:0019207	enzyme inhibitor activity, kinase regulator activity
5	GO:0005083	small GTPase regulator activity	2	0.82	GO:0030695	GTPase regulator activity
6	GO:0042625	ATPase activity, coupled to transmembrane movement of ions	3	0.79	GO:0015075, GO:0042626	ion transmembrane transporter activity, ATPase activity, coupled to transmembrane movement of substances
4	GO:0022803	passive transmembrane transporter activity	6	0.76	GO:0022857	transmembrane transporter activity
7	GO:0015662	ATPase activity, coupled to transmembrane movement of ions, phosphorylative mechanism	2	0.72	GO:0042625	ATPase activity, coupled to transmembrane movement of ions
3	GO:0038024	cargo receptor activity	1	0.72	GO:0004872	receptor activity
5	GO:0008146	sulfotransferase activity	1	0.72	GO:0016782	transferase activity, transferring sulfur-containing groups
4	GO:0016741	transferase activity, transferring one-carbon groups	2	0.73	GO:0016740	transferase activity
7	GO:0022834	ligand-gated channel activity	2	0.72	GO:0022836	gated channel activity
5	GO:0016779	nucleotidyltransferase activity	2	0.72	GO:0016772	transferase activity, transferring phosphorus-containing groups
4	GO:0016614	oxidoreductase activity, acting on CH-OH group of donors	1	0.72	GO:0016491	oxidoreductase activity
7	GO:0004112	cyclic-nucleotide phosphodiesterase activity	2	0.72	GO:0008081	phosphoric diester hydrolase activity
4	GO:0016835	carbon-oxygen lyase activity	1	0.72	GO:0016829	lyase activity
7	GO:0001012	RNA polymerase II regulatory region DNA binding	2	0.72	GO:0044212	transcription regulatory region DNA binding
3	GO:0060589	nucleoside-triphosphatase regulator activity	3	0.65	GO:0030234	enzyme regulator activity
5	GO:0001099	basal RNA polymerase II transcription machinery binding	1	0.6	GO:0001098	basal transcription machinery binding
3	GO:0055103	ligase regulator activity	1	0.6	GO:0030234	enzyme regulator activity
4	GO:0031369	translation initiation factor binding	1	0.6	GO:0005515	protein binding
7	GO:0072349	modified amino acid transmembrane transporter activity	1	0.6	GO:0015171	amino acid transmembrane transporter activity
5	GO:0016538	cyclin-dependent protein kinase regulator activity	1	0.6	GO:0019887	protein kinase regulator activity
6	GO:0019903	protein phosphatase binding	1	0.6	GO:0019902	phosphatase binding
5	GO:0008236	serine-type peptidase activity	1	0.6	GO:0017171, GO:0070011	serine hydrolase activity, peptidase activity, acting on L-amino acid peptides
5	GO:0016776	phosphotransferase activity, phosphate group as acceptor	1	0.6	GO:0016772	transferase activity, transferring phosphorus-containing groups
6	GO:0005160	transforming growth factor beta receptor binding	1	0.6	GO:0005126	cytokine receptor binding
7	GO:0019201	nucleotide kinase activity	1	0.6	GO:0019205	nucleobase-containing compound kinase activity
6	GO:0035250	UDP-galactosyltransferase activity	1	0.6	GO:0008194, GO:0008378	UDP-glycosyltransferase activity, galactosyltransferase activity
5	GO:0017069	snRNA binding	1	0.6	GO:0003723	RNA binding
7	GO:0005003	ephrin receptor activity	1	0.6	GO:0004714	transmembrane receptor protein tyrosine kinase activity
8	GO:0003774	motor activity	1	0.6	GO:0017111	nucleoside-triphosphatase activity
9	GO:0003724	RNA helicase activity	1	0.6	GO:0004386	helicase activity
7	GO:0005089	Rho guanyl-nucleotide exchange factor activity	1	0.6	GO:0005088	Ras guanyl-nucleotide exchange factor activity
5	GO:0004896	cytokine receptor activity	1	0.6	GO:0004888	transmembrane signaling receptor activity
4	GO:0019209	kinase activator activity	1	0.6	GO:0008047, GO:0019207	enzyme activator activity, kinase regulator activity
5	GO:0070491	repressing transcription factor binding	1	0.6	GO:0008134	transcription factor binding
6	GO:0051032	nucleic acid transmembrane transporter activity	1	0.6	GO:0015932	nucleobase-containing compound transmembrane transporter activity
4	GO:0019212	phosphatase inhibitor activity	1	0.6	GO:0019208, GO:0004857	phosphatase regulator activity, enzyme inhibitor activity
8	GO:0001046	core promoter sequence-specific DNA binding	1	0.6	GO:0001047, GO:0000976	core promoter binding, transcription regulatory region sequence-specific DNA binding
4	GO:0031490	chromatin DNA binding	1	0.6	GO:0043566, GO:0003682	structure-specific DNA binding, chromatin binding
5	GO:0016763	transferase activity, transferring pentosyl groups	1	0.6	GO:0016757	transferase activity, transferring glycosyl groups
6	GO:0032813	tumor necrosis factor receptor superfamily binding	1	0.6	GO:0005126	cytokine receptor binding
6	GO:0016408	C-acyltransferase activity	1	0.6	GO:0016747	transferase activity, transferring acyl groups other than amino-acyl groups
6	GO:0030291	protein serine/threonine kinase inhibitor activity	1	0.6	GO:0004860	protein kinase inhibitor activity
2	GO:0045182	translation regulator activity	1	0.6	GO:0003674	molecular_function
6	GO:0050543	icosatetraenoic acid binding	1	0.6	GO:0050542	icosanoid binding
6	GO:0000217	DNA secondary structure binding	1	0.6	GO:0043566	structure-specific DNA binding
4	GO:0005048	signal sequence binding	1	0.6	GO:0042277	peptide binding
4	GO:0005096	GTPase activator activity	1	0.6	GO:0030695, GO:0008047	GTPase regulator activity, enzyme activator activity
6	GO:0004869	cysteine-type endopeptidase inhibitor activity	1	0.6	GO:0004866	endopeptidase inhibitor activity
7	GO:0019829	cation-transporting ATPase activity	1	0.6	GO:0008324, GO:0042625	cation transmembrane transporter activity, ATPase activity, coupled to transmembrane movement of ions
5	GO:0070325	lipoprotein particle receptor binding	1	0.6	GO:0005102	receptor binding
7	GO:0003886	DNA (cytosine-5-)-methyltransferase activity	1	0.6	GO:0009008, GO:0008757	DNA-methyltransferase activity, S-adenosylmethionine-dependent methyltransferase activity
7	GO:0035326	enhancer binding	1	0.6	GO:0044212	transcription regulatory region DNA binding
8	GO:0016891	endoribonuclease activity, producing 5'-phosphomonoesters	1	0.6	GO:0004521, GO:0016893	endoribonuclease activity, endonuclease activity, active with either ribo- or deoxyribonucleic acids and producing 5'-phosphomonoesters
4	GO:0032452	histone demethylase activity	1	0.6	GO:0032451	demethylase activity
3	GO:0043498	cell surface binding	1	0.6	GO:0005488	binding
4	GO:0051536	iron-sulfur cluster binding	1	0.6	GO:0051540	metal cluster binding
8	GO:0035184	histone threonine kinase activity	1	0.6	GO:0035173, GO:0004674	histone kinase activity, protein serine/threonine kinase activity
4	GO:0071813	lipoprotein particle binding	1	0.6	GO:0071814	protein-lipid complex binding
7	GO:0017136	NAD-dependent histone deacetylase activity	1	0.6	GO:0004407, GO:0034979	histone deacetylase activity, NAD-dependent protein deacetylase activity
6	GO:0004812	aminoacyl-tRNA ligase activity	1	0.6	GO:0016876	ligase activity, forming aminoacyl-tRNA and related compounds
7	GO:0005506	iron ion binding	1	0.6	GO:0046914	transition metal ion binding
4	GO:0016701	oxidoreductase activity, acting on single donors with incorporation of molecular oxygen	1	0.6	GO:0016491	oxidoreductase activity
7	GO:0001614	purinergic nucleotide receptor activity	1	0.6	GO:0016502, GO:0035586	nucleotide receptor activity, purinergic receptor activity
4	GO:0016765	transferase activity, transferring alkyl or aryl (other than methyl) groups	1	0.6	GO:0016740	transferase activity
5	GO:0015248	sterol transporter activity	1	0.6	GO:0005319	lipid transporter activity
8	GO:0005272	sodium channel activity	1	0.6	GO:0015081, GO:0005261	sodium ion transmembrane transporter activity, cation channel activity
5	GO:0004859	phospholipase inhibitor activity	1	0.6	GO:0055102	lipase inhibitor activity
4	GO:0019888	protein phosphatase regulator activity	1	0.6	GO:0019208	phosphatase regulator activity
7	GO:0001608	G-protein coupled nucleotide receptor activity	1	0.6	GO:0004930	G-protein coupled receptor activity
8	GO:0046030	inositol trisphosphate phosphatase activity	1	0.6	GO:0052745	inositol phosphate phosphatase activity
7	GO:0016413	O-acetyltransferase activity	1	0.6	GO:0008374, GO:0016407	O-acyltransferase activity, acetyltransferase activity
6	GO:0004312	fatty acid synthase activity	1	0.6	GO:0016747	transferase activity, transferring acyl groups other than amino-acyl groups
7	GO:0032129	histone deacetylase activity (H3-K9 specific)	1	0.6	GO:0004407	histone deacetylase activity
8	GO:0015269	calcium-activated potassium channel activity	1	0.6	GO:0005267, GO:0005227, GO:0022839	potassium channel activity, calcium activated cation channel activity, ion gated channel activity
10	GO:0008094	DNA-dependent ATPase activity	1	0.6	GO:0042623	ATPase activity, coupled
10	GO:0008186	RNA-dependent ATPase activity	1	0.6	GO:0042623	ATPase activity, coupled
5	GO:0052689	carboxylic ester hydrolase activity	1	0.6	GO:0016788	hydrolase activity, acting on ester bonds
5	GO:0016706	oxidoreductase activity, acting on paired donors, with incorporation or reduction of molecular oxygen, 2-oxoglutarate as one donor, and incorporation of one atom each of oxygen into both donors	1	0.6	GO:0016705, GO:0051213	oxidoreductase activity, acting on paired donors, with incorporation or reduction of molecular oxygen, dioxygenase activity
5	GO:0005072	transforming growth factor beta receptor, cytoplasmic mediator activity	1	0.6	GO:0005057	receptor signaling protein activity
8	GO:0052744	phosphatidylinositol monophosphate phosphatase activity	1	0.6	GO:0052866	phosphatidylinositol phosphate phosphatase activity
10	GO:0008026	ATP-dependent helicase activity	1	0.6	GO:0042623, GO:0070035	ATPase activity, coupled, purine NTP-dependent helicase activity
6	GO:0071855	neuropeptide receptor binding	1	0.6	GO:0001664	G-protein coupled receptor binding
7	GO:0070697	activin receptor binding	1	0.6	GO:0070696	transmembrane receptor protein serine/threonine kinase binding
5	GO:0036041	long-chain fatty acid binding	1	0.6	GO:0005504	fatty acid binding
6	GO:0043175	RNA polymerase core enzyme binding	1	0.6	GO:0070063	RNA polymerase binding
3	GO:0030226	apolipoprotein receptor activity	1	0.6	GO:0004872	receptor activity
3	GO:0043028	cysteine-type endopeptidase regulator activity involved in apoptotic process	1	0.6	GO:0030234	enzyme regulator activity
5	GO:0016868	intramolecular transferase activity, phosphotransferases	1	0.6	GO:0016866	intramolecular transferase activity
6	GO:0070717	poly-purine tract binding	1	0.6	GO:0003727	single-stranded RNA binding
5	GO:0016857	racemase and epimerase activity, acting on carbohydrates and derivatives	1	0.6	GO:0016854	racemase and epimerase activity
5	GO:0032934	sterol binding	1	0.6	GO:0005496	steroid binding
3	GO:0001871	pattern binding	2	0.58	GO:0005488	binding
4	GO:0016757	transferase activity, transferring glycosyl groups	2	0.58	GO:0016740	transferase activity
8	GO:0072509	divalent inorganic cation transmembrane transporter activity	2	0.58	GO:0022890	inorganic cation transmembrane transporter activity
4	GO:0016746	transferase activity, transferring acyl groups	3	0.56	GO:0016740	transferase activity
7	GO:0022832	voltage-gated channel activity	3	0.56	GO:0022836	gated channel activity
5	GO:0005342	organic acid transmembrane transporter activity	1	0.49	GO:0022891	substrate-specific transmembrane transporter activity
5	GO:0042626	ATPase activity, coupled to transmembrane movement of substances	3	0.48	GO:0016820, GO:0043492, GO:0015405	hydrolase activity, acting on acid anhydrides, catalyzing transmembrane movement of substances, ATPase activity, coupled to movement of substances, P-P-bond-hydrolysis-driven transmembrane transporter activity
4	GO:0016782	transferase activity, transferring sulfur-containing groups	1	0.43	GO:0016740	transferase activity
3	GO:0016829	lyase activity	1	0.43	GO:0003824	catalytic activity
6	GO:0008081	phosphoric diester hydrolase activity	2	0.43	GO:0042578	phosphoric ester hydrolase activity
6	GO:0008757	S-adenosylmethionine-dependent methyltransferase activity	1	0.36	GO:0008168	methyltransferase activity
5	GO:0019902	phosphatase binding	1	0.36	GO:0019899	enzyme binding
4	GO:0016866	intramolecular transferase activity	1	0.36	GO:0016853	isomerase activity
7	GO:0035173	histone kinase activity	1	0.36	GO:0004672	protein kinase activity
6	GO:0005088	Ras guanyl-nucleotide exchange factor activity	1	0.36	GO:0005083, GO:0005085	small GTPase regulator activity, guanyl-nucleotide exchange factor activity
6	GO:0015171	amino acid transmembrane transporter activity	1	0.36	GO:0005275, GO:0046943	amine transmembrane transporter activity, carboxylic acid transmembrane transporter activity
6	GO:0009008	DNA-methyltransferase activity	1	0.36	GO:0008168	methyltransferase activity
6	GO:0008374	O-acyltransferase activity	1	0.36	GO:0016747	transferase activity, transferring acyl groups other than amino-acyl groups
6	GO:0034979	NAD-dependent protein deacetylase activity	1	0.36	GO:0033558	protein deacetylase activity
4	GO:0017171	serine hydrolase activity	1	0.36	GO:0016787	hydrolase activity
7	GO:0004521	endoribonuclease activity	1	0.36	GO:0004540, GO:0004519	ribonuclease activity, endonuclease activity
7	GO:0016893	endonuclease activity, active with either ribo- or deoxyribonucleic acids and producing 5'-phosphomonoesters	1	0.36	GO:0004519	endonuclease activity
7	GO:0052745	inositol phosphate phosphatase activity	1	0.36	GO:0016791	phosphatase activity
6	GO:0019205	nucleobase-containing compound kinase activity	1	0.36	GO:0016301	kinase activity
5	GO:0050542	icosanoid binding	1	0.36	GO:0005504	fatty acid binding
4	GO:0016705	oxidoreductase activity, acting on paired donors, with incorporation or reduction of molecular oxygen	1	0.36	GO:0016491	oxidoreductase activity
8	GO:0005227	calcium activated cation channel activity	1	0.36	GO:0005261	cation channel activity
6	GO:0016407	acetyltransferase activity	1	0.36	GO:0016747	transferase activity, transferring acyl groups other than amino-acyl groups
5	GO:0016876	ligase activity, forming aminoacyl-tRNA and related compounds	1	0.36	GO:0016875	ligase activity, forming carbon-oxygen bonds
5	GO:0070063	RNA polymerase binding	1	0.36	GO:0019899	enzyme binding
9	GO:0070035	purine NTP-dependent helicase activity	1	0.36	GO:0004386	helicase activity
7	GO:0001047	core promoter binding	1	0.36	GO:0044212	transcription regulatory region DNA binding
4	GO:0055102	lipase inhibitor activity	1	0.36	GO:0004857	enzyme inhibitor activity
5	GO:0016502	nucleotide receptor activity	1	0.36	GO:0004888	transmembrane signaling receptor activity
3	GO:0032451	demethylase activity	1	0.36	GO:0003824	catalytic activity
5	GO:0015932	nucleobase-containing compound transmembrane transporter activity	1	0.36	GO:0022891	substrate-specific transmembrane transporter activity
6	GO:0070696	transmembrane receptor protein serine/threonine kinase binding	1	0.36	GO:0033612	receptor serine/threonine kinase binding
5	GO:0008194	UDP-glycosyltransferase activity	1	0.36	GO:0016757	transferase activity, transferring glycosyl groups
6	GO:0008378	galactosyltransferase activity	1	0.36	GO:0016758	transferase activity, transferring hexosyl groups
4	GO:0016854	racemase and epimerase activity	1	0.36	GO:0016853	isomerase activity
3	GO:0071814	protein-lipid complex binding	1	0.36	GO:0005488	binding
3	GO:0051540	metal cluster binding	1	0.36	GO:0005488	binding
6	GO:0004407	histone deacetylase activity	1	0.36	GO:0033558, GO:0016811	protein deacetylase activity, hydrolase activity, acting on carbon-nitrogen (but not peptide) bonds, in linear amides
7	GO:0052866	phosphatidylinositol phosphate phosphatase activity	1	0.36	GO:0016791	phosphatase activity
4	GO:0001098	basal transcription machinery binding	1	0.36	GO:0005515	protein binding
3	GO:0019208	phosphatase regulator activity	1	0.36	GO:0030234	enzyme regulator activity
5	GO:0035586	purinergic receptor activity	1	0.36	GO:0004888	transmembrane signaling receptor activity
5	GO:0004866	endopeptidase inhibitor activity	1	0.36	GO:0030414, GO:0061135	peptidase inhibitor activity, endopeptidase regulator activity
4	GO:0016820	hydrolase activity, acting on acid anhydrides, catalyzing transmembrane movement of substances	3	0.29	GO:0016817, GO:0022857	hydrolase activity, acting on acid anhydrides, transmembrane transporter activity
10	GO:0043492	ATPase activity, coupled to movement of substances	3	0.29	GO:0042623	ATPase activity, coupled
6	GO:0015405	P-P-bond-hydrolysis-driven transmembrane transporter activity	3	0.29	GO:0015399	primary active transmembrane transporter activity
5	GO:0033612	receptor serine/threonine kinase binding	1	0.22	GO:0005102	receptor binding
4	GO:0005504	fatty acid binding	1	0.22	GO:0033293, GO:0008289	monocarboxylic acid binding, lipid binding
5	GO:0016758	transferase activity, transferring hexosyl groups	1	0.22	GO:0016757	transferase activity, transferring glycosyl groups
5	GO:0005275	amine transmembrane transporter activity	1	0.22	GO:0022804, GO:0022891	active transmembrane transporter activity, substrate-specific transmembrane transporter activity
5	GO:0033558	protein deacetylase activity	1	0.22	GO:0019213	deacetylase activity
6	GO:0004540	ribonuclease activity	1	0.22	GO:0004518	nuclease activity
5	GO:0016811	hydrolase activity, acting on carbon-nitrogen (but not peptide) bonds, in linear amides	1	0.22	GO:0016810	hydrolase activity, acting on carbon-nitrogen (but not peptide) bonds
4	GO:0016875	ligase activity, forming carbon-oxygen bonds	1	0.22	GO:0016874	ligase activity
4	GO:0061135	endopeptidase regulator activity	1	0.22	GO:0061134	peptidase regulator activity
6	GO:0004519	endonuclease activity	1	0.22	GO:0004518	nuclease activity
4	GO:0030414	peptidase inhibitor activity	1	0.22	GO:0004857, GO:0061134	enzyme inhibitor activity, peptidase regulator activity
5	GO:0015399	primary active transmembrane transporter activity	3	0.17	GO:0022804	active transmembrane transporter activity
5	GO:0004518	nuclease activity	1	0.13	GO:0016788	hydrolase activity, acting on ester bonds
3	GO:0061134	peptidase regulator activity	1	0.13	GO:0030234	enzyme regulator activity
4	GO:0019213	deacetylase activity	1	0.13	GO:0016787	hydrolase activity
4	GO:0016810	hydrolase activity, acting on carbon-nitrogen (but not peptide) bonds	1	0.13	GO:0016787	hydrolase activity
4	GO:0033293	monocarboxylic acid binding	1	0.13	GO:0031406	carboxylic acid binding
3	GO:0031406	carboxylic acid binding	1	0.08	GO:0005488	binding
